# Supplementary material
Source: Research Square preprint supplement (doi:10.21203/rs.3.rs-9716648/v1)
Supplement: Supplementary file 1 [file 3b5428ac6e427b2d5dfb28b8.xlsx]

## Sheet: Readme
Supporting Information for
A hierarchical building material intensity framework for circular economy potential modelling
In this Supplementary Information SI3, data on results to generate Figure 4 & 5 are provided.
Sheet	Description
Figure 4	Building level material stock results based on Monte Carlo Sample for a pre 1920 house
Figure 5	Material stock results for the study area as per different building levels of the HMI framework

## Sheet: Figure 4
Title: Building level material stock results based on Monte Carlo sample for a pre 1920 house used for Figure 4 in the main paper.
Note:
1. The results are shared for all the monte carlo simulation iterations (count=500), where as explained in the main paper for each iteration one design specification is selected for each Layer-Function-Sub function combination.
2. The Gross floor area of the pre 1920 house is 231 square meters.
	Iteration	Layer	Function	Subfunction	Technology	Specification	Material	mass(ton)
	0	Skin	Wall	Internal finish	Plaster	13 mm thick dense plaster	plaster	6.09008
	0	Skin	Floor	Finish 1	Floor finish	10 mm thick carpet/underlay	carpet/underlay	0.231
	0	Skin	Floor	Intermediate finish 1	Screed	50 mm thick screed	screed	6.93
	0	Skin	Opening	Door	Wooden door	Rationel AURA / Rationel FORMA	timber	0.212035
	0	Skin	Opening	Door	Wooden door	Rationel AURA / Rationel FORMA	glass	0.318826
	0	Skin	Opening	Window	Composite frame window	Side-hung window 2+1 Kipp/Dreh - IKL-AL	timber	0.126908
	0	Skin	Opening	Window	Composite frame window	Side-hung window 2+1 Kipp/Dreh - IKL-AL	glass	0.736197
	0	Space	Wall	Finish 1	Plaster	13 mm thick lightweight plaster	plaster	1.4054
	0	Space	Wall	Intermediate finish 1	Timber	6.5 mm thick 35 mm wide timber laths	timber	0.22545
	0	Space	Wall	Non-Load Bearing Structure	Brick	220 mm thick brick	brick	69.3693
	0	Space	Wall	Intermediate support	Timber	25 mm thick timber battens at 600mm c/c spacing	timber studwork	0.317567
	0	Space	Wall	Intermediate finish 2	Timber	6.5 mm thick 35 mm wide timber laths	timber	0.22545
	0	Space	Wall	Finish 2	Plaster	13 mm thick lightweight plaster	plaster	1.4054
	0	Space	Floor	Finish 1	Floor finish	10 mm thick carpet/underlay	carpet/underlay	0.231
	0	Space	Floor	Intermediate finish 1	Timber	19 mm thick timber or chipboard	chipboard	1.3167
	0	Space	Floor	Finish 2	Plaster	13 mm thick lightweight plaster	plaster	0.9009
	0	Space	Opening	Door	Wooden Door	Forza FD60 Flush Solid Core Timber Door	timber	1.13994
	0	Services	Heating	Heat Source	Gas Boiler	20kW AVANTA ACE (Netherlands)	steel	0.0083
	0	Services	Heating	Heat Source	Gas Boiler	20kW AVANTA ACE (Netherlands)	stainless steel	0.0066
	0	Services	Heating	Heat Source	Gas Boiler	20kW AVANTA ACE (Netherlands)	aluminium	0.00184
	0	Services	Heating	Heat Source	Gas Boiler	20kW AVANTA ACE (Netherlands)	copper	0.00101
	0	Services	Heating	Heat Source	Gas Boiler	20kW AVANTA ACE (Netherlands)	plastic	0.00653
	0	Services	Heating	Emitter	Hot Water Radiator	1kW Therma Hot Water Radiator Range	steel	0.567308
	0	Services	Heating	Storage	Storage tank	300L ACV SMART E	steel	0.01442
	0	Services	Heating	Storage	Storage tank	300L ACV SMART E	stainless steel	0.00752
	0	Services	Heating	Storage	Storage tank	300L ACV SMART E	plastic	0.007012
	0	Services	Heating	Transportation	Heating pipe	15mm Copper Pipe 0.7mm thickness	copper	0.0213444
	0	Services	Electrical	Wiring	Electrical cable	2.5mm2 twin and earth cable	copper	0.00823284
	0	Services	Electrical	Wiring	Electrical cable	2.5mm2 twin and earth cable	plastic	0.00590436
	0	Services	Plumbing	Transportation	Plumbing pipe	40mm Plastic Waste Pipe 1.9 mm thickness	plastic	0.0251143
	0	Structure	Wall	Load bearing	Stone	600mm thick slate	slate	605.405
	0	Structure	Floor	Load bearing	Timber	200 mm thick timber joists at 600mm c/c spacing	timber	3.2571
	0	Structure	Roof	Load bearing	Insitu Concrete	80 mm thick concrete	concrete	18.48
	0	Skin	Roof	Finish 1	Timber	19 mm thick timber or chipboard	chipboard	1.3167
	1	Skin	Wall	Internal finish	Plaster	13 mm thick dense plaster	plaster	6.09008
	1	Skin	Floor	Finish 1	Floor finish	10 mm thick carpet/underlay	carpet/underlay	0.231
	1	Skin	Opening	Door	Steel door	Steel doors S30/Y30 - S63/Y63	timber	0.00545738
	1	Skin	Opening	Window	Composite frame window	Viking SW17 Aluclad Window Viking SW17 Wooden Window	timber	0.27054
	1	Skin	Opening	Window	Composite frame window	Viking SW17 Aluclad Window Viking SW17 Wooden Window	glass	0.757185
	1	Space	Wall	Finish 1	Plaster	13 mm thick lightweight plaster	plaster	1.4054
	1	Space	Wall	Intermediate finish 1	Timber	6.5 mm thick 35 mm wide timber laths	timber	0.22545
	1	Space	Wall	Non-Load Bearing Structure	Brick	220 mm thick brick	brick	69.3693
	1	Space	Wall	Intermediate support	Timber	95 mm thick studding at 600mm c/c spacing	timber studwork	1.20676
	1	Space	Wall	Intermediate finish 2	Timber	6.5 mm thick 35 mm wide timber laths	timber	0.22545
	1	Space	Wall	Finish 2	Plaster	13 mm thick lightweight plaster	plaster	1.4054
	1	Space	Floor	Finish 1	Floor finish	10 mm thick carpet/underlay	carpet/underlay	0.231
	1	Space	Floor	Intermediate finish 1	Timber	19 mm thick timber or chipboard	chipboard	1.3167
	1	Space	Floor	Finish 2	Plaster	13 mm thick lightweight plaster	plaster	0.9009
	1	Space	Opening	Door	Wooden Door	Forza FD60 Flush Solid Core Timber Door	timber	1.13994
	1	Services	Heating	Heat Source	Gas Boiler	24kW TZERRA Ace-Matic System (BE)	steel	0.01267
	1	Services	Heating	Heat Source	Gas Boiler	24kW TZERRA Ace-Matic System (BE)	stainless steel	0.00553
	1	Services	Heating	Heat Source	Gas Boiler	24kW TZERRA Ace-Matic System (BE)	aluminium	0.00191
	1	Services	Heating	Heat Source	Gas Boiler	24kW TZERRA Ace-Matic System (BE)	brass	0.00162
	1	Services	Heating	Heat Source	Gas Boiler	24kW TZERRA Ace-Matic System (BE)	plastic	0.00693
	1	Services	Heating	Emitter	Hot Water Radiator	1kW Galant Hot Water Radiator Range	steel	0.678234
	1	Services	Heating	Storage	Storage tank	300L Atlantic Mileo + 300	stainless steel	0.01382
	1	Services	Heating	Storage	Storage tank	300L Atlantic Mileo + 300	plastic	0.01244
	1	Services	Heating	Transportation	Heating pipe	22mm Plastic Pipe 2mm thickness	plastic	0.00670824
	1	Services	Electrical	Wiring	Electrical cable	1.5mm2 twin and earth cable	copper	0.00557172
	1	Services	Electrical	Wiring	Electrical cable	1.5mm2 twin and earth cable	plastic	0.00399168
	1	Services	Plumbing	Transportation	Plumbing pipe	50mm Plastic Waste Pipe 2.4 mm thickness	plastic	0.0396673
	1	Skin	Floor	Intermediate finish 1	Timber	19 mm thick timber or chipboard	chipboard	1.3167
	1	Structure	Wall	Load bearing	Brick	105 mm thick brick	brick	66.2161
	1	Structure	Floor	Load bearing	Timber	200 mm thick timber joists at 600mm c/c spacing	timber	3.2571
	1	Structure	Roof	Load bearing	Insitu Concrete	65 mm thick cast concrete	concrete	15.015
	1	Skin	Roof	Finish 1	Timber	19 mm thick timber or chipboard	chipboard	1.3167
	2	Skin	Wall	Internal finish	Plaster	13 mm thick dense plaster	plaster	6.09008
	2	Skin	Floor	Finish 1	Floor finish	10 mm thick carpet/underlay	carpet/underlay	0.231
	2	Skin	Opening	Door	Steel door	Steel doors S30/Y30 - S63/Y63	timber	0.00545738
	2	Skin	Opening	Window	Metal frame window	forster unico Windows	glass	1.62547
	2	Space	Wall	Finish 1	Plaster	13 mm thick lightweight plaster	plaster	1.4054
	2	Space	Wall	Intermediate finish 1	Timber	6.5 mm thick 35 mm wide timber laths	timber	0.22545
	2	Space	Wall	Non-Load Bearing Structure	Brick	220 mm thick brick	brick	69.3693
	2	Space	Wall	Intermediate support	Timber	25 mm thick timber battens at 600mm c/c spacing	timber studwork	0.317567
	2	Space	Wall	Intermediate finish 2	Timber	6.5 mm thick 35 mm wide timber laths	timber	0.22545
	2	Space	Wall	Finish 2	Plaster	13 mm thick dense plaster	plaster	3.04504
	2	Space	Floor	Finish 1	Floor finish	10 mm thick carpet/underlay	carpet/underlay	0.231
	2	Space	Floor	Intermediate finish 1	Screed	50 mm thick screed	screed	6.93
	2	Space	Floor	Finish 2	Plaster	13 mm thick dense plaster	plaster	1.95195
	2	Space	Opening	Door	Wooden Door	Forza FD60 Flush Solid Core Timber Door	timber	1.13994
	2	Services	Heating	Heat Source	Gas Boiler	25kW ecoTEC plus VUW 25/32CS/1-5 (N-FR)	steel	0.01556
	2	Services	Heating	Heat Source	Gas Boiler	25kW ecoTEC plus VUW 25/32CS/1-5 (N-FR)	stainless steel	0.0094
	2	Services	Heating	Heat Source	Gas Boiler	25kW ecoTEC plus VUW 25/32CS/1-5 (N-FR)	aluminium	0.00245
	2	Services	Heating	Heat Source	Gas Boiler	25kW ecoTEC plus VUW 25/32CS/1-5 (N-FR)	copper	0.00275
	2	Services	Heating	Heat Source	Gas Boiler	25kW ecoTEC plus VUW 25/32CS/1-5 (N-FR)	brass	0.00269
	2	Services	Heating	Heat Source	Gas Boiler	25kW ecoTEC plus VUW 25/32CS/1-5 (N-FR)	plastic	0.00355
	2	Services	Heating	Emitter	Hot Water Radiator	1kW Galant Hot Water Radiator Range	steel	0.678234
	2	Services	Heating	Storage	Storage tank	300L Atlantic Mileo + 300	stainless steel	0.01382
	2	Services	Heating	Storage	Storage tank	300L Atlantic Mileo + 300	plastic	0.01244
	2	Services	Heating	Transportation	Heating pipe	22mm Copper Pipe 0.9mm thickness	copper	0.0404019
	2	Services	Electrical	Wiring	Electrical cable	2.5mm2 twin and earth cable	copper	0.00823284
	2	Services	Electrical	Wiring	Electrical cable	2.5mm2 twin and earth cable	plastic	0.00590436
	2	Services	Plumbing	Transportation	Plumbing pipe	110mm Plastic Soil Pipe 4.2 mm thickness	plastic	0.154428
	2	Skin	Floor	Intermediate finish 1	Timber	19 mm thick timber or chipboard	chipboard	1.3167
	2	Structure	Wall	Load bearing	Brick	215 mm thick brick	brick	135.585
	2	Structure	Floor	Load bearing	Timber	100 mm thick timber joists at 600mm c/c spacing	timber	1.62855
	2	Structure	Roof	Load bearing	Insitu Concrete	65 mm thick cast concrete	concrete	15.015
	2	Skin	Roof	Finish 1	Timber	19 mm thick timber or chipboard	chipboard	1.3167
	3	Skin	Wall	Internal finish	Plaster	13 mm thick lightweight plaster	plaster	2.81081
	3	Skin	Floor	Finish 1	Floor finish	10 mm thick carpet/underlay	carpet/underlay	0.231
	3	Skin	Floor	Intermediate finish 1	Screed	75 mm thick screed	screed	10.395
	3	Skin	Opening	Door	Wooden door	OPUS Wooden Front Doors with glass	timber	0.363825
	3	Skin	Opening	Door	Wooden door	OPUS Wooden Front Doors with glass	glass	0.0606375
	3	Skin	Opening	Window	Composite frame window	SERIE STH ECO Â– WINDOW SYSTEM	timber	0.178721
	3	Skin	Opening	Window	Composite frame window	SERIE STH ECO Â– WINDOW SYSTEM	glass	0.762104
	3	Space	Wall	Finish 1	Plaster	13 mm thick lightweight plaster	plaster	1.4054
	3	Space	Wall	Intermediate finish 1	Timber	6.5 mm thick 35 mm wide timber laths	timber	0.22545
	3	Space	Wall	Non-Load Bearing Structure	Brick	105 mm thick brick	brick	33.1081
	3	Space	Wall	Intermediate support	Timber	95 mm thick studding at 600mm c/c spacing	timber studwork	1.20676
	3	Space	Wall	Intermediate finish 2	Timber	6.5 mm thick 35 mm wide timber laths	timber	0.22545
	3	Space	Wall	Finish 2	Plaster	13 mm thick lightweight plaster	plaster	1.4054
	3	Space	Floor	Finish 1	Floor finish	10 mm thick carpet/underlay	carpet/underlay	0.231
	3	Space	Floor	Intermediate finish 1	Screed	50 mm thick screed	screed	6.93
	3	Space	Floor	Finish 2	Plaster	13 mm thick lightweight plaster	plaster	0.9009
	3	Space	Opening	Door	Wooden Door	Forza FD60 Flush Solid Core Timber Door	timber	1.13994
	3	Services	Heating	Heat Source	Gas Boiler	25kW ThermaFast Condens 31	steel	0.0167
	3	Services	Heating	Heat Source	Gas Boiler	25kW ThermaFast Condens 31	aluminium	0.00249
	3	Services	Heating	Heat Source	Gas Boiler	25kW ThermaFast Condens 31	copper	0.00365
	3	Services	Heating	Heat Source	Gas Boiler	25kW ThermaFast Condens 31	brass	0.00288
	3	Services	Heating	Heat Source	Gas Boiler	25kW ThermaFast Condens 31	plastic	0.00237
	3	Services	Heating	Emitter	Hot Water Radiator	1kW Galant Hot Water Radiator Range	steel	0.678234
	3	Services	Heating	Storage	Storage tank	606L HRI 600	steel	0.04476
	3	Services	Heating	Storage	Storage tank	606L HRI 600	stainless steel	0.03076
	3	Services	Heating	Storage	Storage tank	606L HRI 600	plastic	0.002796
	3	Services	Heating	Transportation	Heating pipe	22mm Copper Pipe 0.9mm thickness	copper	0.0404019
	3	Services	Electrical	Wiring	Electrical cable	1.5mm2 twin and earth cable	copper	0.00557172
	3	Services	Electrical	Wiring	Electrical cable	1.5mm2 twin and earth cable	plastic	0.00399168
	3	Services	Plumbing	Transportation	Plumbing pipe	40mm Plastic Waste Pipe 1.9 mm thickness	plastic	0.0251143
	3	Structure	Wall	Load bearing	Stone	600 mm thick sandstone	sandstone	497.297
	3	Structure	Floor	Load bearing	Timber	200 mm thick timber joists at 600mm c/c spacing	timber	3.2571
	3	Structure	Roof	Load bearing	Insitu Concrete	150 mm thick cast concrete	concrete	34.65
	3	Skin	Roof	Finish 1	Timber	19 mm thick timber or chipboard	chipboard	1.3167
	4	Skin	Wall	Internal finish	Plaster	13 mm thick lightweight plaster	plaster	2.81081
	4	Skin	Floor	Finish 1	Floor finish	10 mm thick carpet/underlay	carpet/underlay	0.231
	4	Skin	Floor	Intermediate finish 1	Screed	75 mm thick screed	screed	10.395
	4	Skin	Opening	Door	Steel door	Steel doors S30/Y30 - S63/Y63	timber	0.00545738
	4	Skin	Opening	Window	Wooden frame window	Side hung window 3-glass Alu - AFSC	timber	0.305956
	4	Skin	Opening	Window	Wooden frame window	Side hung window 3-glass Alu - AFSC	glass	0.73423
	4	Space	Wall	Finish 1	Plaster	13 mm thick dense plaster	plaster	3.04504
	4	Space	Wall	Intermediate finish 1	Timber	6.5 mm thick 35 mm wide timber laths	timber	0.22545
	4	Space	Wall	Non-Load Bearing Structure	Brick	220 mm thick brick	brick	69.3693
	4	Space	Wall	Intermediate support	Timber	140 mm thick studding at 600mm c/c spacing	timber studwork	1.77838
	4	Space	Wall	Intermediate finish 2	Timber	6.5 mm thick 35 mm wide timber laths	timber	0.22545
	4	Space	Wall	Finish 2	Plaster	13 mm thick dense plaster	plaster	3.04504
	4	Space	Floor	Finish 1	Floor finish	10 mm thick carpet/underlay	carpet/underlay	0.231
	4	Space	Floor	Intermediate finish 1	Screed	75 mm thick screed	screed	10.395
	4	Space	Floor	Finish 2	Plaster	13 mm thick dense plaster	plaster	1.95195
	4	Space	Opening	Door	Wooden Door	Forza FD60 Flush Solid Core Timber Door	timber	1.13994
	4	Services	Heating	Heat Source	Gas Boiler	24kW Mixed Wall mounted gas condensing boiler - MCR-S	steel	0.01081
	4	Services	Heating	Heat Source	Gas Boiler	24kW Mixed Wall mounted gas condensing boiler - MCR-S	stainless steel	0.0076
	4	Services	Heating	Heat Source	Gas Boiler	24kW Mixed Wall mounted gas condensing boiler - MCR-S	aluminium	0.00168
	4	Services	Heating	Heat Source	Gas Boiler	24kW Mixed Wall mounted gas condensing boiler - MCR-S	plastic	0.00667
	4	Services	Heating	Emitter	Hot Water Radiator	1kW Galant Hot Water Radiator Range	steel	0.678234
	4	Services	Heating	Storage	Storage tank	300L Atlantic Mileo + 300	stainless steel	0.01382
	4	Services	Heating	Storage	Storage tank	300L Atlantic Mileo + 300	plastic	0.01244
	4	Services	Heating	Transportation	Heating pipe	22mm Copper Pipe 0.9mm thickness	copper	0.0404019
	4	Services	Electrical	Wiring	Electrical cable	2.5mm2 twin and earth cable	copper	0.00823284
	4	Services	Electrical	Wiring	Electrical cable	2.5mm2 twin and earth cable	plastic	0.00590436
	4	Services	Plumbing	Transportation	Plumbing pipe	40mm Plastic Waste Pipe 1.9 mm thickness	plastic	0.0251143
	4	Structure	Wall	Load bearing	Brick	220 mm thick brick	brick	138.739
	4	Structure	Floor	Load bearing	Timber	100 mm thick timber joists at 600mm c/c spacing	timber	1.62855
	4	Structure	Roof	Load bearing	Timber	100 mm thick timber rafters at 600mm c/c spacing	timber	0.814275
	4	Skin	Roof	Finish 1	Timber	19 mm thick timber or chipboard	chipboard	1.3167
	5	Skin	Wall	Internal finish	Plaster	13 mm thick lightweight plaster	plaster	2.81081
	5	Skin	Floor	Finish 1	Floor finish	10 mm thick carpet/underlay	carpet/underlay	0.231
	5	Skin	Floor	Intermediate finish 1	Screed	75 mm thick screed	screed	10.395
	5	Skin	Opening	Door	Wooden door	Rationel AURA / Rationel FORMA	timber	0.212035
	5	Skin	Opening	Door	Wooden door	Rationel AURA / Rationel FORMA	glass	0.318826
	5	Skin	Opening	Window	Composite frame window	Viking SW17 Aluclad Window Viking SW17 Wooden Window	timber	0.27054
	5	Skin	Opening	Window	Composite frame window	Viking SW17 Aluclad Window Viking SW17 Wooden Window	glass	0.757185
	5	Space	Wall	Finish 1	Plaster	13 mm thick lightweight plaster	plaster	1.4054
	5	Space	Wall	Intermediate finish 1	Timber	6.5 mm thick 35 mm wide timber laths	timber	0.22545
	5	Space	Wall	Non-Load Bearing Structure	Brick	105 mm thick brick	brick	33.1081
	5	Space	Wall	Intermediate support	Timber	140 mm thick studding at 600mm c/c spacing	timber studwork	1.77838
	5	Space	Wall	Intermediate finish 2	Timber	6.5 mm thick 35 mm wide timber laths	timber	0.22545
	5	Space	Wall	Finish 2	Plaster	13 mm thick dense plaster	plaster	3.04504
	5	Space	Floor	Finish 1	Floor finish	10 mm thick carpet/underlay	carpet/underlay	0.231
	5	Space	Floor	Intermediate finish 1	Screed	50 mm thick screed	screed	6.93
	5	Space	Floor	Finish 2	Plaster	13 mm thick dense plaster	plaster	1.95195
	5	Space	Opening	Door	Wooden Door	Forza FD60 Flush Solid Core Timber Door	timber	1.13994
	5	Services	Heating	Heat Source	Gas Boiler	20kW AVANTA ACE (export)	steel	0.01187
	5	Services	Heating	Heat Source	Gas Boiler	20kW AVANTA ACE (export)	stainless steel	0.00661
	5	Services	Heating	Heat Source	Gas Boiler	20kW AVANTA ACE (export)	aluminium	0.00184
	5	Services	Heating	Heat Source	Gas Boiler	20kW AVANTA ACE (export)	copper	0.00101
	5	Services	Heating	Heat Source	Gas Boiler	20kW AVANTA ACE (export)	plastic	0.00695
	5	Services	Heating	Emitter	Hot Water Radiator	1kW Fassane Pack double Ã ailettes	steel	0.707211
	5	Services	Heating	Emitter	Hot Water Radiator	1kW Fassane Pack double Ã ailettes	brass	0.0022638
	5	Services	Heating	Emitter	Hot Water Radiator	1kW Fassane Pack double Ã ailettes	plastic	0.00543312
	5	Services	Heating	Storage	Storage tank	606L HRI 600	steel	0.04476
	5	Services	Heating	Storage	Storage tank	606L HRI 600	stainless steel	0.03076
	5	Services	Heating	Storage	Storage tank	606L HRI 600	plastic	0.002796
	5	Services	Heating	Transportation	Heating pipe	15mm Copper Pipe 0.7mm thickness	copper	0.0213444
	5	Services	Electrical	Wiring	Electrical cable	1.5mm2 twin and earth cable	copper	0.00557172
	5	Services	Electrical	Wiring	Electrical cable	1.5mm2 twin and earth cable	plastic	0.00399168
	5	Services	Plumbing	Transportation	Plumbing pipe	50mm Plastic Waste Pipe 2.4 mm thickness	plastic	0.0396673
	5	Structure	Wall	Load bearing	Stone	600mm thick slate	slate	605.405
	5	Structure	Floor	Load bearing	Timber	100 mm thick timber joists at 600mm c/c spacing	timber	1.62855
	5	Structure	Roof	Load bearing	Timber	150 mm thick timber rafters at 600mm c/c spacing	timber	1.22141
	5	Skin	Roof	Finish 1	Timber	19 mm thick timber or chipboard	chipboard	1.3167
	6	Skin	Wall	Internal finish	Plaster	13 mm thick lightweight plaster	plaster	2.81081
	6	Skin	Floor	Finish 1	Floor finish	10 mm thick carpet/underlay	carpet/underlay	0.231
	6	Skin	Opening	Door	Steel door	Steel doors S30/Y30 - S63/Y63	timber	0.00545738
	6	Skin	Opening	Window	Wooden frame window	Side hung window 3-glass Alu - AFSC	timber	0.305956
	6	Skin	Opening	Window	Wooden frame window	Side hung window 3-glass Alu - AFSC	glass	0.73423
	6	Space	Wall	Finish 1	Plaster	13 mm thick lightweight plaster	plaster	1.4054
	6	Space	Wall	Intermediate finish 1	Timber	6.5 mm thick 35 mm wide timber laths	timber	0.22545
	6	Space	Wall	Non-Load Bearing Structure	Brick	215 mm thick brick	brick	67.7927
	6	Space	Wall	Intermediate support	Timber	140 mm thick studding at 600mm c/c spacing	timber studwork	1.77838
	6	Space	Wall	Intermediate finish 2	Timber	6.5 mm thick 35 mm wide timber laths	timber	0.22545
	6	Space	Wall	Finish 2	Plaster	13 mm thick dense plaster	plaster	3.04504
	6	Space	Floor	Finish 1	Floor finish	10 mm thick carpet/underlay	carpet/underlay	0.231
	6	Space	Floor	Intermediate finish 1	Timber	19 mm thick timber or chipboard	chipboard	1.3167
	6	Space	Floor	Finish 2	Plaster	13 mm thick lightweight plaster	plaster	0.9009
	6	Space	Opening	Door	Wooden Door	Forza FD60 Flush Solid Core Timber Door	timber	1.13994
	6	Services	Heating	Heat Source	Gas Boiler	20kW Mixed Wall mounted gas condensing boiler - MPX2 MI (FR)	steel	0.0181
	6	Services	Heating	Heat Source	Gas Boiler	20kW Mixed Wall mounted gas condensing boiler - MPX2 MI (FR)	aluminium	0.00193
	6	Services	Heating	Heat Source	Gas Boiler	20kW Mixed Wall mounted gas condensing boiler - MPX2 MI (FR)	brass	0.00135
	6	Services	Heating	Heat Source	Gas Boiler	20kW Mixed Wall mounted gas condensing boiler - MPX2 MI (FR)	plastic	0.00652
	6	Services	Heating	Emitter	Hot Water Radiator	1kW Classic Hot Water Radiator Range	steel	0.456382
	6	Services	Heating	Storage	Storage tank	300L ACV SMART E	steel	0.01442
	6	Services	Heating	Storage	Storage tank	300L ACV SMART E	stainless steel	0.00752
	6	Services	Heating	Storage	Storage tank	300L ACV SMART E	plastic	0.007012
	6	Services	Heating	Transportation	Heating pipe	15mm Copper Pipe 0.7mm thickness	copper	0.0213444
	6	Services	Electrical	Wiring	Electrical cable	1.5mm2 twin and earth cable	copper	0.00557172
	6	Services	Electrical	Wiring	Electrical cable	1.5mm2 twin and earth cable	plastic	0.00399168
	6	Services	Plumbing	Transportation	Plumbing pipe	110mm Plastic Soil Pipe 4.2 mm thickness	plastic	0.154428
	6	Skin	Floor	Intermediate finish 1	Timber	19 mm thick timber or chipboard	chipboard	1.3167
	6	Structure	Wall	Load bearing	Stone	600mm thick slate	slate	605.405
	6	Structure	Floor	Load bearing	Insitu Concrete	65 mm thick cast concrete	concrete	30.03
	6	Structure	Roof	Load bearing	Insitu Concrete	65 mm thick cast concrete	concrete	15.015
	6	Skin	Roof	Finish 1	Timber	19 mm thick timber or chipboard	chipboard	1.3167
	7	Skin	Wall	Internal finish	Plaster	13 mm thick lightweight plaster	plaster	2.81081
	7	Skin	Floor	Finish 1	Floor finish	10 mm thick carpet/underlay	carpet/underlay	0.231
	7	Skin	Floor	Intermediate finish 1	Screed	75 mm thick screed	screed	10.395
	7	Skin	Opening	Door	Wooden door	Rationel AURA / Rationel FORMA	timber	0.212035
	7	Skin	Opening	Door	Wooden door	Rationel AURA / Rationel FORMA	glass	0.318826
	7	Skin	Opening	Window	Composite frame window	SERIE STH ECO Â– WINDOW SYSTEM	timber	0.178721
	7	Skin	Opening	Window	Composite frame window	SERIE STH ECO Â– WINDOW SYSTEM	glass	0.762104
	7	Space	Wall	Finish 1	Plaster	13 mm thick dense plaster	plaster	3.04504
	7	Space	Wall	Intermediate finish 1	Timber	6.5 mm thick 35 mm wide timber laths	timber	0.22545
	7	Space	Wall	Non-Load Bearing Structure	Brick	105 mm thick brick	brick	33.1081
	7	Space	Wall	Intermediate support	Timber	140 mm thick studding at 600mm c/c spacing	timber studwork	1.77838
	7	Space	Wall	Intermediate finish 2	Timber	6.5 mm thick 35 mm wide timber laths	timber	0.22545
	7	Space	Wall	Finish 2	Plaster	13 mm thick dense plaster	plaster	3.04504
	7	Space	Floor	Finish 1	Floor finish	10 mm thick carpet/underlay	carpet/underlay	0.231
	7	Space	Floor	Intermediate finish 1	Timber	19 mm thick timber or chipboard	chipboard	1.3167
	7	Space	Floor	Finish 2	Plaster	13 mm thick lightweight plaster	plaster	0.9009
	7	Space	Opening	Door	Wooden Door	Forza FD60 Flush Solid Core Timber Door	timber	1.13994
	7	Services	Heating	Heat Source	Gas Boiler	24kW TZERRA Ace-Matic (BE)	steel	0.01267
	7	Services	Heating	Heat Source	Gas Boiler	24kW TZERRA Ace-Matic (BE)	stainless steel	0.01267
	7	Services	Heating	Heat Source	Gas Boiler	24kW TZERRA Ace-Matic (BE)	aluminium	0.00635
	7	Services	Heating	Heat Source	Gas Boiler	24kW TZERRA Ace-Matic (BE)	brass	0.00162
	7	Services	Heating	Heat Source	Gas Boiler	24kW TZERRA Ace-Matic (BE)	plastic	0.00694
	7	Services	Heating	Emitter	Hot Water Radiator	1kW Thermopanel V4	steel	0.462721
	7	Services	Heating	Emitter	Hot Water Radiator	1kW Thermopanel V4	brass	0.00203742
	7	Services	Heating	Emitter	Hot Water Radiator	1kW Thermopanel V4	plastic	0.00249018
	7	Services	Heating	Storage	Storage tank	300L ACV SMART E	steel	0.01442
	7	Services	Heating	Storage	Storage tank	300L ACV SMART E	stainless steel	0.00752
	7	Services	Heating	Storage	Storage tank	300L ACV SMART E	plastic	0.007012
	7	Services	Heating	Transportation	Heating pipe	22mm Plastic Pipe 2mm thickness	plastic	0.00670824
	7	Services	Electrical	Wiring	Electrical cable	1.5mm2 twin and earth cable	copper	0.00557172
	7	Services	Electrical	Wiring	Electrical cable	1.5mm2 twin and earth cable	plastic	0.00399168
	7	Services	Plumbing	Transportation	Plumbing pipe	160mm Plastic Soil Pipe 6.2 mm thickness	plastic	0.331309
	7	Structure	Wall	Load bearing	Brick	215 mm thick brick	brick	135.585
	7	Structure	Floor	Load bearing	Timber	200 mm thick timber joists at 600mm c/c spacing	timber	3.2571
	7	Structure	Roof	Load bearing	Timber	100 mm thick timber rafters at 600mm c/c spacing	timber	0.814275
	7	Skin	Roof	Finish 1	Timber	19 mm thick timber or chipboard	chipboard	1.3167
	8	Skin	Wall	Internal finish	Plaster	13 mm thick lightweight plaster	plaster	2.81081
	8	Skin	Floor	Finish 1	Floor finish	10 mm thick carpet/underlay	carpet/underlay	0.231
	8	Skin	Opening	Door	Wooden door	Rationel AURAPLUS / Rationel FORMAPLUS - glazed	timber	0.202749
	8	Skin	Opening	Door	Wooden door	Rationel AURAPLUS / Rationel FORMAPLUS - glazed	glass	0.317279
	8	Skin	Opening	Window	Composite frame window	Viking SW17 Aluclad Window Viking SW17 Wooden Window	timber	0.27054
	8	Skin	Opening	Window	Composite frame window	Viking SW17 Aluclad Window Viking SW17 Wooden Window	glass	0.757185
	8	Space	Wall	Finish 1	Plaster	13 mm thick lightweight plaster	plaster	1.4054
	8	Space	Wall	Intermediate finish 1	Timber	6.5 mm thick 35 mm wide timber laths	timber	0.22545
	8	Space	Wall	Non-Load Bearing Structure	Brick	105 mm thick brick	brick	33.1081
	8	Space	Wall	Intermediate support	Timber	25 mm thick timber battens at 600mm c/c spacing	timber studwork	0.317567
	8	Space	Wall	Intermediate finish 2	Timber	6.5 mm thick 35 mm wide timber laths	timber	0.22545
	8	Space	Wall	Finish 2	Plaster	13 mm thick lightweight plaster	plaster	1.4054
	8	Space	Floor	Finish 1	Floor finish	10 mm thick carpet/underlay	carpet/underlay	0.231
	8	Space	Floor	Intermediate finish 1	Timber	19 mm thick timber or chipboard	chipboard	1.3167
	8	Space	Floor	Finish 2	Plaster	13 mm thick lightweight plaster	plaster	0.9009
	8	Space	Opening	Door	Wooden Door	Forza FD60 Flush Solid Core Timber Door	timber	1.13994
	8	Services	Heating	Heat Source	Gas Boiler	24kW Mixed Wall mounted gas condensing boiler - MPX2 System (BE)	steel	0.01738
	8	Services	Heating	Heat Source	Gas Boiler	24kW Mixed Wall mounted gas condensing boiler - MPX2 System (BE)	aluminium	0.00193
	8	Services	Heating	Heat Source	Gas Boiler	24kW Mixed Wall mounted gas condensing boiler - MPX2 System (BE)	copper	0.00111
	8	Services	Heating	Heat Source	Gas Boiler	24kW Mixed Wall mounted gas condensing boiler - MPX2 System (BE)	brass	0.00113
	8	Services	Heating	Heat Source	Gas Boiler	24kW Mixed Wall mounted gas condensing boiler - MPX2 System (BE)	plastic	0.00659
	8	Services	Heating	Emitter	Hot Water Radiator	1kW Classic Hot Water Radiator Range	steel	0.456382
	8	Services	Heating	Storage	Storage tank	300L Atlantic Mileo + 300	stainless steel	0.01382
	8	Services	Heating	Storage	Storage tank	300L Atlantic Mileo + 300	plastic	0.01244
	8	Services	Heating	Transportation	Heating pipe	22mm Copper Pipe 0.9mm thickness	copper	0.0404019
	8	Services	Electrical	Wiring	Electrical cable	2.5mm2 twin and earth cable	copper	0.00823284
	8	Services	Electrical	Wiring	Electrical cable	2.5mm2 twin and earth cable	plastic	0.00590436
	8	Services	Plumbing	Transportation	Plumbing pipe	110mm Plastic Soil Pipe 4.2 mm thickness	plastic	0.154428
	8	Skin	Floor	Intermediate finish 1	Timber	19 mm thick timber or chipboard	chipboard	1.3167
	8	Structure	Wall	Load bearing	Stone	600mm thick limestone	limestone	475.675
	8	Structure	Floor	Load bearing	Timber	150 mm thick timber joists at 600mm c/c spacing	timber	2.44283
	8	Structure	Roof	Load bearing	Timber	125 mm thick timber rafters at 600mm c/c spacing	timber	1.01784
	8	Skin	Roof	Finish 1	Timber	19 mm thick timber or chipboard	chipboard	1.3167
	9	Skin	Wall	Internal finish	Plaster	13 mm thick lightweight plaster	plaster	2.81081
	9	Skin	Floor	Finish 1	Floor finish	10 mm thick carpet/underlay	carpet/underlay	0.231
	9	Skin	Floor	Intermediate finish 1	Screed	50 mm thick screed	screed	6.93
	9	Skin	Opening	Door	Wooden door	ST10 Ei30 RW43 RC2 with glass	timber	0.46897
	9	Skin	Opening	Door	Wooden door	ST10 Ei30 RW43 RC2 with glass	glass	0.157658
	9	Skin	Opening	Window	Metal frame window	forster unico Windows	glass	1.62547
	9	Space	Wall	Finish 1	Plaster	13 mm thick dense plaster	plaster	3.04504
	9	Space	Wall	Intermediate finish 1	Timber	6.5 mm thick 35 mm wide timber laths	timber	0.22545
	9	Space	Wall	Non-Load Bearing Structure	Brick	220 mm thick brick	brick	69.3693
	9	Space	Wall	Intermediate support	Timber	140 mm thick studding at 600mm c/c spacing	timber studwork	1.77838
	9	Space	Wall	Intermediate finish 2	Timber	6.5 mm thick 35 mm wide timber laths	timber	0.22545
	9	Space	Wall	Finish 2	Plaster	13 mm thick dense plaster	plaster	3.04504
	9	Space	Floor	Finish 1	Floor finish	10 mm thick carpet/underlay	carpet/underlay	0.231
	9	Space	Floor	Intermediate finish 1	Timber	19 mm thick timber or chipboard	chipboard	1.3167
	9	Space	Floor	Finish 2	Plaster	13 mm thick lightweight plaster	plaster	0.9009
	9	Space	Opening	Door	Wooden Door	Forza FD60 Flush Solid Core Timber Door	timber	1.13994
	9	Services	Heating	Heat Source	Gas Boiler	24kW Mixed Wall mounted gas condensing boiler - MCR-S	steel	0.01081
	9	Services	Heating	Heat Source	Gas Boiler	24kW Mixed Wall mounted gas condensing boiler - MCR-S	stainless steel	0.0076
	9	Services	Heating	Heat Source	Gas Boiler	24kW Mixed Wall mounted gas condensing boiler - MCR-S	aluminium	0.00168
	9	Services	Heating	Heat Source	Gas Boiler	24kW Mixed Wall mounted gas condensing boiler - MCR-S	plastic	0.00667
	9	Services	Heating	Emitter	Hot Water Radiator	1kW Therma Hot Water Radiator Range	steel	0.567308
	9	Services	Heating	Storage	Storage tank	300L Atlantic Mileo + 300	stainless steel	0.01382
	9	Services	Heating	Storage	Storage tank	300L Atlantic Mileo + 300	plastic	0.01244
	9	Services	Heating	Transportation	Heating pipe	15mm Plastic Pipe 1.5mm thickness	plastic	0.00647955
	9	Services	Electrical	Wiring	Electrical cable	2.5mm2 twin and earth cable	copper	0.00823284
	9	Services	Electrical	Wiring	Electrical cable	2.5mm2 twin and earth cable	plastic	0.00590436
	9	Services	Plumbing	Transportation	Plumbing pipe	110mm Plastic Soil Pipe 4.2 mm thickness	plastic	0.154428
	9	Structure	Wall	Load bearing	Stone	600mm thick granite	granite	562.162
	9	Structure	Floor	Load bearing	Insitu Concrete	65 mm thick cast concrete	concrete	30.03
	9	Structure	Roof	Load bearing	Insitu Concrete	80 mm thick concrete	concrete	18.48
	9	Skin	Roof	Finish 1	Timber	19 mm thick timber or chipboard	chipboard	1.3167
	10	Skin	Wall	Internal finish	Plaster	13 mm thick dense plaster	plaster	6.09008
	10	Skin	Floor	Finish 1	Floor finish	10 mm thick carpet/underlay	carpet/underlay	0.231
	10	Skin	Opening	Door	Steel door	Steel doors S30/Y30 - S63/Y63	timber	0.00545738
	10	Skin	Opening	Window	Metal frame window	forster unico Windows	glass	1.62547
	10	Space	Wall	Finish 1	Plaster	13 mm thick dense plaster	plaster	3.04504
	10	Space	Wall	Intermediate finish 1	Timber	6.5 mm thick 35 mm wide timber laths	timber	0.22545
	10	Space	Wall	Non-Load Bearing Structure	Brick	105 mm thick brick	brick	33.1081
	10	Space	Wall	Intermediate support	Timber	140 mm thick studding at 600mm c/c spacing	timber studwork	1.77838
	10	Space	Wall	Intermediate finish 2	Timber	6.5 mm thick 35 mm wide timber laths	timber	0.22545
	10	Space	Wall	Finish 2	Plaster	13 mm thick lightweight plaster	plaster	1.4054
	10	Space	Floor	Finish 1	Floor finish	10 mm thick carpet/underlay	carpet/underlay	0.231
	10	Space	Floor	Intermediate finish 1	Timber	19 mm thick timber or chipboard	chipboard	1.3167
	10	Space	Floor	Finish 2	Plaster	13 mm thick dense plaster	plaster	1.95195
	10	Space	Opening	Door	Wooden Door	Forza FD60 Flush Solid Core Timber Door	timber	1.13994
	10	Services	Heating	Heat Source	Gas Boiler	25kW ecoTEC plus VUW 25/32CS/1-5 (N-FR)	steel	0.01556
	10	Services	Heating	Heat Source	Gas Boiler	25kW ecoTEC plus VUW 25/32CS/1-5 (N-FR)	stainless steel	0.0094
	10	Services	Heating	Heat Source	Gas Boiler	25kW ecoTEC plus VUW 25/32CS/1-5 (N-FR)	aluminium	0.00245
	10	Services	Heating	Heat Source	Gas Boiler	25kW ecoTEC plus VUW 25/32CS/1-5 (N-FR)	copper	0.00275
	10	Services	Heating	Heat Source	Gas Boiler	25kW ecoTEC plus VUW 25/32CS/1-5 (N-FR)	brass	0.00269
	10	Services	Heating	Heat Source	Gas Boiler	25kW ecoTEC plus VUW 25/32CS/1-5 (N-FR)	plastic	0.00355
	10	Services	Heating	Emitter	Hot Water Radiator	1kW Fassane Pack double Ã ailettes	steel	0.707211
	10	Services	Heating	Emitter	Hot Water Radiator	1kW Fassane Pack double Ã ailettes	brass	0.0022638
	10	Services	Heating	Emitter	Hot Water Radiator	1kW Fassane Pack double Ã ailettes	plastic	0.00543312
	10	Services	Heating	Storage	Storage tank	300L ACV SMART E	steel	0.01442
	10	Services	Heating	Storage	Storage tank	300L ACV SMART E	stainless steel	0.00752
	10	Services	Heating	Storage	Storage tank	300L ACV SMART E	plastic	0.007012
	10	Services	Heating	Transportation	Heating pipe	22mm Copper Pipe 0.9mm thickness	copper	0.0404019
	10	Services	Electrical	Wiring	Electrical cable	1.5mm2 twin and earth cable	copper	0.00557172
	10	Services	Electrical	Wiring	Electrical cable	1.5mm2 twin and earth cable	plastic	0.00399168
	10	Services	Plumbing	Transportation	Plumbing pipe	40mm Plastic Waste Pipe 1.9 mm thickness	plastic	0.0251143
	10	Skin	Floor	Intermediate finish 1	Timber	19 mm thick timber or chipboard	chipboard	1.3167
	10	Structure	Wall	Load bearing	Brick	105 mm thick brick	brick	66.2161
	10	Structure	Floor	Load bearing	Timber	100 mm thick timber joists at 600mm c/c spacing	timber	1.62855
	10	Structure	Roof	Load bearing	Insitu Concrete	65 mm thick cast concrete	concrete	15.015
	10	Skin	Roof	Finish 1	Timber	19 mm thick timber or chipboard	chipboard	1.3167
	11	Skin	Wall	Internal finish	Plaster	13 mm thick dense plaster	plaster	6.09008
	11	Skin	Floor	Finish 1	Floor finish	10 mm thick carpet/underlay	carpet/underlay	0.231
	11	Skin	Opening	Door	Steel door	Steel doors S30/Y30 - S63/Y63	timber	0.00545738
	11	Skin	Opening	Window	Metal frame window	hinged windows, series ITESAL 45, coated	glass	0.406126
	11	Space	Wall	Finish 1	Plaster	13 mm thick dense plaster	plaster	3.04504
	11	Space	Wall	Intermediate finish 1	Timber	6.5 mm thick 35 mm wide timber laths	timber	0.22545
	11	Space	Wall	Non-Load Bearing Structure	Brick	215 mm thick brick	brick	67.7927
	11	Space	Wall	Intermediate support	Timber	25 mm thick timber battens at 600mm c/c spacing	timber studwork	0.317567
	11	Space	Wall	Intermediate finish 2	Timber	6.5 mm thick 35 mm wide timber laths	timber	0.22545
	11	Space	Wall	Finish 2	Plaster	13 mm thick dense plaster	plaster	3.04504
	11	Space	Floor	Finish 1	Floor finish	10 mm thick carpet/underlay	carpet/underlay	0.231
	11	Space	Floor	Intermediate finish 1	Timber	19 mm thick timber or chipboard	chipboard	1.3167
	11	Space	Floor	Finish 2	Plaster	13 mm thick lightweight plaster	plaster	0.9009
	11	Space	Opening	Door	Wooden Door	Forza FD60 Flush Solid Core Timber Door	timber	1.13994
	11	Services	Heating	Heat Source	Gas Boiler	24kW Mixed Wall mounted gas condensing boiler - MCR-S	steel	0.01081
	11	Services	Heating	Heat Source	Gas Boiler	24kW Mixed Wall mounted gas condensing boiler - MCR-S	stainless steel	0.0076
	11	Services	Heating	Heat Source	Gas Boiler	24kW Mixed Wall mounted gas condensing boiler - MCR-S	aluminium	0.00168
	11	Services	Heating	Heat Source	Gas Boiler	24kW Mixed Wall mounted gas condensing boiler - MCR-S	plastic	0.00667
	11	Services	Heating	Emitter	Hot Water Radiator	1kW Therma Hot Water Radiator Range	steel	0.567308
	11	Services	Heating	Storage	Storage tank	300L ACV SMART E	steel	0.01442
	11	Services	Heating	Storage	Storage tank	300L ACV SMART E	stainless steel	0.00752
	11	Services	Heating	Storage	Storage tank	300L ACV SMART E	plastic	0.007012
	11	Services	Heating	Transportation	Heating pipe	22mm Copper Pipe 0.9mm thickness	copper	0.0404019
	11	Services	Electrical	Wiring	Electrical cable	2.5mm2 twin and earth cable	copper	0.00823284
	11	Services	Electrical	Wiring	Electrical cable	2.5mm2 twin and earth cable	plastic	0.00590436
	11	Services	Plumbing	Transportation	Plumbing pipe	160mm Plastic Soil Pipe 6.2 mm thickness	plastic	0.331309
	11	Skin	Floor	Intermediate finish 1	Timber	19 mm thick timber or chipboard	chipboard	1.3167
	11	Structure	Wall	Load bearing	Brick	220 mm thick brick	brick	138.739
	11	Structure	Floor	Load bearing	Insitu Concrete	150 mm thick cast concrete	concrete	69.3
	11	Structure	Roof	Load bearing	Timber	125 mm thick timber rafters at 600mm c/c spacing	timber	1.01784
	11	Skin	Roof	Finish 1	Timber	19 mm thick timber or chipboard	chipboard	1.3167
	12	Skin	Wall	Internal finish	Plaster	13 mm thick dense plaster	plaster	6.09008
	12	Skin	Floor	Finish 1	Floor finish	10 mm thick carpet/underlay	carpet/underlay	0.231
	12	Skin	Opening	Door	Wooden door	ST10 Ei30 RW43 RC2 with glass	timber	0.46897
	12	Skin	Opening	Door	Wooden door	ST10 Ei30 RW43 RC2 with glass	glass	0.157658
	12	Skin	Opening	Window	Metal frame window	forster unico Windows	glass	1.62547
	12	Space	Wall	Finish 1	Plaster	13 mm thick lightweight plaster	plaster	1.4054
	12	Space	Wall	Intermediate finish 1	Timber	6.5 mm thick 35 mm wide timber laths	timber	0.22545
	12	Space	Wall	Non-Load Bearing Structure	Brick	105 mm thick brick	brick	33.1081
	12	Space	Wall	Intermediate support	Timber	95 mm thick studding at 600mm c/c spacing	timber studwork	1.20676
	12	Space	Wall	Intermediate finish 2	Timber	6.5 mm thick 35 mm wide timber laths	timber	0.22545
	12	Space	Wall	Finish 2	Plaster	13 mm thick lightweight plaster	plaster	1.4054
	12	Space	Floor	Finish 1	Floor finish	10 mm thick carpet/underlay	carpet/underlay	0.231
	12	Space	Floor	Intermediate finish 1	Timber	19 mm thick timber or chipboard	chipboard	1.3167
	12	Space	Floor	Finish 2	Plaster	13 mm thick dense plaster	plaster	1.95195
	12	Space	Opening	Door	Wooden Door	Forza FD60 Flush Solid Core Timber Door	timber	1.13994
	12	Services	Heating	Heat Source	Gas Boiler	24kW TZERRA Ace-Matic (BE)	steel	0.01267
	12	Services	Heating	Heat Source	Gas Boiler	24kW TZERRA Ace-Matic (BE)	stainless steel	0.01267
	12	Services	Heating	Heat Source	Gas Boiler	24kW TZERRA Ace-Matic (BE)	aluminium	0.00635
	12	Services	Heating	Heat Source	Gas Boiler	24kW TZERRA Ace-Matic (BE)	brass	0.00162
	12	Services	Heating	Heat Source	Gas Boiler	24kW TZERRA Ace-Matic (BE)	plastic	0.00694
	12	Services	Heating	Emitter	Hot Water Radiator	1kW Thermopanel V4	steel	0.462721
	12	Services	Heating	Emitter	Hot Water Radiator	1kW Thermopanel V4	brass	0.00203742
	12	Services	Heating	Emitter	Hot Water Radiator	1kW Thermopanel V4	plastic	0.00249018
	12	Services	Heating	Storage	Storage tank	300L Atlantic Mileo + 300	stainless steel	0.01382
	12	Services	Heating	Storage	Storage tank	300L Atlantic Mileo + 300	plastic	0.01244
	12	Services	Heating	Transportation	Heating pipe	22mm Copper Pipe 0.9mm thickness	copper	0.0404019
	12	Services	Electrical	Wiring	Electrical cable	1.5mm2 twin and earth cable	copper	0.00557172
	12	Services	Electrical	Wiring	Electrical cable	1.5mm2 twin and earth cable	plastic	0.00399168
	12	Services	Plumbing	Transportation	Plumbing pipe	40mm Plastic Waste Pipe 1.9 mm thickness	plastic	0.0251143
	12	Skin	Floor	Intermediate finish 1	Timber	19 mm thick timber or chipboard	chipboard	1.3167
	12	Structure	Wall	Load bearing	Brick	220 mm thick brick	brick	138.739
	12	Structure	Floor	Load bearing	Timber	200 mm thick timber joists at 600mm c/c spacing	timber	3.2571
	12	Structure	Roof	Load bearing	Timber	125 mm thick timber rafters at 600mm c/c spacing	timber	1.01784
	12	Skin	Roof	Finish 1	Timber	19 mm thick timber or chipboard	chipboard	1.3167
	13	Skin	Wall	Internal finish	Plaster	13 mm thick lightweight plaster	plaster	2.81081
	13	Skin	Floor	Finish 1	Floor finish	10 mm thick carpet/underlay	carpet/underlay	0.231
	13	Skin	Floor	Intermediate finish 1	Screed	75 mm thick screed	screed	10.395
	13	Skin	Opening	Door	Wooden door	OPUS Wooden Front Doors	timber	0.447505
	13	Skin	Opening	Window	Metal frame window	hinged windows, series ITESAL 45, coated	glass	0.406126
	13	Space	Wall	Finish 1	Plaster	13 mm thick lightweight plaster	plaster	1.4054
	13	Space	Wall	Intermediate finish 1	Timber	6.5 mm thick 35 mm wide timber laths	timber	0.22545
	13	Space	Wall	Non-Load Bearing Structure	Brick	215 mm thick brick	brick	67.7927
	13	Space	Wall	Intermediate support	Timber	140 mm thick studding at 600mm c/c spacing	timber studwork	1.77838
	13	Space	Wall	Intermediate finish 2	Timber	6.5 mm thick 35 mm wide timber laths	timber	0.22545
	13	Space	Wall	Finish 2	Plaster	13 mm thick dense plaster	plaster	3.04504
	13	Space	Floor	Finish 1	Floor finish	10 mm thick carpet/underlay	carpet/underlay	0.231
	13	Space	Floor	Intermediate finish 1	Screed	50 mm thick screed	screed	6.93
	13	Space	Floor	Finish 2	Plaster	13 mm thick lightweight plaster	plaster	0.9009
	13	Space	Opening	Door	Wooden Door	Forza FD60 Flush Solid Core Timber Door	timber	1.13994
	13	Services	Heating	Heat Source	Gas Boiler	25kW ecoTEC plus systÃ¨me VU 25 CS/1-5 (N-FR)	steel	0.01545
	13	Services	Heating	Heat Source	Gas Boiler	25kW ecoTEC plus systÃ¨me VU 25 CS/1-5 (N-FR)	stainless steel	0.00941
	13	Services	Heating	Heat Source	Gas Boiler	25kW ecoTEC plus systÃ¨me VU 25 CS/1-5 (N-FR)	aluminium	0.00247
	13	Services	Heating	Heat Source	Gas Boiler	25kW ecoTEC plus systÃ¨me VU 25 CS/1-5 (N-FR)	copper	0.00234
	13	Services	Heating	Heat Source	Gas Boiler	25kW ecoTEC plus systÃ¨me VU 25 CS/1-5 (N-FR)	brass	0.00229
	13	Services	Heating	Heat Source	Gas Boiler	25kW ecoTEC plus systÃ¨me VU 25 CS/1-5 (N-FR)	plastic	0.00383
	13	Services	Heating	Emitter	Hot Water Radiator	1kW Galant Hot Water Radiator Range	steel	0.678234
	13	Services	Heating	Storage	Storage tank	300L Atlantic Mileo + 300	stainless steel	0.01382
	13	Services	Heating	Storage	Storage tank	300L Atlantic Mileo + 300	plastic	0.01244
	13	Services	Heating	Transportation	Heating pipe	22mm Plastic Pipe 2mm thickness	plastic	0.00670824
	13	Services	Electrical	Wiring	Electrical cable	2.5mm2 twin and earth cable	copper	0.00823284
	13	Services	Electrical	Wiring	Electrical cable	2.5mm2 twin and earth cable	plastic	0.00590436
	13	Services	Plumbing	Transportation	Plumbing pipe	160mm Plastic Soil Pipe 6.2 mm thickness	plastic	0.331309
	13	Structure	Wall	Load bearing	Brick	215 mm thick brick	brick	135.585
	13	Structure	Floor	Load bearing	Timber	225 mm thick timber joists at 600mm c/c spacing	timber	3.66424
	13	Structure	Roof	Load bearing	Insitu Concrete	150 mm thick cast concrete	concrete	34.65
	13	Skin	Roof	Finish 1	Timber	19 mm thick timber or chipboard	chipboard	1.3167
	14	Skin	Wall	Internal finish	Plaster	13 mm thick dense plaster	plaster	6.09008
	14	Skin	Floor	Finish 1	Floor finish	10 mm thick carpet/underlay	carpet/underlay	0.231
	14	Skin	Opening	Door	Steel door	Steel doors S30/Y30 - S63/Y63	timber	0.00545738
	14	Skin	Opening	Window	Metal frame window	hinged windows, series ITESAL 45, coated	glass	0.406126
	14	Space	Wall	Finish 1	Plaster	13 mm thick dense plaster	plaster	3.04504
	14	Space	Wall	Intermediate finish 1	Timber	6.5 mm thick 35 mm wide timber laths	timber	0.22545
	14	Space	Wall	Non-Load Bearing Structure	Brick	220 mm thick brick	brick	69.3693
	14	Space	Wall	Intermediate support	Timber	25 mm thick timber battens at 600mm c/c spacing	timber studwork	0.317567
	14	Space	Wall	Intermediate finish 2	Timber	6.5 mm thick 35 mm wide timber laths	timber	0.22545
	14	Space	Wall	Finish 2	Plaster	13 mm thick dense plaster	plaster	3.04504
	14	Space	Floor	Finish 1	Floor finish	10 mm thick carpet/underlay	carpet/underlay	0.231
	14	Space	Floor	Intermediate finish 1	Screed	50 mm thick screed	screed	6.93
	14	Space	Floor	Finish 2	Plaster	13 mm thick lightweight plaster	plaster	0.9009
	14	Space	Opening	Door	Wooden Door	Forza FD60 Flush Solid Core Timber Door	timber	1.13994
	14	Services	Heating	Heat Source	Gas Boiler	25kW ThermaFast Condens 31	steel	0.0167
	14	Services	Heating	Heat Source	Gas Boiler	25kW ThermaFast Condens 31	aluminium	0.00249
	14	Services	Heating	Heat Source	Gas Boiler	25kW ThermaFast Condens 31	copper	0.00365
	14	Services	Heating	Heat Source	Gas Boiler	25kW ThermaFast Condens 31	brass	0.00288
	14	Services	Heating	Heat Source	Gas Boiler	25kW ThermaFast Condens 31	plastic	0.00237
	14	Services	Heating	Emitter	Hot Water Radiator	1kW Fassane Pack double Ã ailettes	steel	0.707211
	14	Services	Heating	Emitter	Hot Water Radiator	1kW Fassane Pack double Ã ailettes	brass	0.0022638
	14	Services	Heating	Emitter	Hot Water Radiator	1kW Fassane Pack double Ã ailettes	plastic	0.00543312
	14	Services	Heating	Storage	Storage tank	300L Atlantic Mileo + 300	stainless steel	0.01382
	14	Services	Heating	Storage	Storage tank	300L Atlantic Mileo + 300	plastic	0.01244
	14	Services	Heating	Transportation	Heating pipe	22mm Plastic Pipe 2mm thickness	plastic	0.00670824
	14	Services	Electrical	Wiring	Electrical cable	1.5mm2 twin and earth cable	copper	0.00557172
	14	Services	Electrical	Wiring	Electrical cable	1.5mm2 twin and earth cable	plastic	0.00399168
	14	Services	Plumbing	Transportation	Plumbing pipe	32mm Plastic Waste Pipe 1.8 mm thickness	plastic	0.0188773
	14	Skin	Floor	Intermediate finish 1	Timber	19 mm thick timber or chipboard	chipboard	1.3167
	14	Structure	Wall	Load bearing	Brick	105 mm thick brick	brick	66.2161
	14	Structure	Floor	Load bearing	Timber	150 mm thick timber joists at 600mm c/c spacing	timber	2.44283
	14	Structure	Roof	Load bearing	Timber	35 mm thick fink truss at 600mm c/c spacing	timber	1.32132
	14	Skin	Roof	Finish 1	Timber	19 mm thick timber or chipboard	chipboard	1.3167
	15	Skin	Wall	Internal finish	Plaster	13 mm thick dense plaster	plaster	6.09008
	15	Skin	Floor	Finish 1	Floor finish	10 mm thick carpet/underlay	carpet/underlay	0.231
	15	Skin	Opening	Door	Steel door	Steel doors S30/Y30 - S63/Y63	timber	0.00545738
	15	Skin	Opening	Window	Metal frame window	forster unico Windows	glass	1.62547
	15	Space	Wall	Finish 1	Plaster	13 mm thick lightweight plaster	plaster	1.4054
	15	Space	Wall	Intermediate finish 1	Timber	6.5 mm thick 35 mm wide timber laths	timber	0.22545
	15	Space	Wall	Non-Load Bearing Structure	Brick	215 mm thick brick	brick	67.7927
	15	Space	Wall	Intermediate support	Timber	95 mm thick studding at 600mm c/c spacing	timber studwork	1.20676
	15	Space	Wall	Intermediate finish 2	Timber	6.5 mm thick 35 mm wide timber laths	timber	0.22545
	15	Space	Wall	Finish 2	Plaster	13 mm thick dense plaster	plaster	3.04504
	15	Space	Floor	Finish 1	Floor finish	10 mm thick carpet/underlay	carpet/underlay	0.231
	15	Space	Floor	Intermediate finish 1	Screed	75 mm thick screed	screed	10.395
	15	Space	Floor	Finish 2	Plaster	13 mm thick dense plaster	plaster	1.95195
	15	Space	Opening	Door	Wooden Door	Forza FD60 Flush Solid Core Timber Door	timber	1.13994
	15	Services	Heating	Heat Source	Gas Boiler	12.25kW Condensing Boiler Alteas one + Net 24	steel	0.01852
	15	Services	Heating	Heat Source	Gas Boiler	12.25kW Condensing Boiler Alteas one + Net 24	aluminium	0.00173
	15	Services	Heating	Heat Source	Gas Boiler	12.25kW Condensing Boiler Alteas one + Net 24	copper	0.00193
	15	Services	Heating	Heat Source	Gas Boiler	12.25kW Condensing Boiler Alteas one + Net 24	glass	0.00278
	15	Services	Heating	Heat Source	Gas Boiler	12.25kW Condensing Boiler Alteas one + Net 24	plastic	0.0041
	15	Services	Heating	Emitter	Hot Water Radiator	1kW Classic Hot Water Radiator Range	steel	0.456382
	15	Services	Heating	Storage	Storage tank	300L Atlantic Mileo + 300	stainless steel	0.01382
	15	Services	Heating	Storage	Storage tank	300L Atlantic Mileo + 300	plastic	0.01244
	15	Services	Heating	Transportation	Heating pipe	22mm Plastic Pipe 2mm thickness	plastic	0.00670824
	15	Services	Electrical	Wiring	Electrical cable	2.5mm2 twin and earth cable	copper	0.00823284
	15	Services	Electrical	Wiring	Electrical cable	2.5mm2 twin and earth cable	plastic	0.00590436
	15	Services	Plumbing	Transportation	Plumbing pipe	110mm Plastic Soil Pipe 4.2 mm thickness	plastic	0.154428
	15	Skin	Floor	Intermediate finish 1	Timber	19 mm thick timber or chipboard	chipboard	1.3167
	15	Structure	Wall	Load bearing	Stone	600mm thick limestone	limestone	475.675
	15	Structure	Floor	Load bearing	Insitu Concrete	65 mm thick cast concrete	concrete	30.03
	15	Structure	Roof	Load bearing	Insitu Concrete	65 mm thick cast concrete	concrete	15.015
	15	Skin	Roof	Finish 1	Timber	19 mm thick timber or chipboard	chipboard	1.3167
	16	Skin	Wall	Internal finish	Plaster	13 mm thick dense plaster	plaster	6.09008
	16	Skin	Floor	Finish 1	Floor finish	10 mm thick carpet/underlay	carpet/underlay	0.231
	16	Skin	Opening	Door	Wooden door	OPUS Wooden Front Doors	timber	0.447505
	16	Skin	Opening	Window	Composite frame window	Side-hung window 2+1 Kipp/Dreh - IKL-AL	timber	0.126908
	16	Skin	Opening	Window	Composite frame window	Side-hung window 2+1 Kipp/Dreh - IKL-AL	glass	0.736197
	16	Space	Wall	Finish 1	Plaster	13 mm thick dense plaster	plaster	3.04504
	16	Space	Wall	Intermediate finish 1	Timber	6.5 mm thick 35 mm wide timber laths	timber	0.22545
	16	Space	Wall	Non-Load Bearing Structure	Brick	220 mm thick brick	brick	69.3693
	16	Space	Wall	Intermediate support	Timber	140 mm thick studding at 600mm c/c spacing	timber studwork	1.77838
	16	Space	Wall	Intermediate finish 2	Timber	6.5 mm thick 35 mm wide timber laths	timber	0.22545
	16	Space	Wall	Finish 2	Plaster	13 mm thick lightweight plaster	plaster	1.4054
	16	Space	Floor	Finish 1	Floor finish	10 mm thick carpet/underlay	carpet/underlay	0.231
	16	Space	Floor	Intermediate finish 1	Timber	19 mm thick timber or chipboard	chipboard	1.3167
	16	Space	Floor	Finish 2	Plaster	13 mm thick dense plaster	plaster	1.95195
	16	Space	Opening	Door	Wooden Door	Forza FD60 Flush Solid Core Timber Door	timber	1.13994
	16	Services	Heating	Heat Source	Gas Boiler	25kW ecoTEC plus VUW 25/32CS/1-5 (N-FR)	steel	0.01556
	16	Services	Heating	Heat Source	Gas Boiler	25kW ecoTEC plus VUW 25/32CS/1-5 (N-FR)	stainless steel	0.0094
	16	Services	Heating	Heat Source	Gas Boiler	25kW ecoTEC plus VUW 25/32CS/1-5 (N-FR)	aluminium	0.00245
	16	Services	Heating	Heat Source	Gas Boiler	25kW ecoTEC plus VUW 25/32CS/1-5 (N-FR)	copper	0.00275
	16	Services	Heating	Heat Source	Gas Boiler	25kW ecoTEC plus VUW 25/32CS/1-5 (N-FR)	brass	0.00269
	16	Services	Heating	Heat Source	Gas Boiler	25kW ecoTEC plus VUW 25/32CS/1-5 (N-FR)	plastic	0.00355
	16	Services	Heating	Emitter	Hot Water Radiator	1kW Classic Hot Water Radiator Range	steel	0.456382
	16	Services	Heating	Storage	Storage tank	300L Atlantic Mileo + 300	stainless steel	0.01382
	16	Services	Heating	Storage	Storage tank	300L Atlantic Mileo + 300	plastic	0.01244
	16	Services	Heating	Transportation	Heating pipe	15mm Copper Pipe 0.7mm thickness	copper	0.0213444
	16	Services	Electrical	Wiring	Electrical cable	1.5mm2 twin and earth cable	copper	0.00557172
	16	Services	Electrical	Wiring	Electrical cable	1.5mm2 twin and earth cable	plastic	0.00399168
	16	Services	Plumbing	Transportation	Plumbing pipe	110mm Plastic Soil Pipe 4.2 mm thickness	plastic	0.154428
	16	Skin	Floor	Intermediate finish 1	Timber	19 mm thick timber or chipboard	chipboard	1.3167
	16	Structure	Wall	Load bearing	Brick	220 mm thick brick	brick	138.739
	16	Structure	Floor	Load bearing	Insitu Concrete	65 mm thick cast concrete	concrete	30.03
	16	Structure	Roof	Load bearing	Timber	35 mm thick fink truss at 600mm c/c spacing	timber	1.32132
	16	Skin	Roof	Finish 1	Timber	19 mm thick timber or chipboard	chipboard	1.3167
	17	Skin	Wall	Internal finish	Plaster	13 mm thick lightweight plaster	plaster	2.81081
	17	Skin	Floor	Finish 1	Floor finish	10 mm thick carpet/underlay	carpet/underlay	0.231
	17	Skin	Floor	Intermediate finish 1	Screed	75 mm thick screed	screed	10.395
	17	Skin	Opening	Door	Steel door	Steel doors S30/Y30 - S63/Y63	timber	0.00545738
	17	Skin	Opening	Window	Wooden frame window	VELFAC Classic woodÂ–Top-guided window	timber	0.343012
	17	Skin	Opening	Window	Wooden frame window	VELFAC Classic woodÂ–Top-guided window	glass	0.723736
	17	Space	Wall	Finish 1	Plaster	13 mm thick lightweight plaster	plaster	1.4054
	17	Space	Wall	Intermediate finish 1	Timber	6.5 mm thick 35 mm wide timber laths	timber	0.22545
	17	Space	Wall	Non-Load Bearing Structure	Brick	220 mm thick brick	brick	69.3693
	17	Space	Wall	Intermediate support	Timber	95 mm thick studding at 600mm c/c spacing	timber studwork	1.20676
	17	Space	Wall	Intermediate finish 2	Timber	6.5 mm thick 35 mm wide timber laths	timber	0.22545
	17	Space	Wall	Finish 2	Plaster	13 mm thick lightweight plaster	plaster	1.4054
	17	Space	Floor	Finish 1	Floor finish	10 mm thick carpet/underlay	carpet/underlay	0.231
	17	Space	Floor	Intermediate finish 1	Timber	19 mm thick timber or chipboard	chipboard	1.3167
	17	Space	Floor	Finish 2	Plaster	13 mm thick lightweight plaster	plaster	0.9009
	17	Space	Opening	Door	Wooden Door	Forza FD60 Flush Solid Core Timber Door	timber	1.13994
	17	Services	Heating	Heat Source	Gas Boiler	18.5kW Naia 3 micro 25	steel	0.00528
	17	Services	Heating	Heat Source	Gas Boiler	18.5kW Naia 3 micro 25	stainless steel	0.00513
	17	Services	Heating	Heat Source	Gas Boiler	18.5kW Naia 3 micro 25	aluminium	0.0018
	17	Services	Heating	Heat Source	Gas Boiler	18.5kW Naia 3 micro 25	plastic	0.00538
	17	Services	Heating	Emitter	Hot Water Radiator	1kW Classic Hot Water Radiator Range	steel	0.456382
	17	Services	Heating	Storage	Storage tank	300L ACV SMART E	steel	0.01442
	17	Services	Heating	Storage	Storage tank	300L ACV SMART E	stainless steel	0.00752
	17	Services	Heating	Storage	Storage tank	300L ACV SMART E	plastic	0.007012
	17	Services	Heating	Transportation	Heating pipe	15mm Copper Pipe 0.7mm thickness	copper	0.0213444
	17	Services	Electrical	Wiring	Electrical cable	2.5mm2 twin and earth cable	copper	0.00823284
	17	Services	Electrical	Wiring	Electrical cable	2.5mm2 twin and earth cable	plastic	0.00590436
	17	Services	Plumbing	Transportation	Plumbing pipe	50mm Plastic Waste Pipe 2.4 mm thickness	plastic	0.0396673
	17	Structure	Wall	Load bearing	Stone	600mm thick granite	granite	562.162
	17	Structure	Floor	Load bearing	Timber	100 mm thick timber joists at 600mm c/c spacing	timber	1.62855
	17	Structure	Roof	Load bearing	Insitu Concrete	65 mm thick cast concrete	concrete	15.015
	17	Skin	Roof	Finish 1	Timber	19 mm thick timber or chipboard	chipboard	1.3167
	18	Skin	Wall	Internal finish	Plaster	13 mm thick lightweight plaster	plaster	2.81081
	18	Skin	Floor	Finish 1	Floor finish	10 mm thick carpet/underlay	carpet/underlay	0.231
	18	Skin	Floor	Intermediate finish 1	Screed	50 mm thick screed	screed	6.93
	18	Skin	Opening	Door	Steel door	Steel doors S30/Y30 - S63/Y63	timber	0.00545738
	18	Skin	Opening	Window	Wooden frame window	VELFAC Classic woodÂ–Top-guided window	timber	0.343012
	18	Skin	Opening	Window	Wooden frame window	VELFAC Classic woodÂ–Top-guided window	glass	0.723736
	18	Space	Wall	Finish 1	Plaster	13 mm thick lightweight plaster	plaster	1.4054
	18	Space	Wall	Intermediate finish 1	Timber	6.5 mm thick 35 mm wide timber laths	timber	0.22545
	18	Space	Wall	Non-Load Bearing Structure	Brick	220 mm thick brick	brick	69.3693
	18	Space	Wall	Intermediate support	Timber	140 mm thick studding at 600mm c/c spacing	timber studwork	1.77838
	18	Space	Wall	Intermediate finish 2	Timber	6.5 mm thick 35 mm wide timber laths	timber	0.22545
	18	Space	Wall	Finish 2	Plaster	13 mm thick dense plaster	plaster	3.04504
	18	Space	Floor	Finish 1	Floor finish	10 mm thick carpet/underlay	carpet/underlay	0.231
	18	Space	Floor	Intermediate finish 1	Screed	75 mm thick screed	screed	10.395
	18	Space	Floor	Finish 2	Plaster	13 mm thick dense plaster	plaster	1.95195
	18	Space	Opening	Door	Wooden Door	Forza FD60 Flush Solid Core Timber Door	timber	1.13994
	18	Services	Heating	Heat Source	Gas Boiler	24kW TZERRA Ace-Matic (BE)	steel	0.01267
	18	Services	Heating	Heat Source	Gas Boiler	24kW TZERRA Ace-Matic (BE)	stainless steel	0.01267
	18	Services	Heating	Heat Source	Gas Boiler	24kW TZERRA Ace-Matic (BE)	aluminium	0.00635
	18	Services	Heating	Heat Source	Gas Boiler	24kW TZERRA Ace-Matic (BE)	brass	0.00162
	18	Services	Heating	Heat Source	Gas Boiler	24kW TZERRA Ace-Matic (BE)	plastic	0.00694
	18	Services	Heating	Emitter	Hot Water Radiator	1kW Fassane Pack double Ã ailettes	steel	0.707211
	18	Services	Heating	Emitter	Hot Water Radiator	1kW Fassane Pack double Ã ailettes	brass	0.0022638
	18	Services	Heating	Emitter	Hot Water Radiator	1kW Fassane Pack double Ã ailettes	plastic	0.00543312
	18	Services	Heating	Storage	Storage tank	300L Atlantic Mileo + 300	stainless steel	0.01382
	18	Services	Heating	Storage	Storage tank	300L Atlantic Mileo + 300	plastic	0.01244
	18	Services	Heating	Transportation	Heating pipe	15mm Plastic Pipe 1.5mm thickness	plastic	0.00647955
	18	Services	Electrical	Wiring	Electrical cable	1.5mm2 twin and earth cable	copper	0.00557172
	18	Services	Electrical	Wiring	Electrical cable	1.5mm2 twin and earth cable	plastic	0.00399168
	18	Services	Plumbing	Transportation	Plumbing pipe	40mm Plastic Waste Pipe 1.9 mm thickness	plastic	0.0251143
	18	Structure	Wall	Load bearing	Stone	600mm thick limestone	limestone	475.675
	18	Structure	Floor	Load bearing	Timber	150 mm thick timber joists at 600mm c/c spacing	timber	2.44283
	18	Structure	Roof	Load bearing	Insitu Concrete	65 mm thick cast concrete	concrete	15.015
	18	Skin	Roof	Finish 1	Timber	19 mm thick timber or chipboard	chipboard	1.3167
	19	Skin	Wall	Internal finish	Plaster	13 mm thick lightweight plaster	plaster	2.81081
	19	Skin	Floor	Finish 1	Floor finish	10 mm thick carpet/underlay	carpet/underlay	0.231
	19	Skin	Floor	Intermediate finish 1	Screed	75 mm thick screed	screed	10.395
	19	Skin	Opening	Door	Wooden door	Rationel AURA / Rationel FORMA	timber	0.212035
	19	Skin	Opening	Door	Wooden door	Rationel AURA / Rationel FORMA	glass	0.318826
	19	Skin	Opening	Window	Wooden frame window	Side hung window 3-glass Alu - AFSC	timber	0.305956
	19	Skin	Opening	Window	Wooden frame window	Side hung window 3-glass Alu - AFSC	glass	0.73423
	19	Space	Wall	Finish 1	Plaster	13 mm thick lightweight plaster	plaster	1.4054
	19	Space	Wall	Intermediate finish 1	Timber	6.5 mm thick 35 mm wide timber laths	timber	0.22545
	19	Space	Wall	Non-Load Bearing Structure	Brick	105 mm thick brick	brick	33.1081
	19	Space	Wall	Intermediate support	Timber	140 mm thick studding at 600mm c/c spacing	timber studwork	1.77838
	19	Space	Wall	Intermediate finish 2	Timber	6.5 mm thick 35 mm wide timber laths	timber	0.22545
	19	Space	Wall	Finish 2	Plaster	13 mm thick dense plaster	plaster	3.04504
	19	Space	Floor	Finish 1	Floor finish	10 mm thick carpet/underlay	carpet/underlay	0.231
	19	Space	Floor	Intermediate finish 1	Timber	19 mm thick timber or chipboard	chipboard	1.3167
	19	Space	Floor	Finish 2	Plaster	13 mm thick lightweight plaster	plaster	0.9009
	19	Space	Opening	Door	Wooden Door	Forza FD60 Flush Solid Core Timber Door	timber	1.13994
	19	Services	Heating	Heat Source	Gas Boiler	24kW Mixed Wall mounted gas condensing boiler - MPX2 System (BE)	steel	0.01738
	19	Services	Heating	Heat Source	Gas Boiler	24kW Mixed Wall mounted gas condensing boiler - MPX2 System (BE)	aluminium	0.00193
	19	Services	Heating	Heat Source	Gas Boiler	24kW Mixed Wall mounted gas condensing boiler - MPX2 System (BE)	copper	0.00111
	19	Services	Heating	Heat Source	Gas Boiler	24kW Mixed Wall mounted gas condensing boiler - MPX2 System (BE)	brass	0.00113
	19	Services	Heating	Heat Source	Gas Boiler	24kW Mixed Wall mounted gas condensing boiler - MPX2 System (BE)	plastic	0.00659
	19	Services	Heating	Emitter	Hot Water Radiator	1kW Thermopanel V4	steel	0.462721
	19	Services	Heating	Emitter	Hot Water Radiator	1kW Thermopanel V4	brass	0.00203742
	19	Services	Heating	Emitter	Hot Water Radiator	1kW Thermopanel V4	plastic	0.00249018
	19	Services	Heating	Storage	Storage tank	300L ACV SMART E	steel	0.01442
	19	Services	Heating	Storage	Storage tank	300L ACV SMART E	stainless steel	0.00752
	19	Services	Heating	Storage	Storage tank	300L ACV SMART E	plastic	0.007012
	19	Services	Heating	Transportation	Heating pipe	15mm Copper Pipe 0.7mm thickness	copper	0.0213444
	19	Services	Electrical	Wiring	Electrical cable	1.5mm2 twin and earth cable	copper	0.00557172
	19	Services	Electrical	Wiring	Electrical cable	1.5mm2 twin and earth cable	plastic	0.00399168
	19	Services	Plumbing	Transportation	Plumbing pipe	32mm Plastic Waste Pipe 1.8 mm thickness	plastic	0.0188773
	19	Structure	Wall	Load bearing	Stone	600 mm thick sandstone	sandstone	497.297
	19	Structure	Floor	Load bearing	Timber	100 mm thick timber joists at 600mm c/c spacing	timber	1.62855
	19	Structure	Roof	Load bearing	Timber	100 mm thick timber rafters at 600mm c/c spacing	timber	0.814275
	19	Skin	Roof	Finish 1	Timber	19 mm thick timber or chipboard	chipboard	1.3167
	20	Skin	Wall	Internal finish	Plaster	13 mm thick dense plaster	plaster	6.09008
	20	Skin	Floor	Finish 1	Floor finish	10 mm thick carpet/underlay	carpet/underlay	0.231
	20	Skin	Opening	Door	Wooden door	OPUS Wooden Front Doors	timber	0.447505
	20	Skin	Opening	Window	Composite frame window	SERIE STH ECO Â– WINDOW SYSTEM	timber	0.178721
	20	Skin	Opening	Window	Composite frame window	SERIE STH ECO Â– WINDOW SYSTEM	glass	0.762104
	20	Space	Wall	Finish 1	Plaster	13 mm thick dense plaster	plaster	3.04504
	20	Space	Wall	Intermediate finish 1	Timber	6.5 mm thick 35 mm wide timber laths	timber	0.22545
	20	Space	Wall	Non-Load Bearing Structure	Brick	215 mm thick brick	brick	67.7927
	20	Space	Wall	Intermediate support	Timber	25 mm thick timber battens at 600mm c/c spacing	timber studwork	0.317567
	20	Space	Wall	Intermediate finish 2	Timber	6.5 mm thick 35 mm wide timber laths	timber	0.22545
	20	Space	Wall	Finish 2	Plaster	13 mm thick lightweight plaster	plaster	1.4054
	20	Space	Floor	Finish 1	Floor finish	10 mm thick carpet/underlay	carpet/underlay	0.231
	20	Space	Floor	Intermediate finish 1	Timber	19 mm thick timber or chipboard	chipboard	1.3167
	20	Space	Floor	Finish 2	Plaster	13 mm thick dense plaster	plaster	1.95195
	20	Space	Opening	Door	Wooden Door	Forza FD60 Flush Solid Core Timber Door	timber	1.13994
	20	Services	Heating	Heat Source	Gas Boiler	20 kW TZERRA Ace-Matic (NL)	steel	0.00821
	20	Services	Heating	Heat Source	Gas Boiler	20 kW TZERRA Ace-Matic (NL)	stainless steel	0.00627
	20	Services	Heating	Heat Source	Gas Boiler	20 kW TZERRA Ace-Matic (NL)	aluminium	0.00189
	20	Services	Heating	Heat Source	Gas Boiler	20 kW TZERRA Ace-Matic (NL)	copper	0.00101
	20	Services	Heating	Heat Source	Gas Boiler	20 kW TZERRA Ace-Matic (NL)	plastic	0.00674
	20	Services	Heating	Emitter	Hot Water Radiator	1kW Galant Hot Water Radiator Range	steel	0.678234
	20	Services	Heating	Storage	Storage tank	300L Atlantic Mileo + 300	stainless steel	0.01382
	20	Services	Heating	Storage	Storage tank	300L Atlantic Mileo + 300	plastic	0.01244
	20	Services	Heating	Transportation	Heating pipe	15mm Copper Pipe 0.7mm thickness	copper	0.0213444
	20	Services	Electrical	Wiring	Electrical cable	2.5mm2 twin and earth cable	copper	0.00823284
	20	Services	Electrical	Wiring	Electrical cable	2.5mm2 twin and earth cable	plastic	0.00590436
	20	Services	Plumbing	Transportation	Plumbing pipe	40mm Plastic Waste Pipe 1.9 mm thickness	plastic	0.0251143
	20	Skin	Floor	Intermediate finish 1	Timber	19 mm thick timber or chipboard	chipboard	1.3167
	20	Structure	Wall	Load bearing	Brick	105 mm thick brick	brick	66.2161
	20	Structure	Floor	Load bearing	Timber	125 mm thick timber joists at 600mm c/c spacing	timber	2.035
	20	Structure	Roof	Load bearing	Timber	150 mm thick timber rafters at 600mm c/c spacing	timber	1.22141
	20	Skin	Roof	Finish 1	Timber	19 mm thick timber or chipboard	chipboard	1.3167
	21	Skin	Wall	Internal finish	Plaster	13 mm thick dense plaster	plaster	6.09008
	21	Skin	Floor	Finish 1	Floor finish	10 mm thick carpet/underlay	carpet/underlay	0.231
	21	Skin	Floor	Intermediate finish 1	Screed	50 mm thick screed	screed	6.93
	21	Skin	Opening	Door	Wooden door	OPUS Wooden Front Doors with glass	timber	0.363825
	21	Skin	Opening	Door	Wooden door	OPUS Wooden Front Doors with glass	glass	0.0606375
	21	Skin	Opening	Window	Composite frame window	Viking SW17 Aluclad Window Viking SW17 Wooden Window	timber	0.27054
	21	Skin	Opening	Window	Composite frame window	Viking SW17 Aluclad Window Viking SW17 Wooden Window	glass	0.757185
	21	Space	Wall	Finish 1	Plaster	13 mm thick dense plaster	plaster	3.04504
	21	Space	Wall	Intermediate finish 1	Timber	6.5 mm thick 35 mm wide timber laths	timber	0.22545
	21	Space	Wall	Non-Load Bearing Structure	Brick	220 mm thick brick	brick	69.3693
	21	Space	Wall	Intermediate support	Timber	95 mm thick studding at 600mm c/c spacing	timber studwork	1.20676
	21	Space	Wall	Intermediate finish 2	Timber	6.5 mm thick 35 mm wide timber laths	timber	0.22545
	21	Space	Wall	Finish 2	Plaster	13 mm thick lightweight plaster	plaster	1.4054
	21	Space	Floor	Finish 1	Floor finish	10 mm thick carpet/underlay	carpet/underlay	0.231
	21	Space	Floor	Intermediate finish 1	Screed	75 mm thick screed	screed	10.395
	21	Space	Floor	Finish 2	Plaster	13 mm thick dense plaster	plaster	1.95195
	21	Space	Opening	Door	Wooden Door	Forza FD60 Flush Solid Core Timber Door	timber	1.13994
	21	Services	Heating	Heat Source	Gas Boiler	24kW Mixed Wall mounted gas condensing boiler - MCR-S	steel	0.01081
	21	Services	Heating	Heat Source	Gas Boiler	24kW Mixed Wall mounted gas condensing boiler - MCR-S	stainless steel	0.0076
	21	Services	Heating	Heat Source	Gas Boiler	24kW Mixed Wall mounted gas condensing boiler - MCR-S	aluminium	0.00168
	21	Services	Heating	Heat Source	Gas Boiler	24kW Mixed Wall mounted gas condensing boiler - MCR-S	plastic	0.00667
	21	Services	Heating	Emitter	Hot Water Radiator	1kW Galant Hot Water Radiator Range	steel	0.678234
	21	Services	Heating	Storage	Storage tank	300L ACV SMART E	steel	0.01442
	21	Services	Heating	Storage	Storage tank	300L ACV SMART E	stainless steel	0.00752
	21	Services	Heating	Storage	Storage tank	300L ACV SMART E	plastic	0.007012
	21	Services	Heating	Transportation	Heating pipe	15mm Copper Pipe 0.7mm thickness	copper	0.0213444
	21	Services	Electrical	Wiring	Electrical cable	1.5mm2 twin and earth cable	copper	0.00557172
	21	Services	Electrical	Wiring	Electrical cable	1.5mm2 twin and earth cable	plastic	0.00399168
	21	Services	Plumbing	Transportation	Plumbing pipe	110mm Plastic Soil Pipe 4.2 mm thickness	plastic	0.154428
	21	Structure	Wall	Load bearing	Brick	215 mm thick brick	brick	135.585
	21	Structure	Floor	Load bearing	Timber	100 mm thick timber joists at 600mm c/c spacing	timber	1.62855
	21	Structure	Roof	Load bearing	Timber	100 mm thick timber rafters at 600mm c/c spacing	timber	0.814275
	21	Skin	Roof	Finish 1	Timber	19 mm thick timber or chipboard	chipboard	1.3167
	22	Skin	Wall	Internal finish	Plaster	13 mm thick lightweight plaster	plaster	2.81081
	22	Skin	Floor	Finish 1	Floor finish	10 mm thick carpet/underlay	carpet/underlay	0.231
	22	Skin	Opening	Door	Wooden door	Rationel AURA / Rationel FORMA	timber	0.212035
	22	Skin	Opening	Door	Wooden door	Rationel AURA / Rationel FORMA	glass	0.318826
	22	Skin	Opening	Window	Wooden frame window	Side hung window 3-glass Alu - AFSC	timber	0.305956
	22	Skin	Opening	Window	Wooden frame window	Side hung window 3-glass Alu - AFSC	glass	0.73423
	22	Space	Wall	Finish 1	Plaster	13 mm thick lightweight plaster	plaster	1.4054
	22	Space	Wall	Intermediate finish 1	Timber	6.5 mm thick 35 mm wide timber laths	timber	0.22545
	22	Space	Wall	Non-Load Bearing Structure	Brick	215 mm thick brick	brick	67.7927
	22	Space	Wall	Intermediate support	Timber	25 mm thick timber battens at 600mm c/c spacing	timber studwork	0.317567
	22	Space	Wall	Intermediate finish 2	Timber	6.5 mm thick 35 mm wide timber laths	timber	0.22545
	22	Space	Wall	Finish 2	Plaster	13 mm thick dense plaster	plaster	3.04504
	22	Space	Floor	Finish 1	Floor finish	10 mm thick carpet/underlay	carpet/underlay	0.231
	22	Space	Floor	Intermediate finish 1	Screed	75 mm thick screed	screed	10.395
	22	Space	Floor	Finish 2	Plaster	13 mm thick lightweight plaster	plaster	0.9009
	22	Space	Opening	Door	Wooden Door	Forza FD60 Flush Solid Core Timber Door	timber	1.13994
	22	Services	Heating	Heat Source	Gas Boiler	25kW ThermaFast Condens 31	steel	0.0167
	22	Services	Heating	Heat Source	Gas Boiler	25kW ThermaFast Condens 31	aluminium	0.00249
	22	Services	Heating	Heat Source	Gas Boiler	25kW ThermaFast Condens 31	copper	0.00365
	22	Services	Heating	Heat Source	Gas Boiler	25kW ThermaFast Condens 31	brass	0.00288
	22	Services	Heating	Heat Source	Gas Boiler	25kW ThermaFast Condens 31	plastic	0.00237
	22	Services	Heating	Emitter	Hot Water Radiator	1kW Thermopanel V4	steel	0.462721
	22	Services	Heating	Emitter	Hot Water Radiator	1kW Thermopanel V4	brass	0.00203742
	22	Services	Heating	Emitter	Hot Water Radiator	1kW Thermopanel V4	plastic	0.00249018
	22	Services	Heating	Storage	Storage tank	606L HRI 600	steel	0.04476
	22	Services	Heating	Storage	Storage tank	606L HRI 600	stainless steel	0.03076
	22	Services	Heating	Storage	Storage tank	606L HRI 600	plastic	0.002796
	22	Services	Heating	Transportation	Heating pipe	15mm Plastic Pipe 1.5mm thickness	plastic	0.00647955
	22	Services	Electrical	Wiring	Electrical cable	1.5mm2 twin and earth cable	copper	0.00557172
	22	Services	Electrical	Wiring	Electrical cable	1.5mm2 twin and earth cable	plastic	0.00399168
	22	Services	Plumbing	Transportation	Plumbing pipe	32mm Plastic Waste Pipe 1.8 mm thickness	plastic	0.0188773
	22	Skin	Floor	Intermediate finish 1	Timber	19 mm thick timber or chipboard	chipboard	1.3167
	22	Structure	Wall	Load bearing	Brick	220 mm thick brick	brick	138.739
	22	Structure	Floor	Load bearing	Timber	100 mm thick timber joists at 600mm c/c spacing	timber	1.62855
	22	Structure	Roof	Load bearing	Insitu Concrete	150 mm thick cast concrete	concrete	34.65
	22	Skin	Roof	Finish 1	Timber	19 mm thick timber or chipboard	chipboard	1.3167
	23	Skin	Wall	Internal finish	Plaster	13 mm thick lightweight plaster	plaster	2.81081
	23	Skin	Floor	Finish 1	Floor finish	10 mm thick carpet/underlay	carpet/underlay	0.231
	23	Skin	Floor	Intermediate finish 1	Screed	50 mm thick screed	screed	6.93
	23	Skin	Opening	Door	Wooden door	OPUS Wooden Front Doors with glass	timber	0.363825
	23	Skin	Opening	Door	Wooden door	OPUS Wooden Front Doors with glass	glass	0.0606375
	23	Skin	Opening	Window	Metal frame window	Glass fiber fixed window OK	glass	0.580432
	23	Space	Wall	Finish 1	Plaster	13 mm thick lightweight plaster	plaster	1.4054
	23	Space	Wall	Intermediate finish 1	Timber	6.5 mm thick 35 mm wide timber laths	timber	0.22545
	23	Space	Wall	Non-Load Bearing Structure	Brick	215 mm thick brick	brick	67.7927
	23	Space	Wall	Intermediate support	Timber	25 mm thick timber battens at 600mm c/c spacing	timber studwork	0.317567
	23	Space	Wall	Intermediate finish 2	Timber	6.5 mm thick 35 mm wide timber laths	timber	0.22545
	23	Space	Wall	Finish 2	Plaster	13 mm thick dense plaster	plaster	3.04504
	23	Space	Floor	Finish 1	Floor finish	10 mm thick carpet/underlay	carpet/underlay	0.231
	23	Space	Floor	Intermediate finish 1	Timber	19 mm thick timber or chipboard	chipboard	1.3167
	23	Space	Floor	Finish 2	Plaster	13 mm thick lightweight plaster	plaster	0.9009
	23	Space	Opening	Door	Wooden Door	Forza FD60 Flush Solid Core Timber Door	timber	1.13994
	23	Services	Heating	Heat Source	Gas Boiler	16kW Mixed Wall mounted gas condensing boiler - Accea	steel	0.01191
	23	Services	Heating	Heat Source	Gas Boiler	16kW Mixed Wall mounted gas condensing boiler - Accea	stainless steel	0.00835
	23	Services	Heating	Heat Source	Gas Boiler	16kW Mixed Wall mounted gas condensing boiler - Accea	aluminium	0.00186
	23	Services	Heating	Heat Source	Gas Boiler	16kW Mixed Wall mounted gas condensing boiler - Accea	copper	0.00104
	23	Services	Heating	Heat Source	Gas Boiler	16kW Mixed Wall mounted gas condensing boiler - Accea	plastic	0.00692
	23	Services	Heating	Emitter	Hot Water Radiator	1kW Classic Hot Water Radiator Range	steel	0.456382
	23	Services	Heating	Storage	Storage tank	300L ACV SMART E	steel	0.01442
	23	Services	Heating	Storage	Storage tank	300L ACV SMART E	stainless steel	0.00752
	23	Services	Heating	Storage	Storage tank	300L ACV SMART E	plastic	0.007012
	23	Services	Heating	Transportation	Heating pipe	22mm Plastic Pipe 2mm thickness	plastic	0.00670824
	23	Services	Electrical	Wiring	Electrical cable	2.5mm2 twin and earth cable	copper	0.00823284
	23	Services	Electrical	Wiring	Electrical cable	2.5mm2 twin and earth cable	plastic	0.00590436
	23	Services	Plumbing	Transportation	Plumbing pipe	110mm Plastic Soil Pipe 4.2 mm thickness	plastic	0.154428
	23	Structure	Wall	Load bearing	Stone	600mm thick slate	slate	605.405
	23	Structure	Floor	Load bearing	Insitu Concrete	150 mm thick cast concrete	concrete	69.3
	23	Structure	Roof	Load bearing	Insitu Concrete	65 mm thick cast concrete	concrete	15.015
	23	Skin	Roof	Finish 1	Timber	19 mm thick timber or chipboard	chipboard	1.3167
	24	Skin	Wall	Internal finish	Plaster	13 mm thick dense plaster	plaster	6.09008
	24	Skin	Floor	Finish 1	Floor finish	10 mm thick carpet/underlay	carpet/underlay	0.231
	24	Skin	Floor	Intermediate finish 1	Screed	75 mm thick screed	screed	10.395
	24	Skin	Opening	Door	Steel door	Steel doors S30/Y30 - S63/Y63	timber	0.00545738
	24	Skin	Opening	Window	Wooden frame window	Side hung window 3-glass Alu - AFSC	timber	0.305956
	24	Skin	Opening	Window	Wooden frame window	Side hung window 3-glass Alu - AFSC	glass	0.73423
	24	Space	Wall	Finish 1	Plaster	13 mm thick lightweight plaster	plaster	1.4054
	24	Space	Wall	Intermediate finish 1	Timber	6.5 mm thick 35 mm wide timber laths	timber	0.22545
	24	Space	Wall	Non-Load Bearing Structure	Brick	220 mm thick brick	brick	69.3693
	24	Space	Wall	Intermediate support	Timber	25 mm thick timber battens at 600mm c/c spacing	timber studwork	0.317567
	24	Space	Wall	Intermediate finish 2	Timber	6.5 mm thick 35 mm wide timber laths	timber	0.22545
	24	Space	Wall	Finish 2	Plaster	13 mm thick dense plaster	plaster	3.04504
	24	Space	Floor	Finish 1	Floor finish	10 mm thick carpet/underlay	carpet/underlay	0.231
	24	Space	Floor	Intermediate finish 1	Screed	75 mm thick screed	screed	10.395
	24	Space	Floor	Finish 2	Plaster	13 mm thick dense plaster	plaster	1.95195
	24	Space	Opening	Door	Wooden Door	Forza FD60 Flush Solid Core Timber Door	timber	1.13994
	24	Services	Heating	Heat Source	Gas Boiler	20 kW TZERRA Ace-Matic (NL)	steel	0.00821
	24	Services	Heating	Heat Source	Gas Boiler	20 kW TZERRA Ace-Matic (NL)	stainless steel	0.00627
	24	Services	Heating	Heat Source	Gas Boiler	20 kW TZERRA Ace-Matic (NL)	aluminium	0.00189
	24	Services	Heating	Heat Source	Gas Boiler	20 kW TZERRA Ace-Matic (NL)	copper	0.00101
	24	Services	Heating	Heat Source	Gas Boiler	20 kW TZERRA Ace-Matic (NL)	plastic	0.00674
	24	Services	Heating	Emitter	Hot Water Radiator	1kW Fassane Pack double Ã ailettes	steel	0.707211
	24	Services	Heating	Emitter	Hot Water Radiator	1kW Fassane Pack double Ã ailettes	brass	0.0022638
	24	Services	Heating	Emitter	Hot Water Radiator	1kW Fassane Pack double Ã ailettes	plastic	0.00543312
	24	Services	Heating	Storage	Storage tank	606L HRI 600	steel	0.04476
	24	Services	Heating	Storage	Storage tank	606L HRI 600	stainless steel	0.03076
	24	Services	Heating	Storage	Storage tank	606L HRI 600	plastic	0.002796
	24	Services	Heating	Transportation	Heating pipe	22mm Plastic Pipe 2mm thickness	plastic	0.00670824
	24	Services	Electrical	Wiring	Electrical cable	1.5mm2 twin and earth cable	copper	0.00557172
	24	Services	Electrical	Wiring	Electrical cable	1.5mm2 twin and earth cable	plastic	0.00399168
	24	Services	Plumbing	Transportation	Plumbing pipe	40mm Plastic Waste Pipe 1.9 mm thickness	plastic	0.0251143
	24	Structure	Wall	Load bearing	Brick	215 mm thick brick	brick	135.585
	24	Structure	Floor	Load bearing	Timber	125 mm thick timber joists at 600mm c/c spacing	timber	2.035
	24	Structure	Roof	Load bearing	Insitu Concrete	80 mm thick concrete	concrete	18.48
	24	Skin	Roof	Finish 1	Timber	19 mm thick timber or chipboard	chipboard	1.3167
	25	Skin	Wall	Internal finish	Plaster	13 mm thick dense plaster	plaster	6.09008
	25	Skin	Floor	Finish 1	Floor finish	10 mm thick carpet/underlay	carpet/underlay	0.231
	25	Skin	Opening	Door	Wooden door	OPUS Wooden Front Doors with glass	timber	0.363825
	25	Skin	Opening	Door	Wooden door	OPUS Wooden Front Doors with glass	glass	0.0606375
	25	Skin	Opening	Window	Wooden frame window	Side hung window 3-glass Alu - AFSC	timber	0.305956
	25	Skin	Opening	Window	Wooden frame window	Side hung window 3-glass Alu - AFSC	glass	0.73423
	25	Space	Wall	Finish 1	Plaster	13 mm thick dense plaster	plaster	3.04504
	25	Space	Wall	Intermediate finish 1	Timber	6.5 mm thick 35 mm wide timber laths	timber	0.22545
	25	Space	Wall	Non-Load Bearing Structure	Brick	215 mm thick brick	brick	67.7927
	25	Space	Wall	Intermediate support	Timber	140 mm thick studding at 600mm c/c spacing	timber studwork	1.77838
	25	Space	Wall	Intermediate finish 2	Timber	6.5 mm thick 35 mm wide timber laths	timber	0.22545
	25	Space	Wall	Finish 2	Plaster	13 mm thick lightweight plaster	plaster	1.4054
	25	Space	Floor	Finish 1	Floor finish	10 mm thick carpet/underlay	carpet/underlay	0.231
	25	Space	Floor	Intermediate finish 1	Timber	19 mm thick timber or chipboard	chipboard	1.3167
	25	Space	Floor	Finish 2	Plaster	13 mm thick lightweight plaster	plaster	0.9009
	25	Space	Opening	Door	Wooden Door	Forza FD60 Flush Solid Core Timber Door	timber	1.13994
	25	Services	Heating	Heat Source	Gas Boiler	20kW Mixed Wall mounted gas condensing boiler - MPX2 MI (FR)	steel	0.0181
	25	Services	Heating	Heat Source	Gas Boiler	20kW Mixed Wall mounted gas condensing boiler - MPX2 MI (FR)	aluminium	0.00193
	25	Services	Heating	Heat Source	Gas Boiler	20kW Mixed Wall mounted gas condensing boiler - MPX2 MI (FR)	brass	0.00135
	25	Services	Heating	Heat Source	Gas Boiler	20kW Mixed Wall mounted gas condensing boiler - MPX2 MI (FR)	plastic	0.00652
	25	Services	Heating	Emitter	Hot Water Radiator	1kW Therma Hot Water Radiator Range	steel	0.567308
	25	Services	Heating	Storage	Storage tank	300L ACV SMART E	steel	0.01442
	25	Services	Heating	Storage	Storage tank	300L ACV SMART E	stainless steel	0.00752
	25	Services	Heating	Storage	Storage tank	300L ACV SMART E	plastic	0.007012
	25	Services	Heating	Transportation	Heating pipe	15mm Copper Pipe 0.7mm thickness	copper	0.0213444
	25	Services	Electrical	Wiring	Electrical cable	2.5mm2 twin and earth cable	copper	0.00823284
	25	Services	Electrical	Wiring	Electrical cable	2.5mm2 twin and earth cable	plastic	0.00590436
	25	Services	Plumbing	Transportation	Plumbing pipe	160mm Plastic Soil Pipe 6.2 mm thickness	plastic	0.331309
	25	Skin	Floor	Intermediate finish 1	Timber	19 mm thick timber or chipboard	chipboard	1.3167
	25	Structure	Wall	Load bearing	Stone	600mm thick granite	granite	562.162
	25	Structure	Floor	Load bearing	Timber	150 mm thick timber joists at 600mm c/c spacing	timber	2.44283
	25	Structure	Roof	Load bearing	Insitu Concrete	150 mm thick cast concrete	concrete	34.65
	25	Skin	Roof	Finish 1	Timber	19 mm thick timber or chipboard	chipboard	1.3167
	26	Skin	Wall	Internal finish	Plaster	13 mm thick dense plaster	plaster	6.09008
	26	Skin	Floor	Finish 1	Floor finish	10 mm thick carpet/underlay	carpet/underlay	0.231
	26	Skin	Floor	Intermediate finish 1	Screed	50 mm thick screed	screed	6.93
	26	Skin	Opening	Door	Wooden door	Rationel AURA / Rationel FORMA	timber	0.212035
	26	Skin	Opening	Door	Wooden door	Rationel AURA / Rationel FORMA	glass	0.318826
	26	Skin	Opening	Window	Composite frame window	Side-hung window 2+1 Kipp/Dreh - IKL-AL	timber	0.126908
	26	Skin	Opening	Window	Composite frame window	Side-hung window 2+1 Kipp/Dreh - IKL-AL	glass	0.736197
	26	Space	Wall	Finish 1	Plaster	13 mm thick dense plaster	plaster	3.04504
	26	Space	Wall	Intermediate finish 1	Timber	6.5 mm thick 35 mm wide timber laths	timber	0.22545
	26	Space	Wall	Non-Load Bearing Structure	Brick	215 mm thick brick	brick	67.7927
	26	Space	Wall	Intermediate support	Timber	95 mm thick studding at 600mm c/c spacing	timber studwork	1.20676
	26	Space	Wall	Intermediate finish 2	Timber	6.5 mm thick 35 mm wide timber laths	timber	0.22545
	26	Space	Wall	Finish 2	Plaster	13 mm thick lightweight plaster	plaster	1.4054
	26	Space	Floor	Finish 1	Floor finish	10 mm thick carpet/underlay	carpet/underlay	0.231
	26	Space	Floor	Intermediate finish 1	Screed	75 mm thick screed	screed	10.395
	26	Space	Floor	Finish 2	Plaster	13 mm thick lightweight plaster	plaster	0.9009
	26	Space	Opening	Door	Wooden Door	Forza FD60 Flush Solid Core Timber Door	timber	1.13994
	26	Services	Heating	Heat Source	Gas Boiler	24kW TZERRA Ace-Matic (BE)	steel	0.01267
	26	Services	Heating	Heat Source	Gas Boiler	24kW TZERRA Ace-Matic (BE)	stainless steel	0.01267
	26	Services	Heating	Heat Source	Gas Boiler	24kW TZERRA Ace-Matic (BE)	aluminium	0.00635
	26	Services	Heating	Heat Source	Gas Boiler	24kW TZERRA Ace-Matic (BE)	brass	0.00162
	26	Services	Heating	Heat Source	Gas Boiler	24kW TZERRA Ace-Matic (BE)	plastic	0.00694
	26	Services	Heating	Emitter	Hot Water Radiator	1kW Classic Hot Water Radiator Range	steel	0.456382
	26	Services	Heating	Storage	Storage tank	300L Atlantic Mileo + 300	stainless steel	0.01382
	26	Services	Heating	Storage	Storage tank	300L Atlantic Mileo + 300	plastic	0.01244
	26	Services	Heating	Transportation	Heating pipe	15mm Copper Pipe 0.7mm thickness	copper	0.0213444
	26	Services	Electrical	Wiring	Electrical cable	2.5mm2 twin and earth cable	copper	0.00823284
	26	Services	Electrical	Wiring	Electrical cable	2.5mm2 twin and earth cable	plastic	0.00590436
	26	Services	Plumbing	Transportation	Plumbing pipe	110mm Plastic Soil Pipe 4.2 mm thickness	plastic	0.154428
	26	Structure	Wall	Load bearing	Stone	600mm thick slate	slate	605.405
	26	Structure	Floor	Load bearing	Timber	225 mm thick timber joists at 600mm c/c spacing	timber	3.66424
	26	Structure	Roof	Load bearing	Timber	35 mm thick fink truss at 600mm c/c spacing	timber	1.32132
	26	Skin	Roof	Finish 1	Timber	19 mm thick timber or chipboard	chipboard	1.3167
	27	Skin	Wall	Internal finish	Plaster	13 mm thick dense plaster	plaster	6.09008
	27	Skin	Floor	Finish 1	Floor finish	10 mm thick carpet/underlay	carpet/underlay	0.231
	27	Skin	Floor	Intermediate finish 1	Screed	75 mm thick screed	screed	10.395
	27	Skin	Opening	Door	Steel door	Steel doors S30/Y30 - S63/Y63	timber	0.00545738
	27	Skin	Opening	Window	Metal frame window	Glass fiber fixed window OK	glass	0.580432
	27	Space	Wall	Finish 1	Plaster	13 mm thick lightweight plaster	plaster	1.4054
	27	Space	Wall	Intermediate finish 1	Timber	6.5 mm thick 35 mm wide timber laths	timber	0.22545
	27	Space	Wall	Non-Load Bearing Structure	Brick	215 mm thick brick	brick	67.7927
	27	Space	Wall	Intermediate support	Timber	95 mm thick studding at 600mm c/c spacing	timber studwork	1.20676
	27	Space	Wall	Intermediate finish 2	Timber	6.5 mm thick 35 mm wide timber laths	timber	0.22545
	27	Space	Wall	Finish 2	Plaster	13 mm thick lightweight plaster	plaster	1.4054
	27	Space	Floor	Finish 1	Floor finish	10 mm thick carpet/underlay	carpet/underlay	0.231
	27	Space	Floor	Intermediate finish 1	Screed	75 mm thick screed	screed	10.395
	27	Space	Floor	Finish 2	Plaster	13 mm thick dense plaster	plaster	1.95195
	27	Space	Opening	Door	Wooden Door	Forza FD60 Flush Solid Core Timber Door	timber	1.13994
	27	Services	Heating	Heat Source	Gas Boiler	25kW ecoTEC plus systÃ¨me VU 25 CS/1-5 (N-FR)	steel	0.01545
	27	Services	Heating	Heat Source	Gas Boiler	25kW ecoTEC plus systÃ¨me VU 25 CS/1-5 (N-FR)	stainless steel	0.00941
	27	Services	Heating	Heat Source	Gas Boiler	25kW ecoTEC plus systÃ¨me VU 25 CS/1-5 (N-FR)	aluminium	0.00247
	27	Services	Heating	Heat Source	Gas Boiler	25kW ecoTEC plus systÃ¨me VU 25 CS/1-5 (N-FR)	copper	0.00234
	27	Services	Heating	Heat Source	Gas Boiler	25kW ecoTEC plus systÃ¨me VU 25 CS/1-5 (N-FR)	brass	0.00229
	27	Services	Heating	Heat Source	Gas Boiler	25kW ecoTEC plus systÃ¨me VU 25 CS/1-5 (N-FR)	plastic	0.00383
	27	Services	Heating	Emitter	Hot Water Radiator	1kW Fassane Pack double Ã ailettes	steel	0.707211
	27	Services	Heating	Emitter	Hot Water Radiator	1kW Fassane Pack double Ã ailettes	brass	0.0022638
	27	Services	Heating	Emitter	Hot Water Radiator	1kW Fassane Pack double Ã ailettes	plastic	0.00543312
	27	Services	Heating	Storage	Storage tank	300L Atlantic Mileo + 300	stainless steel	0.01382
	27	Services	Heating	Storage	Storage tank	300L Atlantic Mileo + 300	plastic	0.01244
	27	Services	Heating	Transportation	Heating pipe	22mm Plastic Pipe 2mm thickness	plastic	0.00670824
	27	Services	Electrical	Wiring	Electrical cable	1.5mm2 twin and earth cable	copper	0.00557172
	27	Services	Electrical	Wiring	Electrical cable	1.5mm2 twin and earth cable	plastic	0.00399168
	27	Services	Plumbing	Transportation	Plumbing pipe	32mm Plastic Waste Pipe 1.8 mm thickness	plastic	0.0188773
	27	Structure	Wall	Load bearing	Stone	600mm thick granite	granite	562.162
	27	Structure	Floor	Load bearing	Timber	200 mm thick timber joists at 600mm c/c spacing	timber	3.2571
	27	Structure	Roof	Load bearing	Timber	35 mm thick fink truss at 600mm c/c spacing	timber	1.32132
	27	Skin	Roof	Finish 1	Timber	19 mm thick timber or chipboard	chipboard	1.3167
	28	Skin	Wall	Internal finish	Plaster	13 mm thick dense plaster	plaster	6.09008
	28	Skin	Floor	Finish 1	Floor finish	10 mm thick carpet/underlay	carpet/underlay	0.231
	28	Skin	Opening	Door	Steel door	Steel doors S30/Y30 - S63/Y63	timber	0.00545738
	28	Skin	Opening	Window	Wooden frame window	VELFAC Classic woodÂ–Top-guided window	timber	0.343012
	28	Skin	Opening	Window	Wooden frame window	VELFAC Classic woodÂ–Top-guided window	glass	0.723736
	28	Space	Wall	Finish 1	Plaster	13 mm thick dense plaster	plaster	3.04504
	28	Space	Wall	Intermediate finish 1	Timber	6.5 mm thick 35 mm wide timber laths	timber	0.22545
	28	Space	Wall	Non-Load Bearing Structure	Brick	215 mm thick brick	brick	67.7927
	28	Space	Wall	Intermediate support	Timber	140 mm thick studding at 600mm c/c spacing	timber studwork	1.77838
	28	Space	Wall	Intermediate finish 2	Timber	6.5 mm thick 35 mm wide timber laths	timber	0.22545
	28	Space	Wall	Finish 2	Plaster	13 mm thick dense plaster	plaster	3.04504
	28	Space	Floor	Finish 1	Floor finish	10 mm thick carpet/underlay	carpet/underlay	0.231
	28	Space	Floor	Intermediate finish 1	Timber	19 mm thick timber or chipboard	chipboard	1.3167
	28	Space	Floor	Finish 2	Plaster	13 mm thick dense plaster	plaster	1.95195
	28	Space	Opening	Door	Wooden Door	Forza FD60 Flush Solid Core Timber Door	timber	1.13994
	28	Services	Heating	Heat Source	Gas Boiler	24kW TZERRA Ace-Matic (DE)	steel	0.01266
	28	Services	Heating	Heat Source	Gas Boiler	24kW TZERRA Ace-Matic (DE)	stainless steel	0.00644
	28	Services	Heating	Heat Source	Gas Boiler	24kW TZERRA Ace-Matic (DE)	aluminium	0.00191
	28	Services	Heating	Heat Source	Gas Boiler	24kW TZERRA Ace-Matic (DE)	copper	0.00101
	28	Services	Heating	Heat Source	Gas Boiler	24kW TZERRA Ace-Matic (DE)	plastic	0.00733
	28	Services	Heating	Emitter	Hot Water Radiator	1kW Classic Hot Water Radiator Range	steel	0.456382
	28	Services	Heating	Storage	Storage tank	300L ACV SMART E	steel	0.01442
	28	Services	Heating	Storage	Storage tank	300L ACV SMART E	stainless steel	0.00752
	28	Services	Heating	Storage	Storage tank	300L ACV SMART E	plastic	0.007012
	28	Services	Heating	Transportation	Heating pipe	22mm Copper Pipe 0.9mm thickness	copper	0.0404019
	28	Services	Electrical	Wiring	Electrical cable	1.5mm2 twin and earth cable	copper	0.00557172
	28	Services	Electrical	Wiring	Electrical cable	1.5mm2 twin and earth cable	plastic	0.00399168
	28	Services	Plumbing	Transportation	Plumbing pipe	40mm Plastic Waste Pipe 1.9 mm thickness	plastic	0.0251143
	28	Skin	Floor	Intermediate finish 1	Timber	19 mm thick timber or chipboard	chipboard	1.3167
	28	Structure	Wall	Load bearing	Stone	600mm thick slate	slate	605.405
	28	Structure	Floor	Load bearing	Timber	225 mm thick timber joists at 600mm c/c spacing	timber	3.66424
	28	Structure	Roof	Load bearing	Timber	35 mm thick fink truss at 600mm c/c spacing	timber	1.32132
	28	Skin	Roof	Finish 1	Timber	19 mm thick timber or chipboard	chipboard	1.3167
	29	Skin	Wall	Internal finish	Plaster	13 mm thick dense plaster	plaster	6.09008
	29	Skin	Floor	Finish 1	Floor finish	10 mm thick carpet/underlay	carpet/underlay	0.231
	29	Skin	Opening	Door	Steel door	Steel doors S30/Y30 - S63/Y63	timber	0.00545738
	29	Skin	Opening	Window	Metal frame window	forster unico Windows	glass	1.62547
	29	Space	Wall	Finish 1	Plaster	13 mm thick lightweight plaster	plaster	1.4054
	29	Space	Wall	Intermediate finish 1	Timber	6.5 mm thick 35 mm wide timber laths	timber	0.22545
	29	Space	Wall	Non-Load Bearing Structure	Brick	105 mm thick brick	brick	33.1081
	29	Space	Wall	Intermediate support	Timber	25 mm thick timber battens at 600mm c/c spacing	timber studwork	0.317567
	29	Space	Wall	Intermediate finish 2	Timber	6.5 mm thick 35 mm wide timber laths	timber	0.22545
	29	Space	Wall	Finish 2	Plaster	13 mm thick dense plaster	plaster	3.04504
	29	Space	Floor	Finish 1	Floor finish	10 mm thick carpet/underlay	carpet/underlay	0.231
	29	Space	Floor	Intermediate finish 1	Screed	50 mm thick screed	screed	6.93
	29	Space	Floor	Finish 2	Plaster	13 mm thick dense plaster	plaster	1.95195
	29	Space	Opening	Door	Wooden Door	Forza FD60 Flush Solid Core Timber Door	timber	1.13994
	29	Services	Heating	Heat Source	Gas Boiler	24kW TZERRA Ace-Matic (BE)	steel	0.01267
	29	Services	Heating	Heat Source	Gas Boiler	24kW TZERRA Ace-Matic (BE)	stainless steel	0.01267
	29	Services	Heating	Heat Source	Gas Boiler	24kW TZERRA Ace-Matic (BE)	aluminium	0.00635
	29	Services	Heating	Heat Source	Gas Boiler	24kW TZERRA Ace-Matic (BE)	brass	0.00162
	29	Services	Heating	Heat Source	Gas Boiler	24kW TZERRA Ace-Matic (BE)	plastic	0.00694
	29	Services	Heating	Emitter	Hot Water Radiator	1kW Thermopanel V4	steel	0.462721
	29	Services	Heating	Emitter	Hot Water Radiator	1kW Thermopanel V4	brass	0.00203742
	29	Services	Heating	Emitter	Hot Water Radiator	1kW Thermopanel V4	plastic	0.00249018
	29	Services	Heating	Storage	Storage tank	300L ACV SMART E	steel	0.01442
	29	Services	Heating	Storage	Storage tank	300L ACV SMART E	stainless steel	0.00752
	29	Services	Heating	Storage	Storage tank	300L ACV SMART E	plastic	0.007012
	29	Services	Heating	Transportation	Heating pipe	22mm Plastic Pipe 2mm thickness	plastic	0.00670824
	29	Services	Electrical	Wiring	Electrical cable	2.5mm2 twin and earth cable	copper	0.00823284
	29	Services	Electrical	Wiring	Electrical cable	2.5mm2 twin and earth cable	plastic	0.00590436
	29	Services	Plumbing	Transportation	Plumbing pipe	160mm Plastic Soil Pipe 6.2 mm thickness	plastic	0.331309
	29	Skin	Floor	Intermediate finish 1	Timber	19 mm thick timber or chipboard	chipboard	1.3167
	29	Structure	Wall	Load bearing	Brick	215 mm thick brick	brick	135.585
	29	Structure	Floor	Load bearing	Timber	125 mm thick timber joists at 600mm c/c spacing	timber	2.035
	29	Structure	Roof	Load bearing	Timber	150 mm thick timber rafters at 600mm c/c spacing	timber	1.22141
	29	Skin	Roof	Finish 1	Timber	19 mm thick timber or chipboard	chipboard	1.3167
	30	Skin	Wall	Internal finish	Plaster	13 mm thick lightweight plaster	plaster	2.81081
	30	Skin	Floor	Finish 1	Floor finish	10 mm thick carpet/underlay	carpet/underlay	0.231
	30	Skin	Floor	Intermediate finish 1	Screed	50 mm thick screed	screed	6.93
	30	Skin	Opening	Door	Steel door	Steel doors S30/Y30 - S63/Y63	timber	0.00545738
	30	Skin	Opening	Window	Wooden frame window	Side hung window 3-glass Alu - AFSC	timber	0.305956
	30	Skin	Opening	Window	Wooden frame window	Side hung window 3-glass Alu - AFSC	glass	0.73423
	30	Space	Wall	Finish 1	Plaster	13 mm thick dense plaster	plaster	3.04504
	30	Space	Wall	Intermediate finish 1	Timber	6.5 mm thick 35 mm wide timber laths	timber	0.22545
	30	Space	Wall	Non-Load Bearing Structure	Brick	105 mm thick brick	brick	33.1081
	30	Space	Wall	Intermediate support	Timber	95 mm thick studding at 600mm c/c spacing	timber studwork	1.20676
	30	Space	Wall	Intermediate finish 2	Timber	6.5 mm thick 35 mm wide timber laths	timber	0.22545
	30	Space	Wall	Finish 2	Plaster	13 mm thick lightweight plaster	plaster	1.4054
	30	Space	Floor	Finish 1	Floor finish	10 mm thick carpet/underlay	carpet/underlay	0.231
	30	Space	Floor	Intermediate finish 1	Timber	19 mm thick timber or chipboard	chipboard	1.3167
	30	Space	Floor	Finish 2	Plaster	13 mm thick dense plaster	plaster	1.95195
	30	Space	Opening	Door	Wooden Door	Forza FD60 Flush Solid Core Timber Door	timber	1.13994
	30	Services	Heating	Heat Source	Gas Boiler	25kW ecoTEC plus VUW 25/32CS/1-5 (N-FR)	steel	0.01556
	30	Services	Heating	Heat Source	Gas Boiler	25kW ecoTEC plus VUW 25/32CS/1-5 (N-FR)	stainless steel	0.0094
	30	Services	Heating	Heat Source	Gas Boiler	25kW ecoTEC plus VUW 25/32CS/1-5 (N-FR)	aluminium	0.00245
	30	Services	Heating	Heat Source	Gas Boiler	25kW ecoTEC plus VUW 25/32CS/1-5 (N-FR)	copper	0.00275
	30	Services	Heating	Heat Source	Gas Boiler	25kW ecoTEC plus VUW 25/32CS/1-5 (N-FR)	brass	0.00269
	30	Services	Heating	Heat Source	Gas Boiler	25kW ecoTEC plus VUW 25/32CS/1-5 (N-FR)	plastic	0.00355
	30	Services	Heating	Emitter	Hot Water Radiator	1kW Therma Hot Water Radiator Range	steel	0.567308
	30	Services	Heating	Storage	Storage tank	300L ACV SMART E	steel	0.01442
	30	Services	Heating	Storage	Storage tank	300L ACV SMART E	stainless steel	0.00752
	30	Services	Heating	Storage	Storage tank	300L ACV SMART E	plastic	0.007012
	30	Services	Heating	Transportation	Heating pipe	15mm Plastic Pipe 1.5mm thickness	plastic	0.00647955
	30	Services	Electrical	Wiring	Electrical cable	1.5mm2 twin and earth cable	copper	0.00557172
	30	Services	Electrical	Wiring	Electrical cable	1.5mm2 twin and earth cable	plastic	0.00399168
	30	Services	Plumbing	Transportation	Plumbing pipe	110mm Plastic Soil Pipe 4.2 mm thickness	plastic	0.154428
	30	Structure	Wall	Load bearing	Brick	215 mm thick brick	brick	135.585
	30	Structure	Floor	Load bearing	Insitu Concrete	65 mm thick cast concrete	concrete	30.03
	30	Structure	Roof	Load bearing	Timber	35 mm thick fink truss at 600mm c/c spacing	timber	1.32132
	30	Skin	Roof	Finish 1	Timber	19 mm thick timber or chipboard	chipboard	1.3167
	31	Skin	Wall	Internal finish	Plaster	13 mm thick lightweight plaster	plaster	2.81081
	31	Skin	Floor	Finish 1	Floor finish	10 mm thick carpet/underlay	carpet/underlay	0.231
	31	Skin	Floor	Intermediate finish 1	Screed	50 mm thick screed	screed	6.93
	31	Skin	Opening	Door	Wooden door	OPUS Wooden Front Doors	timber	0.447505
	31	Skin	Opening	Window	Wooden frame window	Side hung window 3-glass Alu - AFSC	timber	0.305956
	31	Skin	Opening	Window	Wooden frame window	Side hung window 3-glass Alu - AFSC	glass	0.73423
	31	Space	Wall	Finish 1	Plaster	13 mm thick dense plaster	plaster	3.04504
	31	Space	Wall	Intermediate finish 1	Timber	6.5 mm thick 35 mm wide timber laths	timber	0.22545
	31	Space	Wall	Non-Load Bearing Structure	Brick	220 mm thick brick	brick	69.3693
	31	Space	Wall	Intermediate support	Timber	25 mm thick timber battens at 600mm c/c spacing	timber studwork	0.317567
	31	Space	Wall	Intermediate finish 2	Timber	6.5 mm thick 35 mm wide timber laths	timber	0.22545
	31	Space	Wall	Finish 2	Plaster	13 mm thick lightweight plaster	plaster	1.4054
	31	Space	Floor	Finish 1	Floor finish	10 mm thick carpet/underlay	carpet/underlay	0.231
	31	Space	Floor	Intermediate finish 1	Timber	19 mm thick timber or chipboard	chipboard	1.3167
	31	Space	Floor	Finish 2	Plaster	13 mm thick dense plaster	plaster	1.95195
	31	Space	Opening	Door	Wooden Door	Forza FD60 Flush Solid Core Timber Door	timber	1.13994
	31	Services	Heating	Heat Source	Gas Boiler	24kW Mixed Wall mounted gas condensing boiler - MPX2 System (BE)	steel	0.01738
	31	Services	Heating	Heat Source	Gas Boiler	24kW Mixed Wall mounted gas condensing boiler - MPX2 System (BE)	aluminium	0.00193
	31	Services	Heating	Heat Source	Gas Boiler	24kW Mixed Wall mounted gas condensing boiler - MPX2 System (BE)	copper	0.00111
	31	Services	Heating	Heat Source	Gas Boiler	24kW Mixed Wall mounted gas condensing boiler - MPX2 System (BE)	brass	0.00113
	31	Services	Heating	Heat Source	Gas Boiler	24kW Mixed Wall mounted gas condensing boiler - MPX2 System (BE)	plastic	0.00659
	31	Services	Heating	Emitter	Hot Water Radiator	1kW Fassane Pack double Ã ailettes	steel	0.707211
	31	Services	Heating	Emitter	Hot Water Radiator	1kW Fassane Pack double Ã ailettes	brass	0.0022638
	31	Services	Heating	Emitter	Hot Water Radiator	1kW Fassane Pack double Ã ailettes	plastic	0.00543312
	31	Services	Heating	Storage	Storage tank	606L HRI 600	steel	0.04476
	31	Services	Heating	Storage	Storage tank	606L HRI 600	stainless steel	0.03076
	31	Services	Heating	Storage	Storage tank	606L HRI 600	plastic	0.002796
	31	Services	Heating	Transportation	Heating pipe	15mm Plastic Pipe 1.5mm thickness	plastic	0.00647955
	31	Services	Electrical	Wiring	Electrical cable	1.5mm2 twin and earth cable	copper	0.00557172
	31	Services	Electrical	Wiring	Electrical cable	1.5mm2 twin and earth cable	plastic	0.00399168
	31	Services	Plumbing	Transportation	Plumbing pipe	110mm Plastic Soil Pipe 4.2 mm thickness	plastic	0.154428
	31	Structure	Wall	Load bearing	Brick	220 mm thick brick	brick	138.739
	31	Structure	Floor	Load bearing	Timber	125 mm thick timber joists at 600mm c/c spacing	timber	2.035
	31	Structure	Roof	Load bearing	Timber	125 mm thick timber rafters at 600mm c/c spacing	timber	1.01784
	31	Skin	Roof	Finish 1	Timber	19 mm thick timber or chipboard	chipboard	1.3167
	32	Skin	Wall	Internal finish	Plaster	13 mm thick dense plaster	plaster	6.09008
	32	Skin	Floor	Finish 1	Floor finish	10 mm thick carpet/underlay	carpet/underlay	0.231
	32	Skin	Opening	Door	Steel door	Steel doors S30/Y30 - S63/Y63	timber	0.00545738
	32	Skin	Opening	Window	Composite frame window	SERIE STH ECO Â– WINDOW SYSTEM	timber	0.178721
	32	Skin	Opening	Window	Composite frame window	SERIE STH ECO Â– WINDOW SYSTEM	glass	0.762104
	32	Space	Wall	Finish 1	Plaster	13 mm thick dense plaster	plaster	3.04504
	32	Space	Wall	Intermediate finish 1	Timber	6.5 mm thick 35 mm wide timber laths	timber	0.22545
	32	Space	Wall	Non-Load Bearing Structure	Brick	220 mm thick brick	brick	69.3693
	32	Space	Wall	Intermediate support	Timber	140 mm thick studding at 600mm c/c spacing	timber studwork	1.77838
	32	Space	Wall	Intermediate finish 2	Timber	6.5 mm thick 35 mm wide timber laths	timber	0.22545
	32	Space	Wall	Finish 2	Plaster	13 mm thick dense plaster	plaster	3.04504
	32	Space	Floor	Finish 1	Floor finish	10 mm thick carpet/underlay	carpet/underlay	0.231
	32	Space	Floor	Intermediate finish 1	Timber	19 mm thick timber or chipboard	chipboard	1.3167
	32	Space	Floor	Finish 2	Plaster	13 mm thick dense plaster	plaster	1.95195
	32	Space	Opening	Door	Wooden Door	Forza FD60 Flush Solid Core Timber Door	timber	1.13994
	32	Services	Heating	Heat Source	Gas Boiler	20kW Mixed Wall mounted gas condensing boiler - MPX2 MI (FR)	steel	0.0181
	32	Services	Heating	Heat Source	Gas Boiler	20kW Mixed Wall mounted gas condensing boiler - MPX2 MI (FR)	aluminium	0.00193
	32	Services	Heating	Heat Source	Gas Boiler	20kW Mixed Wall mounted gas condensing boiler - MPX2 MI (FR)	brass	0.00135
	32	Services	Heating	Heat Source	Gas Boiler	20kW Mixed Wall mounted gas condensing boiler - MPX2 MI (FR)	plastic	0.00652
	32	Services	Heating	Emitter	Hot Water Radiator	1kW Therma Hot Water Radiator Range	steel	0.567308
	32	Services	Heating	Storage	Storage tank	606L HRI 600	steel	0.04476
	32	Services	Heating	Storage	Storage tank	606L HRI 600	stainless steel	0.03076
	32	Services	Heating	Storage	Storage tank	606L HRI 600	plastic	0.002796
	32	Services	Heating	Transportation	Heating pipe	15mm Plastic Pipe 1.5mm thickness	plastic	0.00647955
	32	Services	Electrical	Wiring	Electrical cable	2.5mm2 twin and earth cable	copper	0.00823284
	32	Services	Electrical	Wiring	Electrical cable	2.5mm2 twin and earth cable	plastic	0.00590436
	32	Services	Plumbing	Transportation	Plumbing pipe	32mm Plastic Waste Pipe 1.8 mm thickness	plastic	0.0188773
	32	Skin	Floor	Intermediate finish 1	Timber	19 mm thick timber or chipboard	chipboard	1.3167
	32	Structure	Wall	Load bearing	Stone	600mm thick granite	granite	562.162
	32	Structure	Floor	Load bearing	Insitu Concrete	65 mm thick cast concrete	concrete	30.03
	32	Structure	Roof	Load bearing	Timber	100 mm thick timber rafters at 600mm c/c spacing	timber	0.814275
	32	Skin	Roof	Finish 1	Timber	19 mm thick timber or chipboard	chipboard	1.3167
	33	Skin	Wall	Internal finish	Plaster	13 mm thick dense plaster	plaster	6.09008
	33	Skin	Floor	Finish 1	Floor finish	10 mm thick carpet/underlay	carpet/underlay	0.231
	33	Skin	Floor	Intermediate finish 1	Screed	75 mm thick screed	screed	10.395
	33	Skin	Opening	Door	Wooden door	OPUS Wooden Front Doors with glass	timber	0.363825
	33	Skin	Opening	Door	Wooden door	OPUS Wooden Front Doors with glass	glass	0.0606375
	33	Skin	Opening	Window	Wooden frame window	Side hung window 3-glass Alu - AFSC	timber	0.305956
	33	Skin	Opening	Window	Wooden frame window	Side hung window 3-glass Alu - AFSC	glass	0.73423
	33	Space	Wall	Finish 1	Plaster	13 mm thick dense plaster	plaster	3.04504
	33	Space	Wall	Intermediate finish 1	Timber	6.5 mm thick 35 mm wide timber laths	timber	0.22545
	33	Space	Wall	Non-Load Bearing Structure	Brick	215 mm thick brick	brick	67.7927
	33	Space	Wall	Intermediate support	Timber	95 mm thick studding at 600mm c/c spacing	timber studwork	1.20676
	33	Space	Wall	Intermediate finish 2	Timber	6.5 mm thick 35 mm wide timber laths	timber	0.22545
	33	Space	Wall	Finish 2	Plaster	13 mm thick lightweight plaster	plaster	1.4054
	33	Space	Floor	Finish 1	Floor finish	10 mm thick carpet/underlay	carpet/underlay	0.231
	33	Space	Floor	Intermediate finish 1	Screed	50 mm thick screed	screed	6.93
	33	Space	Floor	Finish 2	Plaster	13 mm thick lightweight plaster	plaster	0.9009
	33	Space	Opening	Door	Wooden Door	Forza FD60 Flush Solid Core Timber Door	timber	1.13994
	33	Services	Heating	Heat Source	Gas Boiler	25kW ecoTEC plus VUW 25/32CS/1-5 (N-FR)	steel	0.01556
	33	Services	Heating	Heat Source	Gas Boiler	25kW ecoTEC plus VUW 25/32CS/1-5 (N-FR)	stainless steel	0.0094
	33	Services	Heating	Heat Source	Gas Boiler	25kW ecoTEC plus VUW 25/32CS/1-5 (N-FR)	aluminium	0.00245
	33	Services	Heating	Heat Source	Gas Boiler	25kW ecoTEC plus VUW 25/32CS/1-5 (N-FR)	copper	0.00275
	33	Services	Heating	Heat Source	Gas Boiler	25kW ecoTEC plus VUW 25/32CS/1-5 (N-FR)	brass	0.00269
	33	Services	Heating	Heat Source	Gas Boiler	25kW ecoTEC plus VUW 25/32CS/1-5 (N-FR)	plastic	0.00355
	33	Services	Heating	Emitter	Hot Water Radiator	1kW Fassane Pack double Ã ailettes	steel	0.707211
	33	Services	Heating	Emitter	Hot Water Radiator	1kW Fassane Pack double Ã ailettes	brass	0.0022638
	33	Services	Heating	Emitter	Hot Water Radiator	1kW Fassane Pack double Ã ailettes	plastic	0.00543312
	33	Services	Heating	Storage	Storage tank	300L Atlantic Mileo + 300	stainless steel	0.01382
	33	Services	Heating	Storage	Storage tank	300L Atlantic Mileo + 300	plastic	0.01244
	33	Services	Heating	Transportation	Heating pipe	15mm Copper Pipe 0.7mm thickness	copper	0.0213444
	33	Services	Electrical	Wiring	Electrical cable	1.5mm2 twin and earth cable	copper	0.00557172
	33	Services	Electrical	Wiring	Electrical cable	1.5mm2 twin and earth cable	plastic	0.00399168
	33	Services	Plumbing	Transportation	Plumbing pipe	32mm Plastic Waste Pipe 1.8 mm thickness	plastic	0.0188773
	33	Structure	Wall	Load bearing	Stone	600mm thick limestone	limestone	475.675
	33	Structure	Floor	Load bearing	Timber	100 mm thick timber joists at 600mm c/c spacing	timber	1.62855
	33	Structure	Roof	Load bearing	Timber	150 mm thick timber rafters at 600mm c/c spacing	timber	1.22141
	33	Skin	Roof	Finish 1	Timber	19 mm thick timber or chipboard	chipboard	1.3167
	34	Skin	Wall	Internal finish	Plaster	13 mm thick lightweight plaster	plaster	2.81081
	34	Skin	Floor	Finish 1	Floor finish	10 mm thick carpet/underlay	carpet/underlay	0.231
	34	Skin	Opening	Door	Steel door	Steel doors S30/Y30 - S63/Y63	timber	0.00545738
	34	Skin	Opening	Window	Composite frame window	Viking SW17 Aluclad Window Viking SW17 Wooden Window	timber	0.27054
	34	Skin	Opening	Window	Composite frame window	Viking SW17 Aluclad Window Viking SW17 Wooden Window	glass	0.757185
	34	Space	Wall	Finish 1	Plaster	13 mm thick dense plaster	plaster	3.04504
	34	Space	Wall	Intermediate finish 1	Timber	6.5 mm thick 35 mm wide timber laths	timber	0.22545
	34	Space	Wall	Non-Load Bearing Structure	Brick	105 mm thick brick	brick	33.1081
	34	Space	Wall	Intermediate support	Timber	95 mm thick studding at 600mm c/c spacing	timber studwork	1.20676
	34	Space	Wall	Intermediate finish 2	Timber	6.5 mm thick 35 mm wide timber laths	timber	0.22545
	34	Space	Wall	Finish 2	Plaster	13 mm thick dense plaster	plaster	3.04504
	34	Space	Floor	Finish 1	Floor finish	10 mm thick carpet/underlay	carpet/underlay	0.231
	34	Space	Floor	Intermediate finish 1	Screed	75 mm thick screed	screed	10.395
	34	Space	Floor	Finish 2	Plaster	13 mm thick lightweight plaster	plaster	0.9009
	34	Space	Opening	Door	Wooden Door	Forza FD60 Flush Solid Core Timber Door	timber	1.13994
	34	Services	Heating	Heat Source	Gas Boiler	18.5kW Naia 3 micro 25	steel	0.00528
	34	Services	Heating	Heat Source	Gas Boiler	18.5kW Naia 3 micro 25	stainless steel	0.00513
	34	Services	Heating	Heat Source	Gas Boiler	18.5kW Naia 3 micro 25	aluminium	0.0018
	34	Services	Heating	Heat Source	Gas Boiler	18.5kW Naia 3 micro 25	plastic	0.00538
	34	Services	Heating	Emitter	Hot Water Radiator	1kW Fassane Pack double Ã ailettes	steel	0.707211
	34	Services	Heating	Emitter	Hot Water Radiator	1kW Fassane Pack double Ã ailettes	brass	0.0022638
	34	Services	Heating	Emitter	Hot Water Radiator	1kW Fassane Pack double Ã ailettes	plastic	0.00543312
	34	Services	Heating	Storage	Storage tank	300L Atlantic Mileo + 300	stainless steel	0.01382
	34	Services	Heating	Storage	Storage tank	300L Atlantic Mileo + 300	plastic	0.01244
	34	Services	Heating	Transportation	Heating pipe	22mm Copper Pipe 0.9mm thickness	copper	0.0404019
	34	Services	Electrical	Wiring	Electrical cable	2.5mm2 twin and earth cable	copper	0.00823284
	34	Services	Electrical	Wiring	Electrical cable	2.5mm2 twin and earth cable	plastic	0.00590436
	34	Services	Plumbing	Transportation	Plumbing pipe	160mm Plastic Soil Pipe 6.2 mm thickness	plastic	0.331309
	34	Skin	Floor	Intermediate finish 1	Timber	19 mm thick timber or chipboard	chipboard	1.3167
	34	Structure	Wall	Load bearing	Stone	600mm thick slate	slate	605.405
	34	Structure	Floor	Load bearing	Timber	125 mm thick timber joists at 600mm c/c spacing	timber	2.035
	34	Structure	Roof	Load bearing	Insitu Concrete	150 mm thick cast concrete	concrete	34.65
	34	Skin	Roof	Finish 1	Timber	19 mm thick timber or chipboard	chipboard	1.3167
	35	Skin	Wall	Internal finish	Plaster	13 mm thick lightweight plaster	plaster	2.81081
	35	Skin	Floor	Finish 1	Floor finish	10 mm thick carpet/underlay	carpet/underlay	0.231
	35	Skin	Floor	Intermediate finish 1	Screed	75 mm thick screed	screed	10.395
	35	Skin	Opening	Door	Steel door	Steel doors S30/Y30 - S63/Y63	timber	0.00545738
	35	Skin	Opening	Window	Composite frame window	SERIE STH ECO Â– WINDOW SYSTEM	timber	0.178721
	35	Skin	Opening	Window	Composite frame window	SERIE STH ECO Â– WINDOW SYSTEM	glass	0.762104
	35	Space	Wall	Finish 1	Plaster	13 mm thick dense plaster	plaster	3.04504
	35	Space	Wall	Intermediate finish 1	Timber	6.5 mm thick 35 mm wide timber laths	timber	0.22545
	35	Space	Wall	Non-Load Bearing Structure	Brick	215 mm thick brick	brick	67.7927
	35	Space	Wall	Intermediate support	Timber	95 mm thick studding at 600mm c/c spacing	timber studwork	1.20676
	35	Space	Wall	Intermediate finish 2	Timber	6.5 mm thick 35 mm wide timber laths	timber	0.22545
	35	Space	Wall	Finish 2	Plaster	13 mm thick dense plaster	plaster	3.04504
	35	Space	Floor	Finish 1	Floor finish	10 mm thick carpet/underlay	carpet/underlay	0.231
	35	Space	Floor	Intermediate finish 1	Timber	19 mm thick timber or chipboard	chipboard	1.3167
	35	Space	Floor	Finish 2	Plaster	13 mm thick lightweight plaster	plaster	0.9009
	35	Space	Opening	Door	Wooden Door	Forza FD60 Flush Solid Core Timber Door	timber	1.13994
	35	Services	Heating	Heat Source	Gas Boiler	20 kW TZERRA Ace-Matic (NL)	steel	0.00821
	35	Services	Heating	Heat Source	Gas Boiler	20 kW TZERRA Ace-Matic (NL)	stainless steel	0.00627
	35	Services	Heating	Heat Source	Gas Boiler	20 kW TZERRA Ace-Matic (NL)	aluminium	0.00189
	35	Services	Heating	Heat Source	Gas Boiler	20 kW TZERRA Ace-Matic (NL)	copper	0.00101
	35	Services	Heating	Heat Source	Gas Boiler	20 kW TZERRA Ace-Matic (NL)	plastic	0.00674
	35	Services	Heating	Emitter	Hot Water Radiator	1kW Therma Hot Water Radiator Range	steel	0.567308
	35	Services	Heating	Storage	Storage tank	606L HRI 600	steel	0.04476
	35	Services	Heating	Storage	Storage tank	606L HRI 600	stainless steel	0.03076
	35	Services	Heating	Storage	Storage tank	606L HRI 600	plastic	0.002796
	35	Services	Heating	Transportation	Heating pipe	15mm Plastic Pipe 1.5mm thickness	plastic	0.00647955
	35	Services	Electrical	Wiring	Electrical cable	2.5mm2 twin and earth cable	copper	0.00823284
	35	Services	Electrical	Wiring	Electrical cable	2.5mm2 twin and earth cable	plastic	0.00590436
	35	Services	Plumbing	Transportation	Plumbing pipe	110mm Plastic Soil Pipe 4.2 mm thickness	plastic	0.154428
	35	Structure	Wall	Load bearing	Stone	600mm thick granite	granite	562.162
	35	Structure	Floor	Load bearing	Timber	125 mm thick timber joists at 600mm c/c spacing	timber	2.035
	35	Structure	Roof	Load bearing	Timber	100 mm thick timber rafters at 600mm c/c spacing	timber	0.814275
	35	Skin	Roof	Finish 1	Timber	19 mm thick timber or chipboard	chipboard	1.3167
	36	Skin	Wall	Internal finish	Plaster	13 mm thick dense plaster	plaster	6.09008
	36	Skin	Floor	Finish 1	Floor finish	10 mm thick carpet/underlay	carpet/underlay	0.231
	36	Skin	Opening	Door	Wooden door	OPUS Wooden Front Doors with glass	timber	0.363825
	36	Skin	Opening	Door	Wooden door	OPUS Wooden Front Doors with glass	glass	0.0606375
	36	Skin	Opening	Window	Composite frame window	SERIE STH ECO Â– WINDOW SYSTEM	timber	0.178721
	36	Skin	Opening	Window	Composite frame window	SERIE STH ECO Â– WINDOW SYSTEM	glass	0.762104
	36	Space	Wall	Finish 1	Plaster	13 mm thick lightweight plaster	plaster	1.4054
	36	Space	Wall	Intermediate finish 1	Timber	6.5 mm thick 35 mm wide timber laths	timber	0.22545
	36	Space	Wall	Non-Load Bearing Structure	Brick	220 mm thick brick	brick	69.3693
	36	Space	Wall	Intermediate support	Timber	140 mm thick studding at 600mm c/c spacing	timber studwork	1.77838
	36	Space	Wall	Intermediate finish 2	Timber	6.5 mm thick 35 mm wide timber laths	timber	0.22545
	36	Space	Wall	Finish 2	Plaster	13 mm thick lightweight plaster	plaster	1.4054
	36	Space	Floor	Finish 1	Floor finish	10 mm thick carpet/underlay	carpet/underlay	0.231
	36	Space	Floor	Intermediate finish 1	Timber	19 mm thick timber or chipboard	chipboard	1.3167
	36	Space	Floor	Finish 2	Plaster	13 mm thick dense plaster	plaster	1.95195
	36	Space	Opening	Door	Wooden Door	Forza FD60 Flush Solid Core Timber Door	timber	1.13994
	36	Services	Heating	Heat Source	Gas Boiler	24kW TZERRA Ace-Matic (BE)	steel	0.01267
	36	Services	Heating	Heat Source	Gas Boiler	24kW TZERRA Ace-Matic (BE)	stainless steel	0.01267
	36	Services	Heating	Heat Source	Gas Boiler	24kW TZERRA Ace-Matic (BE)	aluminium	0.00635
	36	Services	Heating	Heat Source	Gas Boiler	24kW TZERRA Ace-Matic (BE)	brass	0.00162
	36	Services	Heating	Heat Source	Gas Boiler	24kW TZERRA Ace-Matic (BE)	plastic	0.00694
	36	Services	Heating	Emitter	Hot Water Radiator	1kW Classic Hot Water Radiator Range	steel	0.456382
	36	Services	Heating	Storage	Storage tank	300L Atlantic Mileo + 300	stainless steel	0.01382
	36	Services	Heating	Storage	Storage tank	300L Atlantic Mileo + 300	plastic	0.01244
	36	Services	Heating	Transportation	Heating pipe	15mm Copper Pipe 0.7mm thickness	copper	0.0213444
	36	Services	Electrical	Wiring	Electrical cable	2.5mm2 twin and earth cable	copper	0.00823284
	36	Services	Electrical	Wiring	Electrical cable	2.5mm2 twin and earth cable	plastic	0.00590436
	36	Services	Plumbing	Transportation	Plumbing pipe	32mm Plastic Waste Pipe 1.8 mm thickness	plastic	0.0188773
	36	Skin	Floor	Intermediate finish 1	Timber	19 mm thick timber or chipboard	chipboard	1.3167
	36	Structure	Wall	Load bearing	Brick	105 mm thick brick	brick	66.2161
	36	Structure	Floor	Load bearing	Insitu Concrete	65 mm thick cast concrete	concrete	30.03
	36	Structure	Roof	Load bearing	Timber	100 mm thick timber rafters at 600mm c/c spacing	timber	0.814275
	36	Skin	Roof	Finish 1	Timber	19 mm thick timber or chipboard	chipboard	1.3167
	37	Skin	Wall	Internal finish	Plaster	13 mm thick dense plaster	plaster	6.09008
	37	Skin	Floor	Finish 1	Floor finish	10 mm thick carpet/underlay	carpet/underlay	0.231
	37	Skin	Opening	Door	Steel door	Steel doors S30/Y30 - S63/Y63	timber	0.00545738
	37	Skin	Opening	Window	Wooden frame window	VELFAC Classic woodÂ–Top-guided window	timber	0.343012
	37	Skin	Opening	Window	Wooden frame window	VELFAC Classic woodÂ–Top-guided window	glass	0.723736
	37	Space	Wall	Finish 1	Plaster	13 mm thick lightweight plaster	plaster	1.4054
	37	Space	Wall	Intermediate finish 1	Timber	6.5 mm thick 35 mm wide timber laths	timber	0.22545
	37	Space	Wall	Non-Load Bearing Structure	Brick	220 mm thick brick	brick	69.3693
	37	Space	Wall	Intermediate support	Timber	95 mm thick studding at 600mm c/c spacing	timber studwork	1.20676
	37	Space	Wall	Intermediate finish 2	Timber	6.5 mm thick 35 mm wide timber laths	timber	0.22545
	37	Space	Wall	Finish 2	Plaster	13 mm thick lightweight plaster	plaster	1.4054
	37	Space	Floor	Finish 1	Floor finish	10 mm thick carpet/underlay	carpet/underlay	0.231
	37	Space	Floor	Intermediate finish 1	Screed	75 mm thick screed	screed	10.395
	37	Space	Floor	Finish 2	Plaster	13 mm thick dense plaster	plaster	1.95195
	37	Space	Opening	Door	Wooden Door	Forza FD60 Flush Solid Core Timber Door	timber	1.13994
	37	Services	Heating	Heat Source	Gas Boiler	24kW Mixed Wall mounted gas condensing boiler - MCR-S	steel	0.01081
	37	Services	Heating	Heat Source	Gas Boiler	24kW Mixed Wall mounted gas condensing boiler - MCR-S	stainless steel	0.0076
	37	Services	Heating	Heat Source	Gas Boiler	24kW Mixed Wall mounted gas condensing boiler - MCR-S	aluminium	0.00168
	37	Services	Heating	Heat Source	Gas Boiler	24kW Mixed Wall mounted gas condensing boiler - MCR-S	plastic	0.00667
	37	Services	Heating	Emitter	Hot Water Radiator	1kW Galant Hot Water Radiator Range	steel	0.678234
	37	Services	Heating	Storage	Storage tank	606L HRI 600	steel	0.04476
	37	Services	Heating	Storage	Storage tank	606L HRI 600	stainless steel	0.03076
	37	Services	Heating	Storage	Storage tank	606L HRI 600	plastic	0.002796
	37	Services	Heating	Transportation	Heating pipe	15mm Plastic Pipe 1.5mm thickness	plastic	0.00647955
	37	Services	Electrical	Wiring	Electrical cable	1.5mm2 twin and earth cable	copper	0.00557172
	37	Services	Electrical	Wiring	Electrical cable	1.5mm2 twin and earth cable	plastic	0.00399168
	37	Services	Plumbing	Transportation	Plumbing pipe	32mm Plastic Waste Pipe 1.8 mm thickness	plastic	0.0188773
	37	Skin	Floor	Intermediate finish 1	Timber	19 mm thick timber or chipboard	chipboard	1.3167
	37	Structure	Wall	Load bearing	Brick	105 mm thick brick	brick	66.2161
	37	Structure	Floor	Load bearing	Insitu Concrete	150 mm thick cast concrete	concrete	69.3
	37	Structure	Roof	Load bearing	Insitu Concrete	80 mm thick concrete	concrete	18.48
	37	Skin	Roof	Finish 1	Timber	19 mm thick timber or chipboard	chipboard	1.3167
	38	Skin	Wall	Internal finish	Plaster	13 mm thick lightweight plaster	plaster	2.81081
	38	Skin	Floor	Finish 1	Floor finish	10 mm thick carpet/underlay	carpet/underlay	0.231
	38	Skin	Opening	Door	Wooden door	Rationel AURA / Rationel FORMA	timber	0.212035
	38	Skin	Opening	Door	Wooden door	Rationel AURA / Rationel FORMA	glass	0.318826
	38	Skin	Opening	Window	Wooden frame window	Side hung window 3-glass Alu - AFSC	timber	0.305956
	38	Skin	Opening	Window	Wooden frame window	Side hung window 3-glass Alu - AFSC	glass	0.73423
	38	Space	Wall	Finish 1	Plaster	13 mm thick dense plaster	plaster	3.04504
	38	Space	Wall	Intermediate finish 1	Timber	6.5 mm thick 35 mm wide timber laths	timber	0.22545
	38	Space	Wall	Non-Load Bearing Structure	Brick	220 mm thick brick	brick	69.3693
	38	Space	Wall	Intermediate support	Timber	140 mm thick studding at 600mm c/c spacing	timber studwork	1.77838
	38	Space	Wall	Intermediate finish 2	Timber	6.5 mm thick 35 mm wide timber laths	timber	0.22545
	38	Space	Wall	Finish 2	Plaster	13 mm thick dense plaster	plaster	3.04504
	38	Space	Floor	Finish 1	Floor finish	10 mm thick carpet/underlay	carpet/underlay	0.231
	38	Space	Floor	Intermediate finish 1	Timber	19 mm thick timber or chipboard	chipboard	1.3167
	38	Space	Floor	Finish 2	Plaster	13 mm thick lightweight plaster	plaster	0.9009
	38	Space	Opening	Door	Wooden Door	Forza FD60 Flush Solid Core Timber Door	timber	1.13994
	38	Services	Heating	Heat Source	Gas Boiler	24kW Mixed Wall mounted gas condensing boiler - MCR-S	steel	0.01081
	38	Services	Heating	Heat Source	Gas Boiler	24kW Mixed Wall mounted gas condensing boiler - MCR-S	stainless steel	0.0076
	38	Services	Heating	Heat Source	Gas Boiler	24kW Mixed Wall mounted gas condensing boiler - MCR-S	aluminium	0.00168
	38	Services	Heating	Heat Source	Gas Boiler	24kW Mixed Wall mounted gas condensing boiler - MCR-S	plastic	0.00667
	38	Services	Heating	Emitter	Hot Water Radiator	1kW Fassane Pack double Ã ailettes	steel	0.707211
	38	Services	Heating	Emitter	Hot Water Radiator	1kW Fassane Pack double Ã ailettes	brass	0.0022638
	38	Services	Heating	Emitter	Hot Water Radiator	1kW Fassane Pack double Ã ailettes	plastic	0.00543312
	38	Services	Heating	Storage	Storage tank	300L Atlantic Mileo + 300	stainless steel	0.01382
	38	Services	Heating	Storage	Storage tank	300L Atlantic Mileo + 300	plastic	0.01244
	38	Services	Heating	Transportation	Heating pipe	15mm Copper Pipe 0.7mm thickness	copper	0.0213444
	38	Services	Electrical	Wiring	Electrical cable	1.5mm2 twin and earth cable	copper	0.00557172
	38	Services	Electrical	Wiring	Electrical cable	1.5mm2 twin and earth cable	plastic	0.00399168
	38	Services	Plumbing	Transportation	Plumbing pipe	40mm Plastic Waste Pipe 1.9 mm thickness	plastic	0.0251143
	38	Skin	Floor	Intermediate finish 1	Timber	19 mm thick timber or chipboard	chipboard	1.3167
	38	Structure	Wall	Load bearing	Brick	105 mm thick brick	brick	66.2161
	38	Structure	Floor	Load bearing	Timber	150 mm thick timber joists at 600mm c/c spacing	timber	2.44283
	38	Structure	Roof	Load bearing	Timber	125 mm thick timber rafters at 600mm c/c spacing	timber	1.01784
	38	Skin	Roof	Finish 1	Timber	19 mm thick timber or chipboard	chipboard	1.3167
	39	Skin	Wall	Internal finish	Plaster	13 mm thick dense plaster	plaster	6.09008
	39	Skin	Floor	Finish 1	Floor finish	10 mm thick carpet/underlay	carpet/underlay	0.231
	39	Skin	Opening	Door	Wooden door	ST10 Ei30 RW43 RC2 with glass	timber	0.46897
	39	Skin	Opening	Door	Wooden door	ST10 Ei30 RW43 RC2 with glass	glass	0.157658
	39	Skin	Opening	Window	Metal frame window	forster unico Windows	glass	1.62547
	39	Space	Wall	Finish 1	Plaster	13 mm thick lightweight plaster	plaster	1.4054
	39	Space	Wall	Intermediate finish 1	Timber	6.5 mm thick 35 mm wide timber laths	timber	0.22545
	39	Space	Wall	Non-Load Bearing Structure	Brick	215 mm thick brick	brick	67.7927
	39	Space	Wall	Intermediate support	Timber	95 mm thick studding at 600mm c/c spacing	timber studwork	1.20676
	39	Space	Wall	Intermediate finish 2	Timber	6.5 mm thick 35 mm wide timber laths	timber	0.22545
	39	Space	Wall	Finish 2	Plaster	13 mm thick lightweight plaster	plaster	1.4054
	39	Space	Floor	Finish 1	Floor finish	10 mm thick carpet/underlay	carpet/underlay	0.231
	39	Space	Floor	Intermediate finish 1	Timber	19 mm thick timber or chipboard	chipboard	1.3167
	39	Space	Floor	Finish 2	Plaster	13 mm thick dense plaster	plaster	1.95195
	39	Space	Opening	Door	Wooden Door	Forza FD60 Flush Solid Core Timber Door	timber	1.13994
	39	Services	Heating	Heat Source	Gas Boiler	20kW AVANTA ACE (export)	steel	0.01187
	39	Services	Heating	Heat Source	Gas Boiler	20kW AVANTA ACE (export)	stainless steel	0.00661
	39	Services	Heating	Heat Source	Gas Boiler	20kW AVANTA ACE (export)	aluminium	0.00184
	39	Services	Heating	Heat Source	Gas Boiler	20kW AVANTA ACE (export)	copper	0.00101
	39	Services	Heating	Heat Source	Gas Boiler	20kW AVANTA ACE (export)	plastic	0.00695
	39	Services	Heating	Emitter	Hot Water Radiator	1kW Therma Hot Water Radiator Range	steel	0.567308
	39	Services	Heating	Storage	Storage tank	300L ACV SMART E	steel	0.01442
	39	Services	Heating	Storage	Storage tank	300L ACV SMART E	stainless steel	0.00752
	39	Services	Heating	Storage	Storage tank	300L ACV SMART E	plastic	0.007012
	39	Services	Heating	Transportation	Heating pipe	15mm Copper Pipe 0.7mm thickness	copper	0.0213444
	39	Services	Electrical	Wiring	Electrical cable	1.5mm2 twin and earth cable	copper	0.00557172
	39	Services	Electrical	Wiring	Electrical cable	1.5mm2 twin and earth cable	plastic	0.00399168
	39	Services	Plumbing	Transportation	Plumbing pipe	110mm Plastic Soil Pipe 4.2 mm thickness	plastic	0.154428
	39	Skin	Floor	Intermediate finish 1	Timber	19 mm thick timber or chipboard	chipboard	1.3167
	39	Structure	Wall	Load bearing	Stone	600mm thick slate	slate	605.405
	39	Structure	Floor	Load bearing	Timber	200 mm thick timber joists at 600mm c/c spacing	timber	3.2571
	39	Structure	Roof	Load bearing	Timber	35 mm thick fink truss at 600mm c/c spacing	timber	1.32132
	39	Skin	Roof	Finish 1	Timber	19 mm thick timber or chipboard	chipboard	1.3167
	40	Skin	Wall	Internal finish	Plaster	13 mm thick lightweight plaster	plaster	2.81081
	40	Skin	Floor	Finish 1	Floor finish	10 mm thick carpet/underlay	carpet/underlay	0.231
	40	Skin	Floor	Intermediate finish 1	Screed	75 mm thick screed	screed	10.395
	40	Skin	Opening	Door	Steel door	Steel doors S30/Y30 - S63/Y63	timber	0.00545738
	40	Skin	Opening	Window	Metal frame window	hinged windows, series ITESAL 45, coated	glass	0.406126
	40	Space	Wall	Finish 1	Plaster	13 mm thick lightweight plaster	plaster	1.4054
	40	Space	Wall	Intermediate finish 1	Timber	6.5 mm thick 35 mm wide timber laths	timber	0.22545
	40	Space	Wall	Non-Load Bearing Structure	Brick	215 mm thick brick	brick	67.7927
	40	Space	Wall	Intermediate support	Timber	140 mm thick studding at 600mm c/c spacing	timber studwork	1.77838
	40	Space	Wall	Intermediate finish 2	Timber	6.5 mm thick 35 mm wide timber laths	timber	0.22545
	40	Space	Wall	Finish 2	Plaster	13 mm thick dense plaster	plaster	3.04504
	40	Space	Floor	Finish 1	Floor finish	10 mm thick carpet/underlay	carpet/underlay	0.231
	40	Space	Floor	Intermediate finish 1	Timber	19 mm thick timber or chipboard	chipboard	1.3167
	40	Space	Floor	Finish 2	Plaster	13 mm thick lightweight plaster	plaster	0.9009
	40	Space	Opening	Door	Wooden Door	Forza FD60 Flush Solid Core Timber Door	timber	1.13994
	40	Services	Heating	Heat Source	Gas Boiler	24kW TZERRA Ace-Matic (BE)	steel	0.01267
	40	Services	Heating	Heat Source	Gas Boiler	24kW TZERRA Ace-Matic (BE)	stainless steel	0.01267
	40	Services	Heating	Heat Source	Gas Boiler	24kW TZERRA Ace-Matic (BE)	aluminium	0.00635
	40	Services	Heating	Heat Source	Gas Boiler	24kW TZERRA Ace-Matic (BE)	brass	0.00162
	40	Services	Heating	Heat Source	Gas Boiler	24kW TZERRA Ace-Matic (BE)	plastic	0.00694
	40	Services	Heating	Emitter	Hot Water Radiator	1kW Therma Hot Water Radiator Range	steel	0.567308
	40	Services	Heating	Storage	Storage tank	300L ACV SMART E	steel	0.01442
	40	Services	Heating	Storage	Storage tank	300L ACV SMART E	stainless steel	0.00752
	40	Services	Heating	Storage	Storage tank	300L ACV SMART E	plastic	0.007012
	40	Services	Heating	Transportation	Heating pipe	22mm Plastic Pipe 2mm thickness	plastic	0.00670824
	40	Services	Electrical	Wiring	Electrical cable	2.5mm2 twin and earth cable	copper	0.00823284
	40	Services	Electrical	Wiring	Electrical cable	2.5mm2 twin and earth cable	plastic	0.00590436
	40	Services	Plumbing	Transportation	Plumbing pipe	50mm Plastic Waste Pipe 2.4 mm thickness	plastic	0.0396673
	40	Structure	Wall	Load bearing	Brick	105 mm thick brick	brick	66.2161
	40	Structure	Floor	Load bearing	Timber	200 mm thick timber joists at 600mm c/c spacing	timber	3.2571
	40	Structure	Roof	Load bearing	Timber	150 mm thick timber rafters at 600mm c/c spacing	timber	1.22141
	40	Skin	Roof	Finish 1	Timber	19 mm thick timber or chipboard	chipboard	1.3167
	41	Skin	Wall	Internal finish	Plaster	13 mm thick lightweight plaster	plaster	2.81081
	41	Skin	Floor	Finish 1	Floor finish	10 mm thick carpet/underlay	carpet/underlay	0.231
	41	Skin	Floor	Intermediate finish 1	Screed	75 mm thick screed	screed	10.395
	41	Skin	Opening	Door	Wooden door	Rationel AURAPLUS / Rationel FORMAPLUS - glazed	timber	0.202749
	41	Skin	Opening	Door	Wooden door	Rationel AURAPLUS / Rationel FORMAPLUS - glazed	glass	0.317279
	41	Skin	Opening	Window	Metal frame window	hinged windows, series ITESAL 45, coated	glass	0.406126
	41	Space	Wall	Finish 1	Plaster	13 mm thick lightweight plaster	plaster	1.4054
	41	Space	Wall	Intermediate finish 1	Timber	6.5 mm thick 35 mm wide timber laths	timber	0.22545
	41	Space	Wall	Non-Load Bearing Structure	Brick	220 mm thick brick	brick	69.3693
	41	Space	Wall	Intermediate support	Timber	140 mm thick studding at 600mm c/c spacing	timber studwork	1.77838
	41	Space	Wall	Intermediate finish 2	Timber	6.5 mm thick 35 mm wide timber laths	timber	0.22545
	41	Space	Wall	Finish 2	Plaster	13 mm thick dense plaster	plaster	3.04504
	41	Space	Floor	Finish 1	Floor finish	10 mm thick carpet/underlay	carpet/underlay	0.231
	41	Space	Floor	Intermediate finish 1	Timber	19 mm thick timber or chipboard	chipboard	1.3167
	41	Space	Floor	Finish 2	Plaster	13 mm thick dense plaster	plaster	1.95195
	41	Space	Opening	Door	Wooden Door	Forza FD60 Flush Solid Core Timber Door	timber	1.13994
	41	Services	Heating	Heat Source	Gas Boiler	16kW Mixed Wall mounted gas condensing boiler - Accea	steel	0.01191
	41	Services	Heating	Heat Source	Gas Boiler	16kW Mixed Wall mounted gas condensing boiler - Accea	stainless steel	0.00835
	41	Services	Heating	Heat Source	Gas Boiler	16kW Mixed Wall mounted gas condensing boiler - Accea	aluminium	0.00186
	41	Services	Heating	Heat Source	Gas Boiler	16kW Mixed Wall mounted gas condensing boiler - Accea	copper	0.00104
	41	Services	Heating	Heat Source	Gas Boiler	16kW Mixed Wall mounted gas condensing boiler - Accea	plastic	0.00692
	41	Services	Heating	Emitter	Hot Water Radiator	1kW Classic Hot Water Radiator Range	steel	0.456382
	41	Services	Heating	Storage	Storage tank	606L HRI 600	steel	0.04476
	41	Services	Heating	Storage	Storage tank	606L HRI 600	stainless steel	0.03076
	41	Services	Heating	Storage	Storage tank	606L HRI 600	plastic	0.002796
	41	Services	Heating	Transportation	Heating pipe	22mm Plastic Pipe 2mm thickness	plastic	0.00670824
	41	Services	Electrical	Wiring	Electrical cable	2.5mm2 twin and earth cable	copper	0.00823284
	41	Services	Electrical	Wiring	Electrical cable	2.5mm2 twin and earth cable	plastic	0.00590436
	41	Services	Plumbing	Transportation	Plumbing pipe	110mm Plastic Soil Pipe 4.2 mm thickness	plastic	0.154428
	41	Structure	Wall	Load bearing	Brick	105 mm thick brick	brick	66.2161
	41	Structure	Floor	Load bearing	Timber	100 mm thick timber joists at 600mm c/c spacing	timber	1.62855
	41	Structure	Roof	Load bearing	Timber	35 mm thick fink truss at 600mm c/c spacing	timber	1.32132
	41	Skin	Roof	Finish 1	Timber	19 mm thick timber or chipboard	chipboard	1.3167
	42	Skin	Wall	Internal finish	Plaster	13 mm thick lightweight plaster	plaster	2.81081
	42	Skin	Floor	Finish 1	Floor finish	10 mm thick carpet/underlay	carpet/underlay	0.231
	42	Skin	Opening	Door	Wooden door	Rationel AURAPLUS / Rationel FORMAPLUS - glazed	timber	0.202749
	42	Skin	Opening	Door	Wooden door	Rationel AURAPLUS / Rationel FORMAPLUS - glazed	glass	0.317279
	42	Skin	Opening	Window	Composite frame window	Viking SW17 Aluclad Window Viking SW17 Wooden Window	timber	0.27054
	42	Skin	Opening	Window	Composite frame window	Viking SW17 Aluclad Window Viking SW17 Wooden Window	glass	0.757185
	42	Space	Wall	Finish 1	Plaster	13 mm thick dense plaster	plaster	3.04504
	42	Space	Wall	Intermediate finish 1	Timber	6.5 mm thick 35 mm wide timber laths	timber	0.22545
	42	Space	Wall	Non-Load Bearing Structure	Brick	220 mm thick brick	brick	69.3693
	42	Space	Wall	Intermediate support	Timber	25 mm thick timber battens at 600mm c/c spacing	timber studwork	0.317567
	42	Space	Wall	Intermediate finish 2	Timber	6.5 mm thick 35 mm wide timber laths	timber	0.22545
	42	Space	Wall	Finish 2	Plaster	13 mm thick lightweight plaster	plaster	1.4054
	42	Space	Floor	Finish 1	Floor finish	10 mm thick carpet/underlay	carpet/underlay	0.231
	42	Space	Floor	Intermediate finish 1	Timber	19 mm thick timber or chipboard	chipboard	1.3167
	42	Space	Floor	Finish 2	Plaster	13 mm thick dense plaster	plaster	1.95195
	42	Space	Opening	Door	Wooden Door	Forza FD60 Flush Solid Core Timber Door	timber	1.13994
	42	Services	Heating	Heat Source	Gas Boiler	24kW TZERRA Ace-Matic System (BE)	steel	0.01267
	42	Services	Heating	Heat Source	Gas Boiler	24kW TZERRA Ace-Matic System (BE)	stainless steel	0.00553
	42	Services	Heating	Heat Source	Gas Boiler	24kW TZERRA Ace-Matic System (BE)	aluminium	0.00191
	42	Services	Heating	Heat Source	Gas Boiler	24kW TZERRA Ace-Matic System (BE)	brass	0.00162
	42	Services	Heating	Heat Source	Gas Boiler	24kW TZERRA Ace-Matic System (BE)	plastic	0.00693
	42	Services	Heating	Emitter	Hot Water Radiator	1kW Classic Hot Water Radiator Range	steel	0.456382
	42	Services	Heating	Storage	Storage tank	300L Atlantic Mileo + 300	stainless steel	0.01382
	42	Services	Heating	Storage	Storage tank	300L Atlantic Mileo + 300	plastic	0.01244
	42	Services	Heating	Transportation	Heating pipe	15mm Plastic Pipe 1.5mm thickness	plastic	0.00647955
	42	Services	Electrical	Wiring	Electrical cable	2.5mm2 twin and earth cable	copper	0.00823284
	42	Services	Electrical	Wiring	Electrical cable	2.5mm2 twin and earth cable	plastic	0.00590436
	42	Services	Plumbing	Transportation	Plumbing pipe	110mm Plastic Soil Pipe 4.2 mm thickness	plastic	0.154428
	42	Skin	Floor	Intermediate finish 1	Timber	19 mm thick timber or chipboard	chipboard	1.3167
	42	Structure	Wall	Load bearing	Stone	600mm thick limestone	limestone	475.675
	42	Structure	Floor	Load bearing	Timber	150 mm thick timber joists at 600mm c/c spacing	timber	2.44283
	42	Structure	Roof	Load bearing	Insitu Concrete	150 mm thick cast concrete	concrete	34.65
	42	Skin	Roof	Finish 1	Timber	19 mm thick timber or chipboard	chipboard	1.3167
	43	Skin	Wall	Internal finish	Plaster	13 mm thick dense plaster	plaster	6.09008
	43	Skin	Floor	Finish 1	Floor finish	10 mm thick carpet/underlay	carpet/underlay	0.231
	43	Skin	Floor	Intermediate finish 1	Screed	50 mm thick screed	screed	6.93
	43	Skin	Opening	Door	Wooden door	Rationel AURAPLUS / Rationel FORMAPLUS - glazed	timber	0.202749
	43	Skin	Opening	Door	Wooden door	Rationel AURAPLUS / Rationel FORMAPLUS - glazed	glass	0.317279
	43	Skin	Opening	Window	Composite frame window	Viking SW17 Aluclad Window Viking SW17 Wooden Window	timber	0.27054
	43	Skin	Opening	Window	Composite frame window	Viking SW17 Aluclad Window Viking SW17 Wooden Window	glass	0.757185
	43	Space	Wall	Finish 1	Plaster	13 mm thick lightweight plaster	plaster	1.4054
	43	Space	Wall	Intermediate finish 1	Timber	6.5 mm thick 35 mm wide timber laths	timber	0.22545
	43	Space	Wall	Non-Load Bearing Structure	Brick	220 mm thick brick	brick	69.3693
	43	Space	Wall	Intermediate support	Timber	140 mm thick studding at 600mm c/c spacing	timber studwork	1.77838
	43	Space	Wall	Intermediate finish 2	Timber	6.5 mm thick 35 mm wide timber laths	timber	0.22545
	43	Space	Wall	Finish 2	Plaster	13 mm thick lightweight plaster	plaster	1.4054
	43	Space	Floor	Finish 1	Floor finish	10 mm thick carpet/underlay	carpet/underlay	0.231
	43	Space	Floor	Intermediate finish 1	Screed	50 mm thick screed	screed	6.93
	43	Space	Floor	Finish 2	Plaster	13 mm thick dense plaster	plaster	1.95195
	43	Space	Opening	Door	Wooden Door	Forza FD60 Flush Solid Core Timber Door	timber	1.13994
	43	Services	Heating	Heat Source	Gas Boiler	24kW TZERRA Ace-Matic System (BE)	steel	0.01267
	43	Services	Heating	Heat Source	Gas Boiler	24kW TZERRA Ace-Matic System (BE)	stainless steel	0.00553
	43	Services	Heating	Heat Source	Gas Boiler	24kW TZERRA Ace-Matic System (BE)	aluminium	0.00191
	43	Services	Heating	Heat Source	Gas Boiler	24kW TZERRA Ace-Matic System (BE)	brass	0.00162
	43	Services	Heating	Heat Source	Gas Boiler	24kW TZERRA Ace-Matic System (BE)	plastic	0.00693
	43	Services	Heating	Emitter	Hot Water Radiator	1kW Galant Hot Water Radiator Range	steel	0.678234
	43	Services	Heating	Storage	Storage tank	606L HRI 600	steel	0.04476
	43	Services	Heating	Storage	Storage tank	606L HRI 600	stainless steel	0.03076
	43	Services	Heating	Storage	Storage tank	606L HRI 600	plastic	0.002796
	43	Services	Heating	Transportation	Heating pipe	15mm Plastic Pipe 1.5mm thickness	plastic	0.00647955
	43	Services	Electrical	Wiring	Electrical cable	1.5mm2 twin and earth cable	copper	0.00557172
	43	Services	Electrical	Wiring	Electrical cable	1.5mm2 twin and earth cable	plastic	0.00399168
	43	Services	Plumbing	Transportation	Plumbing pipe	110mm Plastic Soil Pipe 4.2 mm thickness	plastic	0.154428
	43	Structure	Wall	Load bearing	Brick	105 mm thick brick	brick	66.2161
	43	Structure	Floor	Load bearing	Timber	125 mm thick timber joists at 600mm c/c spacing	timber	2.035
	43	Structure	Roof	Load bearing	Insitu Concrete	80 mm thick concrete	concrete	18.48
	43	Skin	Roof	Finish 1	Timber	19 mm thick timber or chipboard	chipboard	1.3167
	44	Skin	Wall	Internal finish	Plaster	13 mm thick lightweight plaster	plaster	2.81081
	44	Skin	Floor	Finish 1	Floor finish	10 mm thick carpet/underlay	carpet/underlay	0.231
	44	Skin	Floor	Intermediate finish 1	Screed	50 mm thick screed	screed	6.93
	44	Skin	Opening	Door	Steel door	Steel doors S30/Y30 - S63/Y63	timber	0.00545738
	44	Skin	Opening	Window	Composite frame window	Side-hung window 2+1 Kipp/Dreh - IKL-AL	timber	0.126908
	44	Skin	Opening	Window	Composite frame window	Side-hung window 2+1 Kipp/Dreh - IKL-AL	glass	0.736197
	44	Space	Wall	Finish 1	Plaster	13 mm thick lightweight plaster	plaster	1.4054
	44	Space	Wall	Intermediate finish 1	Timber	6.5 mm thick 35 mm wide timber laths	timber	0.22545
	44	Space	Wall	Non-Load Bearing Structure	Brick	105 mm thick brick	brick	33.1081
	44	Space	Wall	Intermediate support	Timber	140 mm thick studding at 600mm c/c spacing	timber studwork	1.77838
	44	Space	Wall	Intermediate finish 2	Timber	6.5 mm thick 35 mm wide timber laths	timber	0.22545
	44	Space	Wall	Finish 2	Plaster	13 mm thick dense plaster	plaster	3.04504
	44	Space	Floor	Finish 1	Floor finish	10 mm thick carpet/underlay	carpet/underlay	0.231
	44	Space	Floor	Intermediate finish 1	Screed	50 mm thick screed	screed	6.93
	44	Space	Floor	Finish 2	Plaster	13 mm thick dense plaster	plaster	1.95195
	44	Space	Opening	Door	Wooden Door	Forza FD60 Flush Solid Core Timber Door	timber	1.13994
	44	Services	Heating	Heat Source	Gas Boiler	16kW Mixed Wall mounted gas condensing boiler - Accea	steel	0.01191
	44	Services	Heating	Heat Source	Gas Boiler	16kW Mixed Wall mounted gas condensing boiler - Accea	stainless steel	0.00835
	44	Services	Heating	Heat Source	Gas Boiler	16kW Mixed Wall mounted gas condensing boiler - Accea	aluminium	0.00186
	44	Services	Heating	Heat Source	Gas Boiler	16kW Mixed Wall mounted gas condensing boiler - Accea	copper	0.00104
	44	Services	Heating	Heat Source	Gas Boiler	16kW Mixed Wall mounted gas condensing boiler - Accea	plastic	0.00692
	44	Services	Heating	Emitter	Hot Water Radiator	1kW Fassane Pack double Ã ailettes	steel	0.707211
	44	Services	Heating	Emitter	Hot Water Radiator	1kW Fassane Pack double Ã ailettes	brass	0.0022638
	44	Services	Heating	Emitter	Hot Water Radiator	1kW Fassane Pack double Ã ailettes	plastic	0.00543312
	44	Services	Heating	Storage	Storage tank	606L HRI 600	steel	0.04476
	44	Services	Heating	Storage	Storage tank	606L HRI 600	stainless steel	0.03076
	44	Services	Heating	Storage	Storage tank	606L HRI 600	plastic	0.002796
	44	Services	Heating	Transportation	Heating pipe	15mm Copper Pipe 0.7mm thickness	copper	0.0213444
	44	Services	Electrical	Wiring	Electrical cable	1.5mm2 twin and earth cable	copper	0.00557172
	44	Services	Electrical	Wiring	Electrical cable	1.5mm2 twin and earth cable	plastic	0.00399168
	44	Services	Plumbing	Transportation	Plumbing pipe	32mm Plastic Waste Pipe 1.8 mm thickness	plastic	0.0188773
	44	Structure	Wall	Load bearing	Brick	220 mm thick brick	brick	138.739
	44	Structure	Floor	Load bearing	Insitu Concrete	65 mm thick cast concrete	concrete	30.03
	44	Structure	Roof	Load bearing	Timber	35 mm thick fink truss at 600mm c/c spacing	timber	1.32132
	44	Skin	Roof	Finish 1	Timber	19 mm thick timber or chipboard	chipboard	1.3167
	45	Skin	Wall	Internal finish	Plaster	13 mm thick lightweight plaster	plaster	2.81081
	45	Skin	Floor	Finish 1	Floor finish	10 mm thick carpet/underlay	carpet/underlay	0.231
	45	Skin	Floor	Intermediate finish 1	Screed	50 mm thick screed	screed	6.93
	45	Skin	Opening	Door	Steel door	Steel doors S30/Y30 - S63/Y63	timber	0.00545738
	45	Skin	Opening	Window	Metal frame window	hinged windows, series ITESAL 45, coated	glass	0.406126
	45	Space	Wall	Finish 1	Plaster	13 mm thick dense plaster	plaster	3.04504
	45	Space	Wall	Intermediate finish 1	Timber	6.5 mm thick 35 mm wide timber laths	timber	0.22545
	45	Space	Wall	Non-Load Bearing Structure	Brick	105 mm thick brick	brick	33.1081
	45	Space	Wall	Intermediate support	Timber	140 mm thick studding at 600mm c/c spacing	timber studwork	1.77838
	45	Space	Wall	Intermediate finish 2	Timber	6.5 mm thick 35 mm wide timber laths	timber	0.22545
	45	Space	Wall	Finish 2	Plaster	13 mm thick lightweight plaster	plaster	1.4054
	45	Space	Floor	Finish 1	Floor finish	10 mm thick carpet/underlay	carpet/underlay	0.231
	45	Space	Floor	Intermediate finish 1	Screed	75 mm thick screed	screed	10.395
	45	Space	Floor	Finish 2	Plaster	13 mm thick dense plaster	plaster	1.95195
	45	Space	Opening	Door	Wooden Door	Forza FD60 Flush Solid Core Timber Door	timber	1.13994
	45	Services	Heating	Heat Source	Gas Boiler	12.25kW Condensing Boiler Alteas one + Net 24	steel	0.01852
	45	Services	Heating	Heat Source	Gas Boiler	12.25kW Condensing Boiler Alteas one + Net 24	aluminium	0.00173
	45	Services	Heating	Heat Source	Gas Boiler	12.25kW Condensing Boiler Alteas one + Net 24	copper	0.00193
	45	Services	Heating	Heat Source	Gas Boiler	12.25kW Condensing Boiler Alteas one + Net 24	glass	0.00278
	45	Services	Heating	Heat Source	Gas Boiler	12.25kW Condensing Boiler Alteas one + Net 24	plastic	0.0041
	45	Services	Heating	Emitter	Hot Water Radiator	1kW Classic Hot Water Radiator Range	steel	0.456382
	45	Services	Heating	Storage	Storage tank	300L Atlantic Mileo + 300	stainless steel	0.01382
	45	Services	Heating	Storage	Storage tank	300L Atlantic Mileo + 300	plastic	0.01244
	45	Services	Heating	Transportation	Heating pipe	15mm Copper Pipe 0.7mm thickness	copper	0.0213444
	45	Services	Electrical	Wiring	Electrical cable	2.5mm2 twin and earth cable	copper	0.00823284
	45	Services	Electrical	Wiring	Electrical cable	2.5mm2 twin and earth cable	plastic	0.00590436
	45	Services	Plumbing	Transportation	Plumbing pipe	50mm Plastic Waste Pipe 2.4 mm thickness	plastic	0.0396673
	45	Structure	Wall	Load bearing	Stone	600mm thick slate	slate	605.405
	45	Structure	Floor	Load bearing	Insitu Concrete	150 mm thick cast concrete	concrete	69.3
	45	Structure	Roof	Load bearing	Insitu Concrete	150 mm thick cast concrete	concrete	34.65
	45	Skin	Roof	Finish 1	Timber	19 mm thick timber or chipboard	chipboard	1.3167
	46	Skin	Wall	Internal finish	Plaster	13 mm thick lightweight plaster	plaster	2.81081
	46	Skin	Floor	Finish 1	Floor finish	10 mm thick carpet/underlay	carpet/underlay	0.231
	46	Skin	Floor	Intermediate finish 1	Screed	75 mm thick screed	screed	10.395
	46	Skin	Opening	Door	Wooden door	Rationel AURAPLUS / Rationel FORMAPLUS - glazed	timber	0.202749
	46	Skin	Opening	Door	Wooden door	Rationel AURAPLUS / Rationel FORMAPLUS - glazed	glass	0.317279
	46	Skin	Opening	Window	Wooden frame window	Side hung window 3-glass Alu - AFSC	timber	0.305956
	46	Skin	Opening	Window	Wooden frame window	Side hung window 3-glass Alu - AFSC	glass	0.73423
	46	Space	Wall	Finish 1	Plaster	13 mm thick lightweight plaster	plaster	1.4054
	46	Space	Wall	Intermediate finish 1	Timber	6.5 mm thick 35 mm wide timber laths	timber	0.22545
	46	Space	Wall	Non-Load Bearing Structure	Brick	220 mm thick brick	brick	69.3693
	46	Space	Wall	Intermediate support	Timber	140 mm thick studding at 600mm c/c spacing	timber studwork	1.77838
	46	Space	Wall	Intermediate finish 2	Timber	6.5 mm thick 35 mm wide timber laths	timber	0.22545
	46	Space	Wall	Finish 2	Plaster	13 mm thick lightweight plaster	plaster	1.4054
	46	Space	Floor	Finish 1	Floor finish	10 mm thick carpet/underlay	carpet/underlay	0.231
	46	Space	Floor	Intermediate finish 1	Screed	50 mm thick screed	screed	6.93
	46	Space	Floor	Finish 2	Plaster	13 mm thick dense plaster	plaster	1.95195
	46	Space	Opening	Door	Wooden Door	Forza FD60 Flush Solid Core Timber Door	timber	1.13994
	46	Services	Heating	Heat Source	Gas Boiler	20 kW TZERRA Ace-Matic (NL)	steel	0.00821
	46	Services	Heating	Heat Source	Gas Boiler	20 kW TZERRA Ace-Matic (NL)	stainless steel	0.00627
	46	Services	Heating	Heat Source	Gas Boiler	20 kW TZERRA Ace-Matic (NL)	aluminium	0.00189
	46	Services	Heating	Heat Source	Gas Boiler	20 kW TZERRA Ace-Matic (NL)	copper	0.00101
	46	Services	Heating	Heat Source	Gas Boiler	20 kW TZERRA Ace-Matic (NL)	plastic	0.00674
	46	Services	Heating	Emitter	Hot Water Radiator	1kW Thermopanel V4	steel	0.462721
	46	Services	Heating	Emitter	Hot Water Radiator	1kW Thermopanel V4	brass	0.00203742
	46	Services	Heating	Emitter	Hot Water Radiator	1kW Thermopanel V4	plastic	0.00249018
	46	Services	Heating	Storage	Storage tank	606L HRI 600	steel	0.04476
	46	Services	Heating	Storage	Storage tank	606L HRI 600	stainless steel	0.03076
	46	Services	Heating	Storage	Storage tank	606L HRI 600	plastic	0.002796
	46	Services	Heating	Transportation	Heating pipe	22mm Plastic Pipe 2mm thickness	plastic	0.00670824
	46	Services	Electrical	Wiring	Electrical cable	1.5mm2 twin and earth cable	copper	0.00557172
	46	Services	Electrical	Wiring	Electrical cable	1.5mm2 twin and earth cable	plastic	0.00399168
	46	Services	Plumbing	Transportation	Plumbing pipe	32mm Plastic Waste Pipe 1.8 mm thickness	plastic	0.0188773
	46	Structure	Wall	Load bearing	Brick	105 mm thick brick	brick	66.2161
	46	Structure	Floor	Load bearing	Timber	225 mm thick timber joists at 600mm c/c spacing	timber	3.66424
	46	Structure	Roof	Load bearing	Insitu Concrete	80 mm thick concrete	concrete	18.48
	46	Skin	Roof	Finish 1	Timber	19 mm thick timber or chipboard	chipboard	1.3167
	47	Skin	Wall	Internal finish	Plaster	13 mm thick dense plaster	plaster	6.09008
	47	Skin	Floor	Finish 1	Floor finish	10 mm thick carpet/underlay	carpet/underlay	0.231
	47	Skin	Opening	Door	Steel door	Steel doors S30/Y30 - S63/Y63	timber	0.00545738
	47	Skin	Opening	Window	Wooden frame window	Side hung window 3-glass Alu - AFSC	timber	0.305956
	47	Skin	Opening	Window	Wooden frame window	Side hung window 3-glass Alu - AFSC	glass	0.73423
	47	Space	Wall	Finish 1	Plaster	13 mm thick lightweight plaster	plaster	1.4054
	47	Space	Wall	Intermediate finish 1	Timber	6.5 mm thick 35 mm wide timber laths	timber	0.22545
	47	Space	Wall	Non-Load Bearing Structure	Brick	215 mm thick brick	brick	67.7927
	47	Space	Wall	Intermediate support	Timber	95 mm thick studding at 600mm c/c spacing	timber studwork	1.20676
	47	Space	Wall	Intermediate finish 2	Timber	6.5 mm thick 35 mm wide timber laths	timber	0.22545
	47	Space	Wall	Finish 2	Plaster	13 mm thick dense plaster	plaster	3.04504
	47	Space	Floor	Finish 1	Floor finish	10 mm thick carpet/underlay	carpet/underlay	0.231
	47	Space	Floor	Intermediate finish 1	Timber	19 mm thick timber or chipboard	chipboard	1.3167
	47	Space	Floor	Finish 2	Plaster	13 mm thick lightweight plaster	plaster	0.9009
	47	Space	Opening	Door	Wooden Door	Forza FD60 Flush Solid Core Timber Door	timber	1.13994
	47	Services	Heating	Heat Source	Gas Boiler	25kW ecoTEC plus VUW 25/32CS/1-5 (N-FR)	steel	0.01556
	47	Services	Heating	Heat Source	Gas Boiler	25kW ecoTEC plus VUW 25/32CS/1-5 (N-FR)	stainless steel	0.0094
	47	Services	Heating	Heat Source	Gas Boiler	25kW ecoTEC plus VUW 25/32CS/1-5 (N-FR)	aluminium	0.00245
	47	Services	Heating	Heat Source	Gas Boiler	25kW ecoTEC plus VUW 25/32CS/1-5 (N-FR)	copper	0.00275
	47	Services	Heating	Heat Source	Gas Boiler	25kW ecoTEC plus VUW 25/32CS/1-5 (N-FR)	brass	0.00269
	47	Services	Heating	Heat Source	Gas Boiler	25kW ecoTEC plus VUW 25/32CS/1-5 (N-FR)	plastic	0.00355
	47	Services	Heating	Emitter	Hot Water Radiator	1kW Thermopanel V4	steel	0.462721
	47	Services	Heating	Emitter	Hot Water Radiator	1kW Thermopanel V4	brass	0.00203742
	47	Services	Heating	Emitter	Hot Water Radiator	1kW Thermopanel V4	plastic	0.00249018
	47	Services	Heating	Storage	Storage tank	300L ACV SMART E	steel	0.01442
	47	Services	Heating	Storage	Storage tank	300L ACV SMART E	stainless steel	0.00752
	47	Services	Heating	Storage	Storage tank	300L ACV SMART E	plastic	0.007012
	47	Services	Heating	Transportation	Heating pipe	22mm Copper Pipe 0.9mm thickness	copper	0.0404019
	47	Services	Electrical	Wiring	Electrical cable	1.5mm2 twin and earth cable	copper	0.00557172
	47	Services	Electrical	Wiring	Electrical cable	1.5mm2 twin and earth cable	plastic	0.00399168
	47	Services	Plumbing	Transportation	Plumbing pipe	110mm Plastic Soil Pipe 4.2 mm thickness	plastic	0.154428
	47	Skin	Floor	Intermediate finish 1	Timber	19 mm thick timber or chipboard	chipboard	1.3167
	47	Structure	Wall	Load bearing	Stone	600mm thick slate	slate	605.405
	47	Structure	Floor	Load bearing	Insitu Concrete	65 mm thick cast concrete	concrete	30.03
	47	Structure	Roof	Load bearing	Insitu Concrete	80 mm thick concrete	concrete	18.48
	47	Skin	Roof	Finish 1	Timber	19 mm thick timber or chipboard	chipboard	1.3167
	48	Skin	Wall	Internal finish	Plaster	13 mm thick lightweight plaster	plaster	2.81081
	48	Skin	Floor	Finish 1	Floor finish	10 mm thick carpet/underlay	carpet/underlay	0.231
	48	Skin	Floor	Intermediate finish 1	Screed	50 mm thick screed	screed	6.93
	48	Skin	Opening	Door	Wooden door	OPUS Wooden Front Doors	timber	0.447505
	48	Skin	Opening	Window	Metal frame window	Glass fiber fixed window OK	glass	0.580432
	48	Space	Wall	Finish 1	Plaster	13 mm thick lightweight plaster	plaster	1.4054
	48	Space	Wall	Intermediate finish 1	Timber	6.5 mm thick 35 mm wide timber laths	timber	0.22545
	48	Space	Wall	Non-Load Bearing Structure	Brick	105 mm thick brick	brick	33.1081
	48	Space	Wall	Intermediate support	Timber	140 mm thick studding at 600mm c/c spacing	timber studwork	1.77838
	48	Space	Wall	Intermediate finish 2	Timber	6.5 mm thick 35 mm wide timber laths	timber	0.22545
	48	Space	Wall	Finish 2	Plaster	13 mm thick dense plaster	plaster	3.04504
	48	Space	Floor	Finish 1	Floor finish	10 mm thick carpet/underlay	carpet/underlay	0.231
	48	Space	Floor	Intermediate finish 1	Timber	19 mm thick timber or chipboard	chipboard	1.3167
	48	Space	Floor	Finish 2	Plaster	13 mm thick lightweight plaster	plaster	0.9009
	48	Space	Opening	Door	Wooden Door	Forza FD60 Flush Solid Core Timber Door	timber	1.13994
	48	Services	Heating	Heat Source	Gas Boiler	20 kW TZERRA Ace-Matic (NL)	steel	0.00821
	48	Services	Heating	Heat Source	Gas Boiler	20 kW TZERRA Ace-Matic (NL)	stainless steel	0.00627
	48	Services	Heating	Heat Source	Gas Boiler	20 kW TZERRA Ace-Matic (NL)	aluminium	0.00189
	48	Services	Heating	Heat Source	Gas Boiler	20 kW TZERRA Ace-Matic (NL)	copper	0.00101
	48	Services	Heating	Heat Source	Gas Boiler	20 kW TZERRA Ace-Matic (NL)	plastic	0.00674
	48	Services	Heating	Emitter	Hot Water Radiator	1kW Thermopanel V4	steel	0.462721
	48	Services	Heating	Emitter	Hot Water Radiator	1kW Thermopanel V4	brass	0.00203742
	48	Services	Heating	Emitter	Hot Water Radiator	1kW Thermopanel V4	plastic	0.00249018
	48	Services	Heating	Storage	Storage tank	606L HRI 600	steel	0.04476
	48	Services	Heating	Storage	Storage tank	606L HRI 600	stainless steel	0.03076
	48	Services	Heating	Storage	Storage tank	606L HRI 600	plastic	0.002796
	48	Services	Heating	Transportation	Heating pipe	22mm Plastic Pipe 2mm thickness	plastic	0.00670824
	48	Services	Electrical	Wiring	Electrical cable	2.5mm2 twin and earth cable	copper	0.00823284
	48	Services	Electrical	Wiring	Electrical cable	2.5mm2 twin and earth cable	plastic	0.00590436
	48	Services	Plumbing	Transportation	Plumbing pipe	40mm Plastic Waste Pipe 1.9 mm thickness	plastic	0.0251143
	48	Structure	Wall	Load bearing	Stone	600mm thick limestone	limestone	475.675
	48	Structure	Floor	Load bearing	Insitu Concrete	150 mm thick cast concrete	concrete	69.3
	48	Structure	Roof	Load bearing	Insitu Concrete	65 mm thick cast concrete	concrete	15.015
	48	Skin	Roof	Finish 1	Timber	19 mm thick timber or chipboard	chipboard	1.3167
	49	Skin	Wall	Internal finish	Plaster	13 mm thick lightweight plaster	plaster	2.81081
	49	Skin	Floor	Finish 1	Floor finish	10 mm thick carpet/underlay	carpet/underlay	0.231
	49	Skin	Floor	Intermediate finish 1	Screed	50 mm thick screed	screed	6.93
	49	Skin	Opening	Door	Steel door	Steel doors S30/Y30 - S63/Y63	timber	0.00545738
	49	Skin	Opening	Window	Wooden frame window	Side hung window 3-glass Alu - AFSC	timber	0.305956
	49	Skin	Opening	Window	Wooden frame window	Side hung window 3-glass Alu - AFSC	glass	0.73423
	49	Space	Wall	Finish 1	Plaster	13 mm thick dense plaster	plaster	3.04504
	49	Space	Wall	Intermediate finish 1	Timber	6.5 mm thick 35 mm wide timber laths	timber	0.22545
	49	Space	Wall	Non-Load Bearing Structure	Brick	220 mm thick brick	brick	69.3693
	49	Space	Wall	Intermediate support	Timber	95 mm thick studding at 600mm c/c spacing	timber studwork	1.20676
	49	Space	Wall	Intermediate finish 2	Timber	6.5 mm thick 35 mm wide timber laths	timber	0.22545
	49	Space	Wall	Finish 2	Plaster	13 mm thick dense plaster	plaster	3.04504
	49	Space	Floor	Finish 1	Floor finish	10 mm thick carpet/underlay	carpet/underlay	0.231
	49	Space	Floor	Intermediate finish 1	Screed	75 mm thick screed	screed	10.395
	49	Space	Floor	Finish 2	Plaster	13 mm thick lightweight plaster	plaster	0.9009
	49	Space	Opening	Door	Wooden Door	Forza FD60 Flush Solid Core Timber Door	timber	1.13994
	49	Services	Heating	Heat Source	Gas Boiler	20kW AVANTA ACE (export)	steel	0.01187
	49	Services	Heating	Heat Source	Gas Boiler	20kW AVANTA ACE (export)	stainless steel	0.00661
	49	Services	Heating	Heat Source	Gas Boiler	20kW AVANTA ACE (export)	aluminium	0.00184
	49	Services	Heating	Heat Source	Gas Boiler	20kW AVANTA ACE (export)	copper	0.00101
	49	Services	Heating	Heat Source	Gas Boiler	20kW AVANTA ACE (export)	plastic	0.00695
	49	Services	Heating	Emitter	Hot Water Radiator	1kW Thermopanel V4	steel	0.462721
	49	Services	Heating	Emitter	Hot Water Radiator	1kW Thermopanel V4	brass	0.00203742
	49	Services	Heating	Emitter	Hot Water Radiator	1kW Thermopanel V4	plastic	0.00249018
	49	Services	Heating	Storage	Storage tank	300L ACV SMART E	steel	0.01442
	49	Services	Heating	Storage	Storage tank	300L ACV SMART E	stainless steel	0.00752
	49	Services	Heating	Storage	Storage tank	300L ACV SMART E	plastic	0.007012
	49	Services	Heating	Transportation	Heating pipe	22mm Plastic Pipe 2mm thickness	plastic	0.00670824
	49	Services	Electrical	Wiring	Electrical cable	2.5mm2 twin and earth cable	copper	0.00823284
	49	Services	Electrical	Wiring	Electrical cable	2.5mm2 twin and earth cable	plastic	0.00590436
	49	Services	Plumbing	Transportation	Plumbing pipe	32mm Plastic Waste Pipe 1.8 mm thickness	plastic	0.0188773
	49	Structure	Wall	Load bearing	Brick	105 mm thick brick	brick	66.2161
	49	Structure	Floor	Load bearing	Timber	225 mm thick timber joists at 600mm c/c spacing	timber	3.66424
	49	Structure	Roof	Load bearing	Timber	35 mm thick fink truss at 600mm c/c spacing	timber	1.32132
	49	Skin	Roof	Finish 1	Timber	19 mm thick timber or chipboard	chipboard	1.3167
	50	Skin	Wall	Internal finish	Plaster	13 mm thick lightweight plaster	plaster	2.81081
	50	Skin	Floor	Finish 1	Floor finish	10 mm thick carpet/underlay	carpet/underlay	0.231
	50	Skin	Floor	Intermediate finish 1	Screed	75 mm thick screed	screed	10.395
	50	Skin	Opening	Door	Steel door	Steel doors S30/Y30 - S63/Y63	timber	0.00545738
	50	Skin	Opening	Window	Wooden frame window	VELFAC Classic woodÂ–Top-guided window	timber	0.343012
	50	Skin	Opening	Window	Wooden frame window	VELFAC Classic woodÂ–Top-guided window	glass	0.723736
	50	Space	Wall	Finish 1	Plaster	13 mm thick dense plaster	plaster	3.04504
	50	Space	Wall	Intermediate finish 1	Timber	6.5 mm thick 35 mm wide timber laths	timber	0.22545
	50	Space	Wall	Non-Load Bearing Structure	Brick	105 mm thick brick	brick	33.1081
	50	Space	Wall	Intermediate support	Timber	95 mm thick studding at 600mm c/c spacing	timber studwork	1.20676
	50	Space	Wall	Intermediate finish 2	Timber	6.5 mm thick 35 mm wide timber laths	timber	0.22545
	50	Space	Wall	Finish 2	Plaster	13 mm thick lightweight plaster	plaster	1.4054
	50	Space	Floor	Finish 1	Floor finish	10 mm thick carpet/underlay	carpet/underlay	0.231
	50	Space	Floor	Intermediate finish 1	Screed	75 mm thick screed	screed	10.395
	50	Space	Floor	Finish 2	Plaster	13 mm thick dense plaster	plaster	1.95195
	50	Space	Opening	Door	Wooden Door	Forza FD60 Flush Solid Core Timber Door	timber	1.13994
	50	Services	Heating	Heat Source	Gas Boiler	25kW ThermaFast Condens 31	steel	0.0167
	50	Services	Heating	Heat Source	Gas Boiler	25kW ThermaFast Condens 31	aluminium	0.00249
	50	Services	Heating	Heat Source	Gas Boiler	25kW ThermaFast Condens 31	copper	0.00365
	50	Services	Heating	Heat Source	Gas Boiler	25kW ThermaFast Condens 31	brass	0.00288
	50	Services	Heating	Heat Source	Gas Boiler	25kW ThermaFast Condens 31	plastic	0.00237
	50	Services	Heating	Emitter	Hot Water Radiator	1kW Fassane Pack double Ã ailettes	steel	0.707211
	50	Services	Heating	Emitter	Hot Water Radiator	1kW Fassane Pack double Ã ailettes	brass	0.0022638
	50	Services	Heating	Emitter	Hot Water Radiator	1kW Fassane Pack double Ã ailettes	plastic	0.00543312
	50	Services	Heating	Storage	Storage tank	606L HRI 600	steel	0.04476
	50	Services	Heating	Storage	Storage tank	606L HRI 600	stainless steel	0.03076
	50	Services	Heating	Storage	Storage tank	606L HRI 600	plastic	0.002796
	50	Services	Heating	Transportation	Heating pipe	22mm Copper Pipe 0.9mm thickness	copper	0.0404019
	50	Services	Electrical	Wiring	Electrical cable	1.5mm2 twin and earth cable	copper	0.00557172
	50	Services	Electrical	Wiring	Electrical cable	1.5mm2 twin and earth cable	plastic	0.00399168
	50	Services	Plumbing	Transportation	Plumbing pipe	50mm Plastic Waste Pipe 2.4 mm thickness	plastic	0.0396673
	50	Structure	Wall	Load bearing	Brick	220 mm thick brick	brick	138.739
	50	Structure	Floor	Load bearing	Timber	100 mm thick timber joists at 600mm c/c spacing	timber	1.62855
	50	Structure	Roof	Load bearing	Insitu Concrete	80 mm thick concrete	concrete	18.48
	50	Skin	Roof	Finish 1	Timber	19 mm thick timber or chipboard	chipboard	1.3167
	51	Skin	Wall	Internal finish	Plaster	13 mm thick dense plaster	plaster	6.09008
	51	Skin	Floor	Finish 1	Floor finish	10 mm thick carpet/underlay	carpet/underlay	0.231
	51	Skin	Floor	Intermediate finish 1	Screed	75 mm thick screed	screed	10.395
	51	Skin	Opening	Door	Steel door	Steel doors S30/Y30 - S63/Y63	timber	0.00545738
	51	Skin	Opening	Window	Metal frame window	forster unico Windows	glass	1.62547
	51	Space	Wall	Finish 1	Plaster	13 mm thick dense plaster	plaster	3.04504
	51	Space	Wall	Intermediate finish 1	Timber	6.5 mm thick 35 mm wide timber laths	timber	0.22545
	51	Space	Wall	Non-Load Bearing Structure	Brick	220 mm thick brick	brick	69.3693
	51	Space	Wall	Intermediate support	Timber	95 mm thick studding at 600mm c/c spacing	timber studwork	1.20676
	51	Space	Wall	Intermediate finish 2	Timber	6.5 mm thick 35 mm wide timber laths	timber	0.22545
	51	Space	Wall	Finish 2	Plaster	13 mm thick dense plaster	plaster	3.04504
	51	Space	Floor	Finish 1	Floor finish	10 mm thick carpet/underlay	carpet/underlay	0.231
	51	Space	Floor	Intermediate finish 1	Timber	19 mm thick timber or chipboard	chipboard	1.3167
	51	Space	Floor	Finish 2	Plaster	13 mm thick dense plaster	plaster	1.95195
	51	Space	Opening	Door	Wooden Door	Forza FD60 Flush Solid Core Timber Door	timber	1.13994
	51	Services	Heating	Heat Source	Gas Boiler	25kW ecoTEC plus systÃ¨me VU 25 CS/1-5 (N-FR)	steel	0.01545
	51	Services	Heating	Heat Source	Gas Boiler	25kW ecoTEC plus systÃ¨me VU 25 CS/1-5 (N-FR)	stainless steel	0.00941
	51	Services	Heating	Heat Source	Gas Boiler	25kW ecoTEC plus systÃ¨me VU 25 CS/1-5 (N-FR)	aluminium	0.00247
	51	Services	Heating	Heat Source	Gas Boiler	25kW ecoTEC plus systÃ¨me VU 25 CS/1-5 (N-FR)	copper	0.00234
	51	Services	Heating	Heat Source	Gas Boiler	25kW ecoTEC plus systÃ¨me VU 25 CS/1-5 (N-FR)	brass	0.00229
	51	Services	Heating	Heat Source	Gas Boiler	25kW ecoTEC plus systÃ¨me VU 25 CS/1-5 (N-FR)	plastic	0.00383
	51	Services	Heating	Emitter	Hot Water Radiator	1kW Classic Hot Water Radiator Range	steel	0.456382
	51	Services	Heating	Storage	Storage tank	300L ACV SMART E	steel	0.01442
	51	Services	Heating	Storage	Storage tank	300L ACV SMART E	stainless steel	0.00752
	51	Services	Heating	Storage	Storage tank	300L ACV SMART E	plastic	0.007012
	51	Services	Heating	Transportation	Heating pipe	15mm Copper Pipe 0.7mm thickness	copper	0.0213444
	51	Services	Electrical	Wiring	Electrical cable	2.5mm2 twin and earth cable	copper	0.00823284
	51	Services	Electrical	Wiring	Electrical cable	2.5mm2 twin and earth cable	plastic	0.00590436
	51	Services	Plumbing	Transportation	Plumbing pipe	40mm Plastic Waste Pipe 1.9 mm thickness	plastic	0.0251143
	51	Structure	Wall	Load bearing	Stone	600mm thick limestone	limestone	475.675
	51	Structure	Floor	Load bearing	Insitu Concrete	65 mm thick cast concrete	concrete	30.03
	51	Structure	Roof	Load bearing	Timber	100 mm thick timber rafters at 600mm c/c spacing	timber	0.814275
	51	Skin	Roof	Finish 1	Timber	19 mm thick timber or chipboard	chipboard	1.3167
	52	Skin	Wall	Internal finish	Plaster	13 mm thick lightweight plaster	plaster	2.81081
	52	Skin	Floor	Finish 1	Floor finish	10 mm thick carpet/underlay	carpet/underlay	0.231
	52	Skin	Floor	Intermediate finish 1	Screed	50 mm thick screed	screed	6.93
	52	Skin	Opening	Door	Steel door	Steel doors S30/Y30 - S63/Y63	timber	0.00545738
	52	Skin	Opening	Window	Wooden frame window	VELFAC Classic woodÂ–Top-guided window	timber	0.343012
	52	Skin	Opening	Window	Wooden frame window	VELFAC Classic woodÂ–Top-guided window	glass	0.723736
	52	Space	Wall	Finish 1	Plaster	13 mm thick lightweight plaster	plaster	1.4054
	52	Space	Wall	Intermediate finish 1	Timber	6.5 mm thick 35 mm wide timber laths	timber	0.22545
	52	Space	Wall	Non-Load Bearing Structure	Brick	105 mm thick brick	brick	33.1081
	52	Space	Wall	Intermediate support	Timber	95 mm thick studding at 600mm c/c spacing	timber studwork	1.20676
	52	Space	Wall	Intermediate finish 2	Timber	6.5 mm thick 35 mm wide timber laths	timber	0.22545
	52	Space	Wall	Finish 2	Plaster	13 mm thick lightweight plaster	plaster	1.4054
	52	Space	Floor	Finish 1	Floor finish	10 mm thick carpet/underlay	carpet/underlay	0.231
	52	Space	Floor	Intermediate finish 1	Timber	19 mm thick timber or chipboard	chipboard	1.3167
	52	Space	Floor	Finish 2	Plaster	13 mm thick lightweight plaster	plaster	0.9009
	52	Space	Opening	Door	Wooden Door	Forza FD60 Flush Solid Core Timber Door	timber	1.13994
	52	Services	Heating	Heat Source	Gas Boiler	20kW AVANTA ACE (export)	steel	0.01187
	52	Services	Heating	Heat Source	Gas Boiler	20kW AVANTA ACE (export)	stainless steel	0.00661
	52	Services	Heating	Heat Source	Gas Boiler	20kW AVANTA ACE (export)	aluminium	0.00184
	52	Services	Heating	Heat Source	Gas Boiler	20kW AVANTA ACE (export)	copper	0.00101
	52	Services	Heating	Heat Source	Gas Boiler	20kW AVANTA ACE (export)	plastic	0.00695
	52	Services	Heating	Emitter	Hot Water Radiator	1kW Classic Hot Water Radiator Range	steel	0.456382
	52	Services	Heating	Storage	Storage tank	606L HRI 600	steel	0.04476
	52	Services	Heating	Storage	Storage tank	606L HRI 600	stainless steel	0.03076
	52	Services	Heating	Storage	Storage tank	606L HRI 600	plastic	0.002796
	52	Services	Heating	Transportation	Heating pipe	15mm Plastic Pipe 1.5mm thickness	plastic	0.00647955
	52	Services	Electrical	Wiring	Electrical cable	1.5mm2 twin and earth cable	copper	0.00557172
	52	Services	Electrical	Wiring	Electrical cable	1.5mm2 twin and earth cable	plastic	0.00399168
	52	Services	Plumbing	Transportation	Plumbing pipe	40mm Plastic Waste Pipe 1.9 mm thickness	plastic	0.0251143
	52	Structure	Wall	Load bearing	Brick	215 mm thick brick	brick	135.585
	52	Structure	Floor	Load bearing	Timber	225 mm thick timber joists at 600mm c/c spacing	timber	3.66424
	52	Structure	Roof	Load bearing	Insitu Concrete	80 mm thick concrete	concrete	18.48
	52	Skin	Roof	Finish 1	Timber	19 mm thick timber or chipboard	chipboard	1.3167
	53	Skin	Wall	Internal finish	Plaster	13 mm thick lightweight plaster	plaster	2.81081
	53	Skin	Floor	Finish 1	Floor finish	10 mm thick carpet/underlay	carpet/underlay	0.231
	53	Skin	Floor	Intermediate finish 1	Screed	50 mm thick screed	screed	6.93
	53	Skin	Opening	Door	Wooden door	Rationel AURA / Rationel FORMA	timber	0.212035
	53	Skin	Opening	Door	Wooden door	Rationel AURA / Rationel FORMA	glass	0.318826
	53	Skin	Opening	Window	Composite frame window	SERIE STH ECO Â– WINDOW SYSTEM	timber	0.178721
	53	Skin	Opening	Window	Composite frame window	SERIE STH ECO Â– WINDOW SYSTEM	glass	0.762104
	53	Space	Wall	Finish 1	Plaster	13 mm thick dense plaster	plaster	3.04504
	53	Space	Wall	Intermediate finish 1	Timber	6.5 mm thick 35 mm wide timber laths	timber	0.22545
	53	Space	Wall	Non-Load Bearing Structure	Brick	220 mm thick brick	brick	69.3693
	53	Space	Wall	Intermediate support	Timber	25 mm thick timber battens at 600mm c/c spacing	timber studwork	0.317567
	53	Space	Wall	Intermediate finish 2	Timber	6.5 mm thick 35 mm wide timber laths	timber	0.22545
	53	Space	Wall	Finish 2	Plaster	13 mm thick lightweight plaster	plaster	1.4054
	53	Space	Floor	Finish 1	Floor finish	10 mm thick carpet/underlay	carpet/underlay	0.231
	53	Space	Floor	Intermediate finish 1	Timber	19 mm thick timber or chipboard	chipboard	1.3167
	53	Space	Floor	Finish 2	Plaster	13 mm thick lightweight plaster	plaster	0.9009
	53	Space	Opening	Door	Wooden Door	Forza FD60 Flush Solid Core Timber Door	timber	1.13994
	53	Services	Heating	Heat Source	Gas Boiler	24kW TZERRA Ace-Matic (DE)	steel	0.01266
	53	Services	Heating	Heat Source	Gas Boiler	24kW TZERRA Ace-Matic (DE)	stainless steel	0.00644
	53	Services	Heating	Heat Source	Gas Boiler	24kW TZERRA Ace-Matic (DE)	aluminium	0.00191
	53	Services	Heating	Heat Source	Gas Boiler	24kW TZERRA Ace-Matic (DE)	copper	0.00101
	53	Services	Heating	Heat Source	Gas Boiler	24kW TZERRA Ace-Matic (DE)	plastic	0.00733
	53	Services	Heating	Emitter	Hot Water Radiator	1kW Therma Hot Water Radiator Range	steel	0.567308
	53	Services	Heating	Storage	Storage tank	300L ACV SMART E	steel	0.01442
	53	Services	Heating	Storage	Storage tank	300L ACV SMART E	stainless steel	0.00752
	53	Services	Heating	Storage	Storage tank	300L ACV SMART E	plastic	0.007012
	53	Services	Heating	Transportation	Heating pipe	15mm Copper Pipe 0.7mm thickness	copper	0.0213444
	53	Services	Electrical	Wiring	Electrical cable	1.5mm2 twin and earth cable	copper	0.00557172
	53	Services	Electrical	Wiring	Electrical cable	1.5mm2 twin and earth cable	plastic	0.00399168
	53	Services	Plumbing	Transportation	Plumbing pipe	32mm Plastic Waste Pipe 1.8 mm thickness	plastic	0.0188773
	53	Structure	Wall	Load bearing	Brick	220 mm thick brick	brick	138.739
	53	Structure	Floor	Load bearing	Timber	200 mm thick timber joists at 600mm c/c spacing	timber	3.2571
	53	Structure	Roof	Load bearing	Timber	35 mm thick fink truss at 600mm c/c spacing	timber	1.32132
	53	Skin	Roof	Finish 1	Timber	19 mm thick timber or chipboard	chipboard	1.3167
	54	Skin	Wall	Internal finish	Plaster	13 mm thick dense plaster	plaster	6.09008
	54	Skin	Floor	Finish 1	Floor finish	10 mm thick carpet/underlay	carpet/underlay	0.231
	54	Skin	Opening	Door	Steel door	Steel doors S30/Y30 - S63/Y63	timber	0.00545738
	54	Skin	Opening	Window	Wooden frame window	Side hung window 3-glass Alu - AFSC	timber	0.305956
	54	Skin	Opening	Window	Wooden frame window	Side hung window 3-glass Alu - AFSC	glass	0.73423
	54	Space	Wall	Finish 1	Plaster	13 mm thick lightweight plaster	plaster	1.4054
	54	Space	Wall	Intermediate finish 1	Timber	6.5 mm thick 35 mm wide timber laths	timber	0.22545
	54	Space	Wall	Non-Load Bearing Structure	Brick	220 mm thick brick	brick	69.3693
	54	Space	Wall	Intermediate support	Timber	140 mm thick studding at 600mm c/c spacing	timber studwork	1.77838
	54	Space	Wall	Intermediate finish 2	Timber	6.5 mm thick 35 mm wide timber laths	timber	0.22545
	54	Space	Wall	Finish 2	Plaster	13 mm thick dense plaster	plaster	3.04504
	54	Space	Floor	Finish 1	Floor finish	10 mm thick carpet/underlay	carpet/underlay	0.231
	54	Space	Floor	Intermediate finish 1	Screed	50 mm thick screed	screed	6.93
	54	Space	Floor	Finish 2	Plaster	13 mm thick lightweight plaster	plaster	0.9009
	54	Space	Opening	Door	Wooden Door	Forza FD60 Flush Solid Core Timber Door	timber	1.13994
	54	Services	Heating	Heat Source	Gas Boiler	24kW Mixed Wall mounted gas condensing boiler - MCR-S	steel	0.01081
	54	Services	Heating	Heat Source	Gas Boiler	24kW Mixed Wall mounted gas condensing boiler - MCR-S	stainless steel	0.0076
	54	Services	Heating	Heat Source	Gas Boiler	24kW Mixed Wall mounted gas condensing boiler - MCR-S	aluminium	0.00168
	54	Services	Heating	Heat Source	Gas Boiler	24kW Mixed Wall mounted gas condensing boiler - MCR-S	plastic	0.00667
	54	Services	Heating	Emitter	Hot Water Radiator	1kW Classic Hot Water Radiator Range	steel	0.456382
	54	Services	Heating	Storage	Storage tank	300L ACV SMART E	steel	0.01442
	54	Services	Heating	Storage	Storage tank	300L ACV SMART E	stainless steel	0.00752
	54	Services	Heating	Storage	Storage tank	300L ACV SMART E	plastic	0.007012
	54	Services	Heating	Transportation	Heating pipe	15mm Copper Pipe 0.7mm thickness	copper	0.0213444
	54	Services	Electrical	Wiring	Electrical cable	2.5mm2 twin and earth cable	copper	0.00823284
	54	Services	Electrical	Wiring	Electrical cable	2.5mm2 twin and earth cable	plastic	0.00590436
	54	Services	Plumbing	Transportation	Plumbing pipe	50mm Plastic Waste Pipe 2.4 mm thickness	plastic	0.0396673
	54	Skin	Floor	Intermediate finish 1	Timber	19 mm thick timber or chipboard	chipboard	1.3167
	54	Structure	Wall	Load bearing	Brick	215 mm thick brick	brick	135.585
	54	Structure	Floor	Load bearing	Insitu Concrete	65 mm thick cast concrete	concrete	30.03
	54	Structure	Roof	Load bearing	Insitu Concrete	80 mm thick concrete	concrete	18.48
	54	Skin	Roof	Finish 1	Timber	19 mm thick timber or chipboard	chipboard	1.3167
	55	Skin	Wall	Internal finish	Plaster	13 mm thick lightweight plaster	plaster	2.81081
	55	Skin	Floor	Finish 1	Floor finish	10 mm thick carpet/underlay	carpet/underlay	0.231
	55	Skin	Opening	Door	Wooden door	OPUS Wooden Front Doors	timber	0.447505
	55	Skin	Opening	Window	Metal frame window	hinged windows, series ITESAL 45, coated	glass	0.406126
	55	Space	Wall	Finish 1	Plaster	13 mm thick dense plaster	plaster	3.04504
	55	Space	Wall	Intermediate finish 1	Timber	6.5 mm thick 35 mm wide timber laths	timber	0.22545
	55	Space	Wall	Non-Load Bearing Structure	Brick	105 mm thick brick	brick	33.1081
	55	Space	Wall	Intermediate support	Timber	95 mm thick studding at 600mm c/c spacing	timber studwork	1.20676
	55	Space	Wall	Intermediate finish 2	Timber	6.5 mm thick 35 mm wide timber laths	timber	0.22545
	55	Space	Wall	Finish 2	Plaster	13 mm thick dense plaster	plaster	3.04504
	55	Space	Floor	Finish 1	Floor finish	10 mm thick carpet/underlay	carpet/underlay	0.231
	55	Space	Floor	Intermediate finish 1	Timber	19 mm thick timber or chipboard	chipboard	1.3167
	55	Space	Floor	Finish 2	Plaster	13 mm thick lightweight plaster	plaster	0.9009
	55	Space	Opening	Door	Wooden Door	Forza FD60 Flush Solid Core Timber Door	timber	1.13994
	55	Services	Heating	Heat Source	Gas Boiler	12.25kW Condensing Boiler Alteas one + Net 24	steel	0.01852
	55	Services	Heating	Heat Source	Gas Boiler	12.25kW Condensing Boiler Alteas one + Net 24	aluminium	0.00173
	55	Services	Heating	Heat Source	Gas Boiler	12.25kW Condensing Boiler Alteas one + Net 24	copper	0.00193
	55	Services	Heating	Heat Source	Gas Boiler	12.25kW Condensing Boiler Alteas one + Net 24	glass	0.00278
	55	Services	Heating	Heat Source	Gas Boiler	12.25kW Condensing Boiler Alteas one + Net 24	plastic	0.0041
	55	Services	Heating	Emitter	Hot Water Radiator	1kW Galant Hot Water Radiator Range	steel	0.678234
	55	Services	Heating	Storage	Storage tank	300L ACV SMART E	steel	0.01442
	55	Services	Heating	Storage	Storage tank	300L ACV SMART E	stainless steel	0.00752
	55	Services	Heating	Storage	Storage tank	300L ACV SMART E	plastic	0.007012
	55	Services	Heating	Transportation	Heating pipe	22mm Plastic Pipe 2mm thickness	plastic	0.00670824
	55	Services	Electrical	Wiring	Electrical cable	2.5mm2 twin and earth cable	copper	0.00823284
	55	Services	Electrical	Wiring	Electrical cable	2.5mm2 twin and earth cable	plastic	0.00590436
	55	Services	Plumbing	Transportation	Plumbing pipe	50mm Plastic Waste Pipe 2.4 mm thickness	plastic	0.0396673
	55	Skin	Floor	Intermediate finish 1	Timber	19 mm thick timber or chipboard	chipboard	1.3167
	55	Structure	Wall	Load bearing	Brick	215 mm thick brick	brick	135.585
	55	Structure	Floor	Load bearing	Timber	100 mm thick timber joists at 600mm c/c spacing	timber	1.62855
	55	Structure	Roof	Load bearing	Insitu Concrete	65 mm thick cast concrete	concrete	15.015
	55	Skin	Roof	Finish 1	Timber	19 mm thick timber or chipboard	chipboard	1.3167
	56	Skin	Wall	Internal finish	Plaster	13 mm thick lightweight plaster	plaster	2.81081
	56	Skin	Floor	Finish 1	Floor finish	10 mm thick carpet/underlay	carpet/underlay	0.231
	56	Skin	Floor	Intermediate finish 1	Screed	75 mm thick screed	screed	10.395
	56	Skin	Opening	Door	Steel door	Steel doors S30/Y30 - S63/Y63	timber	0.00545738
	56	Skin	Opening	Window	Metal frame window	Glass fiber fixed window OK	glass	0.580432
	56	Space	Wall	Finish 1	Plaster	13 mm thick lightweight plaster	plaster	1.4054
	56	Space	Wall	Intermediate finish 1	Timber	6.5 mm thick 35 mm wide timber laths	timber	0.22545
	56	Space	Wall	Non-Load Bearing Structure	Brick	215 mm thick brick	brick	67.7927
	56	Space	Wall	Intermediate support	Timber	95 mm thick studding at 600mm c/c spacing	timber studwork	1.20676
	56	Space	Wall	Intermediate finish 2	Timber	6.5 mm thick 35 mm wide timber laths	timber	0.22545
	56	Space	Wall	Finish 2	Plaster	13 mm thick lightweight plaster	plaster	1.4054
	56	Space	Floor	Finish 1	Floor finish	10 mm thick carpet/underlay	carpet/underlay	0.231
	56	Space	Floor	Intermediate finish 1	Timber	19 mm thick timber or chipboard	chipboard	1.3167
	56	Space	Floor	Finish 2	Plaster	13 mm thick lightweight plaster	plaster	0.9009
	56	Space	Opening	Door	Wooden Door	Forza FD60 Flush Solid Core Timber Door	timber	1.13994
	56	Services	Heating	Heat Source	Gas Boiler	25kW ecoTEC plus VUW 25/32CS/1-5 (N-FR)	steel	0.01556
	56	Services	Heating	Heat Source	Gas Boiler	25kW ecoTEC plus VUW 25/32CS/1-5 (N-FR)	stainless steel	0.0094
	56	Services	Heating	Heat Source	Gas Boiler	25kW ecoTEC plus VUW 25/32CS/1-5 (N-FR)	aluminium	0.00245
	56	Services	Heating	Heat Source	Gas Boiler	25kW ecoTEC plus VUW 25/32CS/1-5 (N-FR)	copper	0.00275
	56	Services	Heating	Heat Source	Gas Boiler	25kW ecoTEC plus VUW 25/32CS/1-5 (N-FR)	brass	0.00269
	56	Services	Heating	Heat Source	Gas Boiler	25kW ecoTEC plus VUW 25/32CS/1-5 (N-FR)	plastic	0.00355
	56	Services	Heating	Emitter	Hot Water Radiator	1kW Galant Hot Water Radiator Range	steel	0.678234
	56	Services	Heating	Storage	Storage tank	300L ACV SMART E	steel	0.01442
	56	Services	Heating	Storage	Storage tank	300L ACV SMART E	stainless steel	0.00752
	56	Services	Heating	Storage	Storage tank	300L ACV SMART E	plastic	0.007012
	56	Services	Heating	Transportation	Heating pipe	22mm Plastic Pipe 2mm thickness	plastic	0.00670824
	56	Services	Electrical	Wiring	Electrical cable	2.5mm2 twin and earth cable	copper	0.00823284
	56	Services	Electrical	Wiring	Electrical cable	2.5mm2 twin and earth cable	plastic	0.00590436
	56	Services	Plumbing	Transportation	Plumbing pipe	160mm Plastic Soil Pipe 6.2 mm thickness	plastic	0.331309
	56	Structure	Wall	Load bearing	Stone	600mm thick limestone	limestone	475.675
	56	Structure	Floor	Load bearing	Insitu Concrete	65 mm thick cast concrete	concrete	30.03
	56	Structure	Roof	Load bearing	Timber	35 mm thick fink truss at 600mm c/c spacing	timber	1.32132
	56	Skin	Roof	Finish 1	Timber	19 mm thick timber or chipboard	chipboard	1.3167
	57	Skin	Wall	Internal finish	Plaster	13 mm thick dense plaster	plaster	6.09008
	57	Skin	Floor	Finish 1	Floor finish	10 mm thick carpet/underlay	carpet/underlay	0.231
	57	Skin	Opening	Door	Wooden door	OPUS Wooden Front Doors with glass	timber	0.363825
	57	Skin	Opening	Door	Wooden door	OPUS Wooden Front Doors with glass	glass	0.0606375
	57	Skin	Opening	Window	Metal frame window	Glass fiber fixed window OK	glass	0.580432
	57	Space	Wall	Finish 1	Plaster	13 mm thick lightweight plaster	plaster	1.4054
	57	Space	Wall	Intermediate finish 1	Timber	6.5 mm thick 35 mm wide timber laths	timber	0.22545
	57	Space	Wall	Non-Load Bearing Structure	Brick	105 mm thick brick	brick	33.1081
	57	Space	Wall	Intermediate support	Timber	95 mm thick studding at 600mm c/c spacing	timber studwork	1.20676
	57	Space	Wall	Intermediate finish 2	Timber	6.5 mm thick 35 mm wide timber laths	timber	0.22545
	57	Space	Wall	Finish 2	Plaster	13 mm thick dense plaster	plaster	3.04504
	57	Space	Floor	Finish 1	Floor finish	10 mm thick carpet/underlay	carpet/underlay	0.231
	57	Space	Floor	Intermediate finish 1	Screed	50 mm thick screed	screed	6.93
	57	Space	Floor	Finish 2	Plaster	13 mm thick lightweight plaster	plaster	0.9009
	57	Space	Opening	Door	Wooden Door	Forza FD60 Flush Solid Core Timber Door	timber	1.13994
	57	Services	Heating	Heat Source	Gas Boiler	24kW TZERRA Ace-Matic (DE)	steel	0.01266
	57	Services	Heating	Heat Source	Gas Boiler	24kW TZERRA Ace-Matic (DE)	stainless steel	0.00644
	57	Services	Heating	Heat Source	Gas Boiler	24kW TZERRA Ace-Matic (DE)	aluminium	0.00191
	57	Services	Heating	Heat Source	Gas Boiler	24kW TZERRA Ace-Matic (DE)	copper	0.00101
	57	Services	Heating	Heat Source	Gas Boiler	24kW TZERRA Ace-Matic (DE)	plastic	0.00733
	57	Services	Heating	Emitter	Hot Water Radiator	1kW Thermopanel V4	steel	0.462721
	57	Services	Heating	Emitter	Hot Water Radiator	1kW Thermopanel V4	brass	0.00203742
	57	Services	Heating	Emitter	Hot Water Radiator	1kW Thermopanel V4	plastic	0.00249018
	57	Services	Heating	Storage	Storage tank	300L ACV SMART E	steel	0.01442
	57	Services	Heating	Storage	Storage tank	300L ACV SMART E	stainless steel	0.00752
	57	Services	Heating	Storage	Storage tank	300L ACV SMART E	plastic	0.007012
	57	Services	Heating	Transportation	Heating pipe	22mm Copper Pipe 0.9mm thickness	copper	0.0404019
	57	Services	Electrical	Wiring	Electrical cable	2.5mm2 twin and earth cable	copper	0.00823284
	57	Services	Electrical	Wiring	Electrical cable	2.5mm2 twin and earth cable	plastic	0.00590436
	57	Services	Plumbing	Transportation	Plumbing pipe	32mm Plastic Waste Pipe 1.8 mm thickness	plastic	0.0188773
	57	Skin	Floor	Intermediate finish 1	Timber	19 mm thick timber or chipboard	chipboard	1.3167
	57	Structure	Wall	Load bearing	Brick	105 mm thick brick	brick	66.2161
	57	Structure	Floor	Load bearing	Timber	100 mm thick timber joists at 600mm c/c spacing	timber	1.62855
	57	Structure	Roof	Load bearing	Insitu Concrete	80 mm thick concrete	concrete	18.48
	57	Skin	Roof	Finish 1	Timber	19 mm thick timber or chipboard	chipboard	1.3167
	58	Skin	Wall	Internal finish	Plaster	13 mm thick lightweight plaster	plaster	2.81081
	58	Skin	Floor	Finish 1	Floor finish	10 mm thick carpet/underlay	carpet/underlay	0.231
	58	Skin	Floor	Intermediate finish 1	Screed	50 mm thick screed	screed	6.93
	58	Skin	Opening	Door	Steel door	Steel doors S30/Y30 - S63/Y63	timber	0.00545738
	58	Skin	Opening	Window	Wooden frame window	VELFAC Classic woodÂ–Top-guided window	timber	0.343012
	58	Skin	Opening	Window	Wooden frame window	VELFAC Classic woodÂ–Top-guided window	glass	0.723736
	58	Space	Wall	Finish 1	Plaster	13 mm thick dense plaster	plaster	3.04504
	58	Space	Wall	Intermediate finish 1	Timber	6.5 mm thick 35 mm wide timber laths	timber	0.22545
	58	Space	Wall	Non-Load Bearing Structure	Brick	215 mm thick brick	brick	67.7927
	58	Space	Wall	Intermediate support	Timber	95 mm thick studding at 600mm c/c spacing	timber studwork	1.20676
	58	Space	Wall	Intermediate finish 2	Timber	6.5 mm thick 35 mm wide timber laths	timber	0.22545
	58	Space	Wall	Finish 2	Plaster	13 mm thick dense plaster	plaster	3.04504
	58	Space	Floor	Finish 1	Floor finish	10 mm thick carpet/underlay	carpet/underlay	0.231
	58	Space	Floor	Intermediate finish 1	Timber	19 mm thick timber or chipboard	chipboard	1.3167
	58	Space	Floor	Finish 2	Plaster	13 mm thick lightweight plaster	plaster	0.9009
	58	Space	Opening	Door	Wooden Door	Forza FD60 Flush Solid Core Timber Door	timber	1.13994
	58	Services	Heating	Heat Source	Gas Boiler	20kW Mixed Wall mounted gas condensing boiler - MPX2 MI (FR)	steel	0.0181
	58	Services	Heating	Heat Source	Gas Boiler	20kW Mixed Wall mounted gas condensing boiler - MPX2 MI (FR)	aluminium	0.00193
	58	Services	Heating	Heat Source	Gas Boiler	20kW Mixed Wall mounted gas condensing boiler - MPX2 MI (FR)	brass	0.00135
	58	Services	Heating	Heat Source	Gas Boiler	20kW Mixed Wall mounted gas condensing boiler - MPX2 MI (FR)	plastic	0.00652
	58	Services	Heating	Emitter	Hot Water Radiator	1kW Fassane Pack double Ã ailettes	steel	0.707211
	58	Services	Heating	Emitter	Hot Water Radiator	1kW Fassane Pack double Ã ailettes	brass	0.0022638
	58	Services	Heating	Emitter	Hot Water Radiator	1kW Fassane Pack double Ã ailettes	plastic	0.00543312
	58	Services	Heating	Storage	Storage tank	606L HRI 600	steel	0.04476
	58	Services	Heating	Storage	Storage tank	606L HRI 600	stainless steel	0.03076
	58	Services	Heating	Storage	Storage tank	606L HRI 600	plastic	0.002796
	58	Services	Heating	Transportation	Heating pipe	15mm Plastic Pipe 1.5mm thickness	plastic	0.00647955
	58	Services	Electrical	Wiring	Electrical cable	2.5mm2 twin and earth cable	copper	0.00823284
	58	Services	Electrical	Wiring	Electrical cable	2.5mm2 twin and earth cable	plastic	0.00590436
	58	Services	Plumbing	Transportation	Plumbing pipe	32mm Plastic Waste Pipe 1.8 mm thickness	plastic	0.0188773
	58	Structure	Wall	Load bearing	Brick	215 mm thick brick	brick	135.585
	58	Structure	Floor	Load bearing	Timber	225 mm thick timber joists at 600mm c/c spacing	timber	3.66424
	58	Structure	Roof	Load bearing	Insitu Concrete	80 mm thick concrete	concrete	18.48
	58	Skin	Roof	Finish 1	Timber	19 mm thick timber or chipboard	chipboard	1.3167
	59	Skin	Wall	Internal finish	Plaster	13 mm thick dense plaster	plaster	6.09008
	59	Skin	Floor	Finish 1	Floor finish	10 mm thick carpet/underlay	carpet/underlay	0.231
	59	Skin	Opening	Door	Wooden door	OPUS Wooden Front Doors	timber	0.447505
	59	Skin	Opening	Window	Wooden frame window	VELFAC Classic woodÂ–Top-guided window	timber	0.343012
	59	Skin	Opening	Window	Wooden frame window	VELFAC Classic woodÂ–Top-guided window	glass	0.723736
	59	Space	Wall	Finish 1	Plaster	13 mm thick lightweight plaster	plaster	1.4054
	59	Space	Wall	Intermediate finish 1	Timber	6.5 mm thick 35 mm wide timber laths	timber	0.22545
	59	Space	Wall	Non-Load Bearing Structure	Brick	215 mm thick brick	brick	67.7927
	59	Space	Wall	Intermediate support	Timber	95 mm thick studding at 600mm c/c spacing	timber studwork	1.20676
	59	Space	Wall	Intermediate finish 2	Timber	6.5 mm thick 35 mm wide timber laths	timber	0.22545
	59	Space	Wall	Finish 2	Plaster	13 mm thick lightweight plaster	plaster	1.4054
	59	Space	Floor	Finish 1	Floor finish	10 mm thick carpet/underlay	carpet/underlay	0.231
	59	Space	Floor	Intermediate finish 1	Screed	50 mm thick screed	screed	6.93
	59	Space	Floor	Finish 2	Plaster	13 mm thick dense plaster	plaster	1.95195
	59	Space	Opening	Door	Wooden Door	Forza FD60 Flush Solid Core Timber Door	timber	1.13994
	59	Services	Heating	Heat Source	Gas Boiler	12.25kW Condensing Boiler Alteas one + Net 24	steel	0.01852
	59	Services	Heating	Heat Source	Gas Boiler	12.25kW Condensing Boiler Alteas one + Net 24	aluminium	0.00173
	59	Services	Heating	Heat Source	Gas Boiler	12.25kW Condensing Boiler Alteas one + Net 24	copper	0.00193
	59	Services	Heating	Heat Source	Gas Boiler	12.25kW Condensing Boiler Alteas one + Net 24	glass	0.00278
	59	Services	Heating	Heat Source	Gas Boiler	12.25kW Condensing Boiler Alteas one + Net 24	plastic	0.0041
	59	Services	Heating	Emitter	Hot Water Radiator	1kW Fassane Pack double Ã ailettes	steel	0.707211
	59	Services	Heating	Emitter	Hot Water Radiator	1kW Fassane Pack double Ã ailettes	brass	0.0022638
[truncated: 14,692 more rows]

## Sheet: Figure 5
Title: Material stock results for the study area as per different building levels of the HMI framework used for Figure 5 in the main paper.
	5a. Material quantities of building shearing layers
	Layer	Quantity(kt)
		pre 1920	post 2012
	Structure	4545.89	631.205
	Space	916.031	228.401
	Skin	241.956	210.325
	Services	11.1062	5.46
	5b. Material quantities of technologies in the structure layer
	Layer	Technology	Quantity(kt)
	Structure	Reinforced concrete	312.606
	Structure	Structural steel	0.0346003
	Structure	Prestressed concrete	15.1261
	Structure	Stone	3686.43
	Structure	Brick	732.047
	Structure	Insitu Concrete	213.5
	Structure	Timber	34.6638
	Structure	Precast concrete block	137.565
	Structure	Precast concrete panel	43.6051
	Structure	Cold formed steel framing (load bearing)	1.49498
	5c. Material quantities of reinforced concrete
	Layer	Technology	Material	Quantity(kt)
	Structure	Reinforced concrete	concrete	308.136
	Structure	Reinforced concrete	reinforcement bar	4.46997
	5d. Material quantities of the functions within the space layer
	Layer	Function	Quantity(kt)
	Space	Floor	156.798
	Space	Opening	17.8825
	Space	Wall	969.751
	5e. Material quantities of sub-functions within internal walls
	Layer	Function	Sub-Function	Quantity(kt)
	Space	Wall	Door	17.8825
	Space	Wall	Finish 1	40.0126
	Space	Wall	Finish 2	62.9878
	Space	Wall	Intermediate finish 1	131.244
	Space	Wall	Intermediate finish 2	9.336
	Space	Wall	Intermediate support	17.2701
	Space	Wall	Non-Load Bearing Structure	865.698
	5f. Material quantities of functions within the skin layer
	Layer	Functions	Quantity(kt)
	Skin	Floor	106.628
	Skin	Opening	23.1103
	Skin	Roof	54.9457
	Skin	Wall	267.597
	5g. Material quantities of specifications for roof finishes
	Layer	Function	Sub-Function	Technology	Specification	Quantity(kt)
	Skin	Roof	Finish 2	Sheet metal	0.4 mm thick sheet metal	0.0782891
	Skin	Roof	Finish 2	Sheet metal	0.7 mm thick sheet metal	0.254574
	Skin	Roof	Finish 2	Tiles	13 mm thick Clay tiles	11.5512
	Skin	Roof	Finish 2	Tiles	13 mm thick Concrete tiles	10.6862
	Skin	Roof	Finish 2	Tiles	13 mm thick Slate tiles	14.2482
	5h. Material quantities of the functions within the services layer
	Layer	Function	Quantity(kt)
	Services	Electrical	0.185899
	Services	Heating	14.5534
	Services	Plumbing	1.78645
	Services	Ventilation	0.0408381
	5i. Material quantities of heating technologies
	Layer	Function	Sub-Function	Technology	Quantity(kt)
	Services	Heating	Heat Source	Gas Boiler	0.888881
	Services	Heating	Heat Source	Air/Water Heat Pump	0.815526
	Services	Heating	Emitter	Hot Water Radiator	8.87467
	Services	Heating	Emitter	Electric Radiator	0.0913638
	Services	Heating	Storage	Storage tank	1.61605
	Services	Heating	Emitter	Underfloor heating	1.97303
	Services	Heating	Transportation	Heating pipe	0.293877
