# Supplementary material
Source: Research Square preprint supplement (doi:10.21203/rs.3.rs-9716648/v1)
Supplement: Supplementary file 2 [file 71c72b74a661b002b6144f4b.xlsx]

## Sheet: Readme
Supporting Information for
A hierarchical building material intensity framework for circular economy potential modelling
In this Supplementary Information SI1, data on the derived material intensities (MI) and additional information on construction subsytem rules for filtering suitable technologies is provided.
Sheet	Description
Subsystem	Construction subsystem rules for filtering suitable technologies
MI-low rise	Hierarchical material intensities for structure, skin and space of low rise single family houses
MI-Services	Hierarchical material intensities for building services
MI-Doors&Windows	Hierarchical material intensities for doors and windows
MI-Conc	Hierarchical material intensities for structure,skin and space of multistorey concrete frame apartment buildings

## Sheet: Subsystem
Title: Construction subsystem rules for filtering suitable technologies
System	Dataset attribute (from building inventory)	Building fabric info	Construction system	Possible technologies
Wall	wall_type	cavity	Wall-Cavity	Brick,Precast concrete block,Precast concrete panel
	wall_type	solid	Wall-Stone	Stone
	wall_type	solid	Wall-Solid brick	Brick
	wall_type	other	Wall-Timber frame	Timber,Brick
	wall_type	other	Wall-System built	Precast concrete panel
	wall_type	other	Wall-System built	Cold formed steel framing (load bearing)
Roof	roof_type	flat	Roof-Flat concrete	Insitu Concrete,Precast concrete block, Timber
	roof_type	flat	Roof-Flat timber	Timber
	roof_type	pitched	Roof-Pitched	Timber
Services	main_heat_type	boiler	Services-Boilers	Gas Boiler, Hot Water Radiator, Electric Radiator, Underfloor heating
	main_heat_type	heat pump	Services-Heat pumps	Air/Water Heat Pump, Hot Water Radiator, Electric Radiator, Underfloor heating
	main_heat_type	room/storage heaters	Services-Electric radiators	Electric Radiator
	main_heat_type	communal	Services-Underfloor heating	Hot Water Radiator, Underfloor heating

## Sheet: MI-low rise
Title: Hierarchical material intensities for structure, skin and space of low rise single family houses
Building levels						Material Density (kg/m3)	Thickness (mm)	MI	MI Unit	Age cohorts		REF
Layer	Function	Sub-Function	Technology	Specification	Material					<1920	2010-present
Structure	Wall	Load bearing	Precast concrete block	100 mm thick dense concrete block	concrete block	2300	100	230	kg/m2 (wall elevation area)		YES	1,2,3,4
Structure	Wall	Load bearing	Precast concrete block	100 mm thick lightweight aggregate concrete block	lightweight aggregate concrete block	600	100	60	kg/m2 (wall elevation area)		YES	1,2,3,4
Structure	Wall	Load bearing	Precast concrete block	200 mm thick dense concrete block	concrete block	2300	200	460	kg/m2 (wall elevation area)		YES	1,2,3,4
Structure	Wall	Load bearing	Precast concrete block	215 mm thick dense concrete block	concrete block	2300	215	494.5	kg/m2 (wall elevation area)		YES	1,2,3,4
Structure	Wall	Load bearing	Precast concrete block	220 mm thick no-fines concrete	no-fines concrete	2000	220	440	kg/m2 (wall elevation area)		YES	1,2,3,4
Structure	Wall	Load bearing	Precast concrete panel	220 mm thick no-fines concrete	no-fines concrete	2000	220	440	kg/m2 (wall elevation area)		YES	1,2,3,4
Structure	Wall	Load bearing	Precast concrete block	80 mm thick dense concrete	concrete block	2300	80	184	kg/m2 (wall elevation area)		YES	1,2,3,4
Structure	Wall	Load bearing	Precast concrete block	100 mm thick autoclaved aerated concrete block	autoclaved aerated concrete block	700	100	70	kg/m2 (wall elevation area)		YES	1,5,2,3,4
Structure	Wall	Load bearing	Precast concrete block	150 mm thick autoclaved aerated concrete block	autoclaved aerated concrete block	700	150	105	kg/m2 (wall elevation area)		YES	1,5,2,3,4
Structure	Wall	Load bearing	Stone	600 mm thick sandstone	sandstone	2300	600	1380	kg/m2 (wall elevation area)	YES		1,2,3,4
Structure	Wall	Load bearing	Stone	600mm thick limestone	limestone	2200	600	1320	kg/m2 (wall elevation area)	YES		1,2,3,4
Structure	Wall	Load bearing	Stone	600mm thick granite	granite	2600	600	1560	kg/m2 (wall elevation area)	YES		1,2,3,4
Structure	Wall	Load bearing	Stone	600mm thick slate	slate	2800	600	1680	kg/m2 (wall elevation area)	YES		1,2,3,4
Structure	Wall	Load bearing	Brick	220 mm thick brick	brick	1750	220	385	kg/m2 (wall elevation area)	YES	YES	1,2,6
Structure	Wall	Load bearing	Brick	105 mm thick brick	brick	1750	105	183.75	kg/m2 (wall elevation area)	YES	YES	1,2,6
Structure	Wall	Load bearing	Brick	215 mm thick brick	brick	1750	215	376.25	kg/m2 (wall elevation area)	YES		1,2,6
Structure	Wall	Load bearing	Cold formed steel framing (load bearing)	150 mm thick steel framing system	steel	7850	150	24.6	kg/m2 (wall elevation area)		YES	6
Structure	Floor	Load bearing	Insitu Concrete	150 mm thick cast concrete	concrete	2000	150	300	kg/m2 (floor area)	YES	YES	1,2,3,4
Structure	Floor	Load bearing	Insitu Concrete	65 mm thick cast concrete	concrete	2000	65	130	kg/m2 (floor area)	YES	YES	1,2,3,4
Structure	Floor	Load bearing	Precast concrete block	225 mm thick precast blocks	concrete block	2300	225	517.5	kg/m2 (floor area)		YES	1,2,3,4
Structure	Floor	Load bearing	Precast concrete block	250 mm thick precast blocks	concrete block	2300	250	575	kg/m2 (floor area)		YES	1,2,3,4
Structure	Floor	Load bearing	Timber	100 mm thick timber joists at 600mm c/c spacing	timber	500	100	7.05	kg/m2 (floor area)	YES	YES	1,7,2,8
Structure	Floor	Load bearing	Timber	125 mm thick timber joists at 600mm c/c spacing	timber	500	125	8.81	kg/m2 (floor area)	YES	YES	1,7,2,8
Structure	Floor	Load bearing	Timber	150 mm thick timber joists at 600mm c/c spacing	timber	500	150	10.575	kg/m2 (floor area)	YES	YES	1,7,2,8
Structure	Floor	Load bearing	Timber	200 mm thick timber joists at 600mm c/c spacing	timber	500	200	14.1	kg/m2 (floor area)	YES	YES	1,7,2,8
Structure	Floor	Load bearing	Timber	225 mm thick timber joists at 600mm c/c spacing	timber	500	225	15.8625	kg/m2 (floor area)	YES	YES	1,7,2,8
Structure	Roof	Load bearing	Insitu Concrete	150 mm thick cast concrete	concrete	2000	150	300	kg/m2 (roof area)	YES	YES	1,2,3,4
Structure	Roof	Load bearing	Insitu Concrete	65 mm thick cast concrete	concrete	2000	65	130	kg/m2 (roof area)	YES	YES	1,2,3,4
Structure	Roof	Load bearing	Insitu Concrete	80 mm thick concrete	concrete	2000	80	160	kg/m2 (roof area)	YES	YES	1,2,3,4
Structure	Roof	Load bearing	Precast concrete block	225 mm thick precast blocks	concrete block	2300	225	517.5	kg/m2 (roof area)		YES	1,2,3,4
Structure	Roof	Load bearing	Precast concrete block	250 mm thick precast blocks	concrete block	2300	250	575	kg/m2 (roof area)		YES	1,2,3,4
Structure	Roof	Load bearing	Timber	100 mm thick timber rafters at 600mm c/c spacing	timber	500	100	7.05	kg/m2 (roof area)	YES	YES	1,7,2,8
Structure	Roof	Load bearing	Timber	125 mm thick timber rafters at 600mm c/c spacing	timber	500	125	8.8125	kg/m2 (roof area)	YES	YES	1,7,2,8
Structure	Roof	Load bearing	Timber	150 mm thick timber rafters at 600mm c/c spacing	timber	500	150	10.575	kg/m2 (roof area)	YES	YES	1,7,2,8
Structure	Roof	Load bearing	Timber	35 mm thick fink truss at 600mm c/c spacing	timber	500	35	11.44	kg/m2 (roof area)	YES	YES	1,7,2,8
Structure	Roof	Load bearing	Steel section	121 mm thick steel section	steel	7800	121	9.57	kg/m2 (roof area)		YES	6
Structure	Roof	Load bearing	Steel section	140 mm thick steel section	steel	7800	140	11.82	kg/m2 (roof area)		YES	6
Skin	Wall	Non-Load Bearing Structure	Timber	25 mm thick timber battens at 600mm c/c spacing	timber studwork	500	25	1.7625	kg/m2 (wall elevation area)	YES	YES	1,7,2,8
Skin	Wall	Non-Load Bearing Structure	Timber	95 mm thick studding at 600mm c/c spacing	timber studwork	500	95	6.6975	kg/m2 (wall elevation area)	YES	YES	1,7,2,8
Skin	Wall	Non-Load Bearing Structure	Timber	140 mm thick studding at 600mm c/c spacing	timber studwork	500	140	9.87	kg/m2 (wall elevation area)	YES	YES	1,7,2,8
Skin	Wall	Non-Load Bearing Structure	Brick	105 mm thick brick	brick	1750	105	183.75	kg/m2 (wall elevation area)	YES	YES	1,2,6
Skin	Wall	Non-Load Bearing Structure	Brick	215 mm thick brick	brick	1750	215	376.25	kg/m2 (wall elevation area)	YES	YES	1,2,6
Skin	Wall	Non-Load Bearing Structure	Brick	220 mm thick brick	brick	1750	220	385	kg/m2 (wall elevation area)	YES		1,2,6
Skin	Wall	Non-Load Bearing Structure	Precast concrete block	100 mm thick dense concrete block	concrete block	2300	100	230	kg/m2 (wall elevation area)		YES	1,2,3,4
Skin	Wall	Non-Load Bearing Structure	Precast concrete block	100 mm thick lightweight aggregate concrete block	lightweight aggregate concrete block	600	100	60	kg/m2 (wall elevation area)		YES	1,2,3,4
Skin	Wall	Non-Load Bearing Structure	Precast concrete block	200 mm thick dense concrete block	concrete block	2300	200	460	kg/m2 (wall elevation area)		YES	1,2,3,4
Skin	Wall	Non-Load Bearing Structure	Precast concrete block	215 mm thick dense concrete block	concrete block	2300	215	494.5	kg/m2 (wall elevation area)		YES	1,2,3,4
Skin	Wall	Non-Load Bearing Structure	Precast concrete block	220 mm thick no-fines concrete	no-fines concrete	2000	220	440	kg/m2 (wall elevation area)		YES	1,2,3,4
Skin	Wall	Non-Load Bearing Structure	Precast concrete block	80 mm thick dense concrete	concrete block	2300	80	184	kg/m2 (wall elevation area)		YES	1,2,3,4
Skin	Wall	Non-Load Bearing Structure	Precast concrete block	100 mm thick autoclaved aerated concrete block	autoclaved aerated concrete block	700	100	70	kg/m2 (wall elevation area)		YES	1,5,2,3,4
Skin	Wall	Non-Load Bearing Structure	Precast concrete block	150 mm thick autoclaved aerated concrete block	autoclaved aerated concrete block	700	150	105	kg/m2 (wall elevation area)		YES	1,5,2,3,4
Skin	Wall	Insulation	Expanded polystyrene (EPS)	25 mm thick EPS insulation	expanded polystyrene (EPS)	15	25	0.375	kg/m2 (wall elevation area)			1,9,5,2
Skin	Wall	Insulation	Expanded polystyrene (EPS)	50 mm thick EPS insulation	expanded polystyrene (EPS)	15	50	0.75	kg/m2 (wall elevation area)			1,9,5,2
Skin	Wall	Insulation	Polyurethane foam (PU)	25 mm thick PU insulation	polyurethane foam	30	25	0.75	kg/m2 (wall elevation area)			1,10,9,2
Skin	Wall	Insulation	Polyurethane foam (PU)	35 mm thick PU insulation	polyurethane foam	30	35	1.05	kg/m2 (wall elevation area)			1,10,9,2
Skin	Wall	Insulation	Polyurethane foam (PU)	50 mm thick PU insulation	polyurethane foam	30	50	1.5	kg/m2 (wall elevation area)			1,10,9,2
Skin	Wall	Insulation	Polyurethane foam (PU)	100 mm thick PU insulation	polyurethane foam	30	100	3	kg/m2 (wall elevation area)		YES	1,10,9,2
Skin	Wall	Insulation	Polyurethane foam (PU)	150 mm thick PU insulation	polyurethane foam	30	150	4.5	kg/m2 (wall elevation area)		YES	1,10,9,2
Skin	Wall	Insulation	Polyurethane foam (PU)	200 mm thick PU insulation	polyurethane foam	30	200	6	kg/m2 (wall elevation area)		YES	1,10,9,2
Skin	Wall	Insulation	Mineral wool insulation	25 mm thick mineral wool quilt	mineral wool (quilt)	12	25	0.3	kg/m2 (wall elevation area)			1,10,9,2
Skin	Wall	Insulation	Mineral wool insulation	50 mm thick mineral wool quilt	mineral wool (quilt)	12	50	0.6	kg/m2 (wall elevation area)			1,10,9,2
Skin	Wall	Insulation	Mineral wool insulation	85 mm thick mineral wool quilt	mineral wool (quilt)	12	85	1.02	kg/m2 (wall elevation area)			1,10,9,2
Skin	Wall	Insulation	Mineral wool insulation	95 mm thick mineral wool quilt	mineral wool (quilt)	12	95	1.14	kg/m2 (wall elevation area)			1,10,9,2
Skin	Wall	Insulation	Mineral wool insulation	100 mm thick mineral wool quilt	mineral wool (quilt)	12	100	1.2	kg/m2 (wall elevation area)		YES	1,10,9,2
Skin	Wall	Insulation	Mineral wool insulation	140 mm thick mineral wool quilt	mineral wool (quilt)	12	140	1.68	kg/m2 (wall elevation area)		YES	1,10,9,2
Skin	Wall	Insulation	Mineral wool insulation	150 mm thick mineral wool quilt	mineral wool (quilt)	12	150	1.8	kg/m2 (wall elevation area)		YES	1,10,9,2
Skin	Wall	Insulation	Mineral wool insulation	200 mm thick mineral wool quilt	mineral wool (quilt)	12	200	2.4	kg/m2 (wall elevation area)		YES	1,10,9,2
Skin	Wall	Insulation	Blown fibre insulation	50 mm thick blown fibre insulation	blown fibre	12	50	0.6	kg/m2 (wall elevation area)			1,11,12,2
Skin	Wall	Insulation	Blown fibre insulation	100 mm thick blown fibre insulation	blown fibre	12	100	1.2	kg/m2 (wall elevation area)			1,11,12,2
Skin	Wall	Insulation	Urea Formaldehyde (UF) foam	50 mm thick UF foam insulation	urea formaldehyde (UF) foam	10	50	0.5	kg/m2 (wall elevation area)			1,13,2
Skin	Wall	Insulation	No Insulation	Airspace	airspace	0	0	0	kg/m2 (wall elevation area)	YES
Skin	Wall	Internal finish	Timber	19 mm thick plywood sheathing	plywood	500	19	9.5	kg/m2 (wall elevation area)		YES	1,14
Skin	Wall	Internal finish	Plaster	13 mm thick dense plaster	plaster	1300	13	16.9	kg/m2 (wall elevation area)	YES	YES	1,2
Skin	Wall	Internal finish	Plaster	13 mm thick lightweight plaster	plaster	600	13	7.8	kg/m2 (wall elevation area)	YES	YES	1,2
Skin	Wall	Internal finish	Plasterboard	12.5 mm thick plasterboard	plasterboard	700	12.5	8.75	kg/m2 (wall elevation area)		YES	1,15
Skin	Wall	Internal finish	Plasterboard	13 mm thick dense plasterboard	plasterboard	900	13	11.7	kg/m2 (wall elevation area)		YES	1,15
Skin	Wall	Internal finish	Plasterboard	15 mm thick plasterboard	plasterboard	700	15	10.5	kg/m2 (wall elevation area)		YES	1,15
Skin	Floor	Finish 1	Floor finish	4 mm thick vinyl covering	vinyl floor covering	1390	4	5.56	kg/m2 (floor area)		YES	1,16
Skin	Floor	Finish 1	Floor finish	10 mm thick carpet/underlay	carpet/underlay	200	10	2	kg/m2 (floor area)	YES	YES	1,2
Skin	Floor	Intermediate finish 1	Timber	25 mm thick wood block	timber	700	25	17.5	kg/m2 (floor area)		YES	1,17
Skin	Floor	Intermediate finish 1	Timber	19 mm thick timber or chipboard	chipboard	600	19	11.4	kg/m2 (floor area)	YES	YES	1,2
Skin	Floor	Intermediate finish 1	Screed	50 mm thick screed	screed	1200	50	60	kg/m2 (floor area)	YES	YES	1,2,3,4
Skin	Floor	Intermediate finish 1	Screed	75 mm thick screed	screed	1200	75	90	kg/m2 (floor area)	YES	YES	1,2,3,4
Skin	Floor	Insulation	Expanded polystyrene (EPS)	25 mm thick EPS insulation	expanded polystyrene (EPS)	15	25	0.375	kg/m2 (floor area)			1,9,5,2
Skin	Floor	Insulation	Expanded polystyrene (EPS)	50 mm thick EPS insulation	expanded polystyrene (EPS)	15	50	0.75	kg/m2 (floor area)			1,9,5,2
Skin	Floor	Insulation	Polyurethane foam (PU)	25 mm thick PU insulation	polyurethane foam	30	25	0.75	kg/m2 (floor area)			1,10,9,2
Skin	Floor	Insulation	Polyurethane foam (PU)	35 mm thick PU insulation	polyurethane foam	30	35	1.05	kg/m2 (floor area)			1,10,9,2
Skin	Floor	Insulation	Polyurethane foam (PU)	50 mm thick PU insulation	polyurethane foam	30	50	1.5	kg/m2 (floor area)			1,10,9,2
Skin	Floor	Insulation	Polyurethane foam (PU)	100 mm thick PU insulation	polyurethane foam	30	100	3	kg/m2 (floor area)		YES	1,10,9,2
Skin	Floor	Insulation	Polyurethane foam (PU)	150 mm thick PU insulation	polyurethane foam	30	150	4.5	kg/m2 (floor area)		YES	1,10,9,2
Skin	Floor	Insulation	Polyurethane foam (PU)	200 mm thick PU insulation	polyurethane foam	30	200	6	kg/m2 (floor area)		YES	1,10,9,2
Skin	Floor	Insulation	Mineral wool insulation	25 mm thick mineral wool quilt	mineral wool (quilt)	12	25	0.3	kg/m2 (floor area)			1,10,9,2
Skin	Floor	Insulation	Mineral wool insulation	50 mm thick mineral wool quilt	mineral wool (quilt)	12	50	0.6	kg/m2 (floor area)			1,10,9,2
Skin	Floor	Insulation	Mineral wool insulation	85 mm thick mineral wool quilt	mineral wool (quilt)	12	85	1.02	kg/m2 (floor area)			1,10,9,2
Skin	Floor	Insulation	Mineral wool insulation	95 mm thick mineral wool quilt	mineral wool (quilt)	12	95	1.14	kg/m2 (floor area)			1,10,9,2
Skin	Floor	Insulation	Mineral wool insulation	100 mm thick mineral wool quilt	mineral wool (quilt)	12	100	1.2	kg/m2 (floor area)		YES	1,10,9,2
Skin	Floor	Insulation	Mineral wool insulation	140 mm thick mineral wool quilt	mineral wool (quilt)	12	140	1.68	kg/m2 (floor area)		YES	1,10,9,2
Skin	Floor	Insulation	Mineral wool insulation	150 mm thick mineral wool quilt	mineral wool (quilt)	12	150	1.8	kg/m2 (floor area)		YES	1,10,9,2
Skin	Floor	Insulation	Mineral wool insulation	200 mm thick mineral wool quilt	mineral wool (quilt)	12	200	2.4	kg/m2 (floor area)		YES	1,10,9,2
Skin	Floor	Insulation	Blown fibre insulation	50 mm thick blown fibre insulation	blown fibre	12	50	0.6	kg/m2 (floor area)			1,11,12,2
Skin	Floor	Insulation	Blown fibre insulation	100 mm thick blown fibre insulation	blown fibre	12	100	1.2	kg/m2 (floor area)			1,11,12,2
Skin	Floor	Insulation	Urea Formaldehyde (UF) foam	50 mm thick UF foam insulation	urea formaldehyde (UF) foam	10	50	0.5	kg/m2 (floor area)			1,13,2
Skin	Floor	Insulation	No Insulation	Airspace	airspace	0	0	0	kg/m2 (floor area)	YES
Skin	Roof	Finish 1	Timber	19 mm thick timber or chipboard	chipboard	600	19	11.4	kg/m2 (roof area)	YES	YES	1,2
Skin	Roof	Finish 1	Plasterboard	12.5 mm thick plasterboard	plasterboard	700	12.5	8.75	kg/m2 (roof area)		YES	1,15
Skin	Roof	Finish 1	Plasterboard	13 mm thick dense plasterboard	plasterboard	900	13	11.7	kg/m2 (roof area)		YES	1,15
Skin	Roof	Finish 1	Plasterboard	15 mm thick plasterboard	plasterboard	700	15	10.5	kg/m2 (roof area)		YES	1,15
Skin	Roof	Finish 1	Plaster	13 mm thick dense plaster	plaster	1300	13	16.9	kg/m2 (roof area)	YES	YES	1,2
Skin	Roof	Finish 1	Plaster	13 mm thick lightweight plaster	plaster	600	13	7.8	kg/m2 (roof area)	YES	YES	1,2
Skin	Roof	Insulation	No Insulation	Airspace	airspace	0	0	0	kg/m2 (roof area)	YES
Skin	Roof	Insulation	Expanded polystyrene (EPS)	25 mm thick EPS insulation	expanded polystyrene (EPS)	15	25	0.375	kg/m2 (roof area)			1,9,5,2
Skin	Roof	Insulation	Expanded polystyrene (EPS)	50 mm thick EPS insulation	expanded polystyrene (EPS)	15	50	0.75	kg/m2 (roof area)			1,9,5,2
Skin	Roof	Insulation	Polyurethane foam (PU)	25 mm thick PU insulation	polyurethane foam	30	25	0.75	kg/m2 (roof area)			1,10,9,2
Skin	Roof	Insulation	Polyurethane foam (PU)	35 mm thick PU insulation	polyurethane foam	30	35	1.05	kg/m2 (roof area)			1,10,9,2
Skin	Roof	Insulation	Polyurethane foam (PU)	50 mm thick PU insulation	polyurethane foam	30	50	1.5	kg/m2 (roof area)			1,10,9,2
Skin	Roof	Insulation	Polyurethane foam (PU)	100 mm thick PU insulation	polyurethane foam	30	100	3	kg/m2 (roof area)			1,10,9,2
Skin	Roof	Insulation	Polyurethane foam (PU)	150 mm thick PU insulation	polyurethane foam	30	150	4.5	kg/m2 (roof area)		YES	1,10,9,2
Skin	Roof	Insulation	Polyurethane foam (PU)	200 mm thick PU insulation	polyurethane foam	30	200	6	kg/m2 (roof area)		YES	1,10,9,2
Skin	Roof	Insulation	Mineral wool insulation	25 mm thick mineral wool quilt	mineral wool (quilt)	12	25	0.3	kg/m2 (roof area)			1,10,9,2
Skin	Roof	Insulation	Mineral wool insulation	50 mm thick mineral wool quilt	mineral wool (quilt)	12	50	0.6	kg/m2 (roof area)			1,10,9,2
Skin	Roof	Insulation	Mineral wool insulation	85 mm thick mineral wool quilt	mineral wool (quilt)	12	85	1.02	kg/m2 (roof area)			1,10,9,2
Skin	Roof	Insulation	Mineral wool insulation	95 mm thick mineral wool quilt	mineral wool (quilt)	12	95	1.14	kg/m2 (roof area)			1,10,9,2
Skin	Roof	Insulation	Mineral wool insulation	100 mm thick mineral wool quilt	mineral wool (quilt)	12	100	1.2	kg/m2 (roof area)			1,10,9,2
Skin	Roof	Insulation	Mineral wool insulation	140 mm thick mineral wool quilt	mineral wool (quilt)	12	140	1.68	kg/m2 (roof area)			1,10,9,2
Skin	Roof	Insulation	Mineral wool insulation	150 mm thick mineral wool quilt	mineral wool (quilt)	12	150	1.8	kg/m2 (roof area)			1,10,9,2
Skin	Roof	Insulation	Mineral wool insulation	200 mm thick mineral wool quilt	mineral wool (quilt)	12	200	2.4	kg/m2 (roof area)		YES	1,10,9,2
Skin	Roof	Insulation	Blown fibre insulation	50 mm thick blown fibre insulation	blown fibre	12	50	0.6	kg/m2 (roof area)			1,11,12,2
Skin	Roof	Insulation	Blown fibre insulation	100 mm thick blown fibre insulation	blown fibre	12	100	1.2	kg/m2 (roof area)			1,11,12,2
Skin	Roof	Insulation	Urea Formaldehyde (UF) foam	50 mm thick UF foam insulation	urea formaldehyde (UF) foam	10	50	0.5	kg/m2 (roof area)			1,13,2
Skin	Roof	Intermediate finish 1	Screed	50 mm thick screed	screed	1200	50	60	kg/m2 (roof area)		YES	1,2,3,4
Skin	Roof	Intermediate finish 1	Screed	75 mm thick screed	screed	1200	75	90	kg/m2 (roof area)		YES	1,2,3,4
Skin	Roof	Intermediate support	Timber	19 mm thick timber decking	timber	500	19	9.5	kg/m2 (roof area)		YES	1,17
Skin	Roof	Intermediate finish 2	Roofing felt	3 mm thick roofing felt	roofing felt	61.6667	3	0.185	kg/m2 (roof area)		YES	1,18
Skin	Roof	Intermediate finish 2	Covering	0.3 mm thick Polyethylene vapour control	polyethylene vapour control	900	0.3	0.27	kg/m2 (roof area)		YES	1
Skin	Roof	Intermediate finish 2	Covering	4 mm thick water proof covering	waterproof roof covering	110	4	0.44	kg/m2 (roof area)		YES	1,19
Skin	Roof	Finish 2	Sheet metal	0.4 mm thick sheet metal	steel	7800	0.4	3.12	kg/m2 (roof area)		YES	1,2,6
Skin	Roof	Finish 2	Sheet metal	0.7 mm thick sheet metal	steel	7800	0.7	5.46	kg/m2 (roof area)		YES	1,2,6
Skin	Roof	Finish 2	Tiles	13 mm thick Clay tiles	clay tiles	2270	13	29.51	kg/m2 (roof area)	YES	YES	1,2
Skin	Roof	Finish 2	Tiles	13 mm thick Concrete tiles	concrete tiles	2100	13	27.3	kg/m2 (roof area)	YES	YES	1,2
Skin	Roof	Finish 2	Tiles	13 mm thick Slate tiles	slate tiles	2800	13	36.4	kg/m2 (roof area)	YES	YES	1,2
Skin	Roof	Finish 2	Ballast	75 mm thick ballast (gravel)	ballast (gravel)	1800	75	135	kg/m2 (roof area)		YES	1,2
Space	Wall	Finish 1	Plaster	13 mm thick dense plaster	plaster	1300	13	16.9	kg/m2 (wall elevation area)	YES	YES	1,2
Space	Wall	Finish 1	Plaster	13 mm thick lightweight plaster	plaster	600	13	7.8	kg/m2 (wall elevation area)	YES	YES	1,2
Space	Wall	Finish 1	Plasterboard	12.5 mm thick plasterboard	plasterboard	700	12.5	8.75	kg/m2 (wall elevation area)		YES	1,15
Space	Wall	Finish 1	Plasterboard	13 mm thick dense plasterboard	plasterboard	900	13	11.7	kg/m2 (wall elevation area)		YES	1,15
Space	Wall	Finish 1	Plasterboard	15 mm thick plasterboard	plasterboard	700	15	10.5	kg/m2 (wall elevation area)		YES	1,15
Space	Wall	Finish 1	Plasterboard	19 mm thick plywood sheathing	plywood	500	19	9.5	kg/m2 (wall elevation area)		YES	1,14
Space	Wall	Intermediate finish 1	Timber	6.5 mm thick 35 mm wide timber laths	timber	500	6.5	1.25125	kg/m2 (wall elevation area)	YES		1,2
Space	Wall	Intermediate finish 1	Timber	19 mm thick timber or chipboard	chipboard	600	19	11.4	kg/m2 (wall elevation area)		YES	1,2
Space	Wall	Non-Load Bearing Structure	Brick	105 mm thick brick	brick	1750	105	183.75	kg/m2 (wall elevation area)	YES	YES	1,2,6
Space	Wall	Non-Load Bearing Structure	Brick	215 mm thick brick	brick	1750	215	376.25	kg/m2 (wall elevation area)	YES	YES	1,2,6
Space	Wall	Non-Load Bearing Structure	Brick	220 mm thick brick	brick	1750	220	385	kg/m2 (wall elevation area)	YES		1,2,6
Space	Wall	Non-Load Bearing Structure	Precast concrete block	100 mm thick dense concrete block	concrete block	2300	100	230	kg/m2 (wall elevation area)		YES	1,2,3,4
Space	Wall	Non-Load Bearing Structure	Precast concrete block	100 mm thick lightweight aggregate concrete block	lightweight aggregate concrete block	600	100	60	kg/m2 (wall elevation area)		YES	1,2,3,4
Space	Wall	Non-Load Bearing Structure	Precast concrete block	200 mm thick dense concrete block	concrete block	2300	200	460	kg/m2 (wall elevation area)		YES	1,2,3,4
Space	Wall	Non-Load Bearing Structure	Precast concrete block	215 mm thick dense concrete block	concrete block	2300	215	494.5	kg/m2 (wall elevation area)		YES	1,2,3,4
Space	Wall	Non-Load Bearing Structure	Precast concrete block	220 mm thick no-fines concrete	no-fines concrete	2000	220	440	kg/m2 (wall elevation area)		YES	1,2,3,4
Space	Wall	Non-Load Bearing Structure	Precast concrete block	80 mm thick dense concrete	concrete block	2300	80	184	kg/m2 (wall elevation area)		YES	1,2,3,4
Space	Wall	Non-Load Bearing Structure	Precast concrete block	100 mm thick autoclaved aerated concrete block	autoclaved aerated concrete block	700	100	70	kg/m2 (wall elevation area)		YES	1,5,2,3,4
Space	Wall	Non-Load Bearing Structure	Precast concrete block	150 mm thick autoclaved aerated concrete block	autoclaved aerated concrete block	700	150	105	kg/m2 (wall elevation area)		YES	1,5,2,3,4
Space	Wall	Intermediate support	Timber	95 mm thick studding at 600mm c/c spacing	timber studwork	500	95	6.6975	kg/m2 (wall elevation area)	YES	YES	1,7,2,8
Space	Wall	Intermediate support	Timber	140 mm thick studding at 600mm c/c spacing	timber studwork	500	140	9.87	kg/m2 (wall elevation area)	YES	YES	1,7,2,8
Space	Wall	Intermediate support	Timber	25 mm thick timber battens at 600mm c/c spacing	timber studwork	500	25	1.7625	kg/m2 (wall elevation area)	YES	YES	1,7,2,8
Space	Wall	Intermediate finish 2	Timber	6.5 mm thick 35 mm wide timber laths	timber	500	6.5	1.25125	kg/m2 (wall elevation area)	YES		1,2
Space	Wall	Intermediate finish 2	Timber	19 mm thick timber or chipboard	chipboard	600	19	11.4	kg/m2 (wall elevation area)		YES	1,2
Space	Wall	Finish 2	Plasterboard	12.5 mm thick plasterboard	plasterboard	700	12.5	8.75	kg/m2 (wall elevation area)		YES	1,15
Space	Wall	Finish 2	Plasterboard	13 mm thick dense plasterboard	plasterboard	900	13	11.7	kg/m2 (wall elevation area)		YES	1,15
Space	Wall	Finish 2	Plasterboard	15 mm thick plasterboard	plasterboard	700	15	10.5	kg/m2 (wall elevation area)		YES	1,15
Space	Wall	Finish 2	Plasterboard	19 mm thick plywood sheathing	plywood	500	19	9.5	kg/m2 (wall elevation area)		YES	1,14
Space	Wall	Finish 2	Plaster	13 mm thick dense plaster	plaster	1300	13	16.9	kg/m2 (wall elevation area)	YES	YES	1,2
Space	Wall	Finish 2	Plaster	13 mm thick lightweight plaster	plaster	600	13	7.8	kg/m2 (wall elevation area)	YES	YES	1,2
Space	Floor	Finish 1	Floor finish	4 mm thick vinyl covering	vinyl floor covering	1390	4	5.56	kg/m2 (floor area)		YES	1,16
Space	Floor	Finish 1	Floor finish	10 mm thick carpet/underlay	carpet/underlay	200	10	2	kg/m2 (floor area)	YES	YES	1,2
Space	Floor	Intermediate finish 1	Timber	25 mm thick wood block	timber	700	25	17.5	kg/m2 (floor area)		YES	1,17
Space	Floor	Intermediate finish 1	Timber	19 mm thick timber or chipboard	chipboard	600	19	11.4	kg/m2 (floor area)	YES	YES	1,2
Space	Floor	Intermediate finish 1	Screed	50 mm thick screed	screed	1200	50	60	kg/m2 (floor area)	YES	YES	1,2,3,4
Space	Floor	Intermediate finish 1	Screed	75 mm thick screed	screed	1200	75	90	kg/m2 (floor area)	YES	YES	1,2,3,4
Space	Floor	Finish 2	Building board	12 mm thick cementitious building board on underside	cement bonded particleboard	1200	12	14.4	kg/m2 (floor area)		YES	1,20
Space	Floor	Finish 2	Plasterboard	12.5 mm thick plasterboard	plasterboard	700	12.5	8.75	kg/m2 (floor area)		YES	1,15
Space	Floor	Finish 2	Plasterboard	13 mm thick dense plasterboard	plasterboard	900	13	11.7	kg/m2 (floor area)		YES	1,15
Space	Floor	Finish 2	Plasterboard	15 mm thick plasterboard	plasterboard	700	15	10.5	kg/m2 (floor area)		YES	1,15
Space	Floor	Finish 2	Plaster	13 mm thick dense plaster	plaster	1300	13	16.9	kg/m2 (floor area)	YES	YES	1,2
Space	Floor	Finish 2	Plaster	13 mm thick lightweight plaster	plaster	600	13	7.8	kg/m2 (floor area)	YES	YES	1,2
References
	1	CIBSE (2015). Environmental design : CIBSE guide A. London: Chartered Institution Of Building Services Engineers.
	2	Geoffrey Hunt (no date) . Architectural Time Line A history of building in the UK from the 15th century to the present day.
	3	Hashemi, A. (2013). Review of the UK housing history in relation to system building. 6(1), pp.47–58
	4	Drewniok, M.P., Azevedo, J.M.C., Dunant, C.F., Allwood, J.M., Cullen, J.M., Ibell, T. and Hawkins, W. (2022). Mapping Material Use and Embodied Carbon in UK Construction. SSRN Electronic Journal. doi:https://doi.org/10.2139/ssrn.4153659.
	5	Designingbuildings.co.uk. (2023). Autoclaved aerated concrete. [online] Available at: https://www.designingbuildings.co.uk/wiki/Autoclaved_aerated_concrete [Accessed 13 Mar. 2025]. ‌
	6	Cobb, F. (2009) Structural engineer's pocket book [electronic resource]. 2nd ed. Oxford: Butterworth-Heinemann.
	7	Designingbuildings.co.uk. (2022). The history of timber construction in the UK. [online] www.designingbuildings.co.uk. Available at: https://www.designingbuildings.co.uk/wiki/The_history_of_timber_construction_in_the_UK.
	8	Romero Perez de Tudela, A., Rose, C.M. and Stegemann, J.A. (2020). Quantification of material stocks in existing buildings using secondary data—A case study for timber in a London Borough. Resources, Conservation & Recycling: X, 5, p.100027. doi:https://doi.org/10.1016/j.rcrx.2019.100027.
	9	Buy Insulation Online. (n.d.). Facts About Expanded Polystyrene Insulation | Insulation Blog. [online] Available at: https://www.buyinsulationonline.co.uk/blog/facts-about-expanded-polystyrene-insulation.
	10	First Choice Energy. (n.d.). Different types of cavity wall insulation… and their pros and cons! [online] Available at: https://firstchoiceenergy.co.uk/cavity-wall-insulation-removal/insulation-material-pros-cons/.
	11	Buy Insulation Online (n.d.). The History of Insulation | Buy Insulation Online Blog. [online] Buy Insulation Online. Available at: https://www.buyinsulationonline.co.uk/blog/the-history-of-insulation.
	12	Eco Spray-Foam Systems (2019). A History of Home Insulation – Traditional Insulations. [online] www.sprayfoam.co.uk. Available at: https://www.sprayfoam.co.uk/blog/traditional-insulation-history.html.
	13	BuildingMaterials.co.uk. (2024). Can Cavity Wall Insulation be Removed? [online] Available at: https://www.buildingmaterials.co.uk/info-hub/insulation/can-cavity-wall-insulation-be-removed [Accessed 18 Feb. 2025].
	14	Summers, G. (2025). PLYWOOD: THE UNLIKELY MODERN ICON. [online] The Fine Art Society Ltd. Available at: https://www.thefineartsociety.com/journal/issue-1/plywood-the-unlikely-modern-icon/ [Accessed 16 Dec. 2025].
	15	Gracesguide.co.uk. (2021). British Plaster Board - Graces Guide. [online] Available at: https://www.gracesguide.co.uk/British_Plaster_Board [Accessed 17 Feb. 2025].
	16	Floorbay (2024). The history and development of vinyl flooring. [online] Floorbay. Available at: https://www.floorbay.co.uk/blog/history-of-vinyl-flooring/.
	17	Fisher, J. (2024). What’s the difference between wooden and composite decking? [online] Select Living Group. Available at: https://selectlivinggroup.co.uk/blogs/blog/composite-decking-vs-natural-wood-decking [Accessed 19 Mar. 2025].
	18	martincastree (2021). Sarking Felt (Part 2) - Domestic Surveys. [online] Domestic Surveys. Available at: https://www.domesticsurveys.co.uk/2021/07/15/lapped-domestic-survey-blog/ [Accessed 19 Dec. 2025].
	19	Widopan.co.uk. (2022). The Evolution Of Waterproofing Materials - WIDOPAN UK. [online] Available at: https://widopan.co.uk/news/evolution-waterproofing-materials [Accessed 19 Dec. 2025].
	20	Saunders, A. and Davidson, E. (2013). Cement Boards 101. [online] www.globalcement.com. Available at: https://www.globalcement.com/magazine/articles/825-cement-boards-101.

## Sheet: MI-Services
Title: Hierarchical material intensities for building services
Building levels						MI	MI Unit	Age cohorts		Ref
Layer	Function	Sub-Function	Technology	Specification	Material			<1920	2010-present
Services	Heating	Heat Source	Gas Boiler	12.25kW Condensing Boiler Alteas one + Net 24	steel	18.52	kg/unit	YES	YES	1
Services	Heating	Heat Source	Gas Boiler	12.25kW Condensing Boiler Alteas one + Net 24	aluminium	1.73	kg/unit	YES	YES	1
Services	Heating	Heat Source	Gas Boiler	12.25kW Condensing Boiler Alteas one + Net 24	copper	1.93	kg/unit	YES	YES	1
Services	Heating	Heat Source	Gas Boiler	12.25kW Condensing Boiler Alteas one + Net 24	glass	2.78	kg/unit	YES	YES	1
Services	Heating	Heat Source	Gas Boiler	12.25kW Condensing Boiler Alteas one + Net 24	plastic	4.1	kg/unit	YES	YES	1
Services	Heating	Heat Source	Gas Boiler	16kW Mixed Wall mounted gas condensing boiler - Accea	steel	11.91	kg/unit	YES	YES	2
Services	Heating	Heat Source	Gas Boiler	16kW Mixed Wall mounted gas condensing boiler - Accea	stainless steel	8.35	kg/unit	YES	YES	2
Services	Heating	Heat Source	Gas Boiler	16kW Mixed Wall mounted gas condensing boiler - Accea	aluminium	1.86	kg/unit	YES	YES	2
Services	Heating	Heat Source	Gas Boiler	16kW Mixed Wall mounted gas condensing boiler - Accea	copper	1.04	kg/unit	YES	YES	2
Services	Heating	Heat Source	Gas Boiler	16kW Mixed Wall mounted gas condensing boiler - Accea	brass	0.13	kg/unit	YES	YES	2
Services	Heating	Heat Source	Gas Boiler	16kW Mixed Wall mounted gas condensing boiler - Accea	plastic	6.92	kg/unit	YES	YES	2
Services	Heating	Heat Source	Gas Boiler	24kW Mixed Wall mounted gas condensing boiler - MCR-S	steel	10.81	kg/unit	YES	YES	3
Services	Heating	Heat Source	Gas Boiler	24kW Mixed Wall mounted gas condensing boiler - MCR-S	stainless steel	7.6	kg/unit	YES	YES	3
Services	Heating	Heat Source	Gas Boiler	24kW Mixed Wall mounted gas condensing boiler - MCR-S	aluminium	1.68	kg/unit	YES	YES	3
Services	Heating	Heat Source	Gas Boiler	24kW Mixed Wall mounted gas condensing boiler - MCR-S	copper	0.92	kg/unit	YES	YES	3
Services	Heating	Heat Source	Gas Boiler	24kW Mixed Wall mounted gas condensing boiler - MCR-S	brass	0.12	kg/unit	YES	YES	3
Services	Heating	Heat Source	Gas Boiler	24kW Mixed Wall mounted gas condensing boiler - MCR-S	plastic	6.67	kg/unit	YES	YES	3
Services	Heating	Heat Source	Gas Boiler	24kW Mixed Wall mounted gas condensing boiler - MPX2 MI (BE)	steel	18.21	kg/unit	YES	YES	4
Services	Heating	Heat Source	Gas Boiler	24kW Mixed Wall mounted gas condensing boiler - MPX2 MI (BE)	aluminium	1.93	kg/unit	YES	YES	4
Services	Heating	Heat Source	Gas Boiler	24kW Mixed Wall mounted gas condensing boiler - MPX2 MI (BE)	copper	0.98	kg/unit	YES	YES	4
Services	Heating	Heat Source	Gas Boiler	24kW Mixed Wall mounted gas condensing boiler - MPX2 MI (BE)	brass	1.35	kg/unit	YES	YES	4
Services	Heating	Heat Source	Gas Boiler	24kW Mixed Wall mounted gas condensing boiler - MPX2 MI (BE)	plastic	6.6	kg/unit	YES	YES	4
Services	Heating	Heat Source	Gas Boiler	24kW Mixed Wall mounted gas condensing boiler - MPX2 System (BE)	steel	17.38	kg/unit	YES	YES	5
Services	Heating	Heat Source	Gas Boiler	24kW Mixed Wall mounted gas condensing boiler - MPX2 System (BE)	aluminium	1.93	kg/unit	YES	YES	5
Services	Heating	Heat Source	Gas Boiler	24kW Mixed Wall mounted gas condensing boiler - MPX2 System (BE)	copper	1.11	kg/unit	YES	YES	5
Services	Heating	Heat Source	Gas Boiler	24kW Mixed Wall mounted gas condensing boiler - MPX2 System (BE)	brass	1.13	kg/unit	YES	YES	5
Services	Heating	Heat Source	Gas Boiler	24kW Mixed Wall mounted gas condensing boiler - MPX2 System (BE)	plastic	6.59	kg/unit	YES	YES	5
Services	Heating	Heat Source	Gas Boiler	20kW Mixed Wall mounted gas condensing boiler - MPX2 MI (FR)	steel	18.1	kg/unit	YES	YES	6
Services	Heating	Heat Source	Gas Boiler	20kW Mixed Wall mounted gas condensing boiler - MPX2 MI (FR)	aluminium	1.93	kg/unit	YES	YES	6
Services	Heating	Heat Source	Gas Boiler	20kW Mixed Wall mounted gas condensing boiler - MPX2 MI (FR)	copper	0.98	kg/unit	YES	YES	6
Services	Heating	Heat Source	Gas Boiler	20kW Mixed Wall mounted gas condensing boiler - MPX2 MI (FR)	brass	1.35	kg/unit	YES	YES	6
Services	Heating	Heat Source	Gas Boiler	20kW Mixed Wall mounted gas condensing boiler - MPX2 MI (FR)	plastic	6.52	kg/unit	YES	YES	6
Services	Heating	Heat Source	Gas Boiler	24kW Mixed Wall mounted gas condensing boiler - MPX2 System (FR)	steel	17.39	kg/unit	YES	YES	7
Services	Heating	Heat Source	Gas Boiler	24kW Mixed Wall mounted gas condensing boiler - MPX2 System (FR)	aluminium	1.93	kg/unit	YES	YES	7
Services	Heating	Heat Source	Gas Boiler	24kW Mixed Wall mounted gas condensing boiler - MPX2 System (FR)	copper	1.11	kg/unit	YES	YES	7
Services	Heating	Heat Source	Gas Boiler	24kW Mixed Wall mounted gas condensing boiler - MPX2 System (FR)	brass	1.12	kg/unit	YES	YES	7
Services	Heating	Heat Source	Gas Boiler	24kW Mixed Wall mounted gas condensing boiler - MPX2 System (FR)	plastic	6.49	kg/unit	YES	YES	7
Services	Heating	Heat Source	Gas Boiler	20kW AVANTA ACE (export)	steel	11.87	kg/unit	YES	YES	8
Services	Heating	Heat Source	Gas Boiler	20kW AVANTA ACE (export)	stainless steel	6.61	kg/unit	YES	YES	8
Services	Heating	Heat Source	Gas Boiler	20kW AVANTA ACE (export)	aluminium	1.84	kg/unit	YES	YES	8
Services	Heating	Heat Source	Gas Boiler	20kW AVANTA ACE (export)	copper	1.01	kg/unit	YES	YES	8
Services	Heating	Heat Source	Gas Boiler	20kW AVANTA ACE (export)	brass	0.13	kg/unit	YES	YES	8
Services	Heating	Heat Source	Gas Boiler	20kW AVANTA ACE (export)	plastic	6.95	kg/unit	YES	YES	8
Services	Heating	Heat Source	Gas Boiler	20kW AVANTA ACE (Netherlands)	steel	8.3	kg/unit	YES	YES	9
Services	Heating	Heat Source	Gas Boiler	20kW AVANTA ACE (Netherlands)	stainless steel	6.6	kg/unit	YES	YES	9
Services	Heating	Heat Source	Gas Boiler	20kW AVANTA ACE (Netherlands)	aluminium	1.84	kg/unit	YES	YES	9
Services	Heating	Heat Source	Gas Boiler	20kW AVANTA ACE (Netherlands)	copper	1.01	kg/unit	YES	YES	9
Services	Heating	Heat Source	Gas Boiler	20kW AVANTA ACE (Netherlands)	brass	0.14	kg/unit	YES	YES	9
Services	Heating	Heat Source	Gas Boiler	20kW AVANTA ACE (Netherlands)	plastic	6.53	kg/unit	YES	YES	9
Services	Heating	Heat Source	Gas Boiler	20 kW TZERRA Ace-Matic (NL)	steel	8.21	kg/unit	YES	YES	10
Services	Heating	Heat Source	Gas Boiler	20 kW TZERRA Ace-Matic (NL)	stainless steel	6.27	kg/unit	YES	YES	10
Services	Heating	Heat Source	Gas Boiler	20 kW TZERRA Ace-Matic (NL)	aluminium	1.89	kg/unit	YES	YES	10
Services	Heating	Heat Source	Gas Boiler	20 kW TZERRA Ace-Matic (NL)	copper	1.01	kg/unit	YES	YES	10
Services	Heating	Heat Source	Gas Boiler	20 kW TZERRA Ace-Matic (NL)	plastic	6.74	kg/unit	YES	YES	10
Services	Heating	Heat Source	Gas Boiler	24kW TZERRA Ace-Matic (DE)	steel	12.66	kg/unit	YES	YES	11
Services	Heating	Heat Source	Gas Boiler	24kW TZERRA Ace-Matic (DE)	stainless steel	6.44	kg/unit	YES	YES	11
Services	Heating	Heat Source	Gas Boiler	24kW TZERRA Ace-Matic (DE)	aluminium	1.91	kg/unit	YES	YES	11
Services	Heating	Heat Source	Gas Boiler	24kW TZERRA Ace-Matic (DE)	copper	1.01	kg/unit	YES	YES	11
Services	Heating	Heat Source	Gas Boiler	24kW TZERRA Ace-Matic (DE)	plastic	7.33	kg/unit	YES	YES	11
Services	Heating	Heat Source	Gas Boiler	24kW TZERRA Ace-Matic (BE)	steel	12.67	kg/unit	YES	YES	12
Services	Heating	Heat Source	Gas Boiler	24kW TZERRA Ace-Matic (BE)	stainless steel	12.67	kg/unit	YES	YES	12
Services	Heating	Heat Source	Gas Boiler	24kW TZERRA Ace-Matic (BE)	aluminium	6.35	kg/unit	YES	YES	12
Services	Heating	Heat Source	Gas Boiler	24kW TZERRA Ace-Matic (BE)	copper	0.47	kg/unit	YES	YES	12
Services	Heating	Heat Source	Gas Boiler	24kW TZERRA Ace-Matic (BE)	brass	1.62	kg/unit	YES	YES	12
Services	Heating	Heat Source	Gas Boiler	24kW TZERRA Ace-Matic (BE)	plastic	6.94	kg/unit	YES	YES	12
Services	Heating	Heat Source	Gas Boiler	24kW TZERRA Ace-Matic System (BE)	steel	12.67	kg/unit	YES	YES	13
Services	Heating	Heat Source	Gas Boiler	24kW TZERRA Ace-Matic System (BE)	stainless steel	5.53	kg/unit	YES	YES	13
Services	Heating	Heat Source	Gas Boiler	24kW TZERRA Ace-Matic System (BE)	aluminium	1.91	kg/unit	YES	YES	13
Services	Heating	Heat Source	Gas Boiler	24kW TZERRA Ace-Matic System (BE)	copper	0.47	kg/unit	YES	YES	13
Services	Heating	Heat Source	Gas Boiler	24kW TZERRA Ace-Matic System (BE)	brass	1.62	kg/unit	YES	YES	13
Services	Heating	Heat Source	Gas Boiler	24kW TZERRA Ace-Matic System (BE)	plastic	6.93	kg/unit	YES	YES	13
Services	Heating	Heat Source	Gas Boiler	15kW TZERRA Ace-Matic System (DE)	steel	12.68	kg/unit	YES	YES	14
Services	Heating	Heat Source	Gas Boiler	15kW TZERRA Ace-Matic System (DE)	stainless steel	5.32	kg/unit	YES	YES	14
Services	Heating	Heat Source	Gas Boiler	15kW TZERRA Ace-Matic System (DE)	aluminium	1.91	kg/unit	YES	YES	14
Services	Heating	Heat Source	Gas Boiler	15kW TZERRA Ace-Matic System (DE)	copper	0.43	kg/unit	YES	YES	14
Services	Heating	Heat Source	Gas Boiler	15kW TZERRA Ace-Matic System (DE)	brass	1.62	kg/unit	YES	YES	14
Services	Heating	Heat Source	Gas Boiler	15kW TZERRA Ace-Matic System (DE)	plastic	6.94	kg/unit	YES	YES	14
Services	Heating	Heat Source	Gas Boiler	18.5kW Naia 3 micro 25	steel	5.28	kg/unit	YES	YES	15
Services	Heating	Heat Source	Gas Boiler	18.5kW Naia 3 micro 25	stainless steel	5.13	kg/unit	YES	YES	15
Services	Heating	Heat Source	Gas Boiler	18.5kW Naia 3 micro 25	aluminium	1.8	kg/unit	YES	YES	15
Services	Heating	Heat Source	Gas Boiler	18.5kW Naia 3 micro 25	plastic	5.38	kg/unit	YES	YES	15
Services	Heating	Heat Source	Gas Boiler	25kW ThermaFast Condens 31	steel	16.7	kg/unit	YES	YES	16
Services	Heating	Heat Source	Gas Boiler	25kW ThermaFast Condens 31	stainless steel	0.39	kg/unit	YES	YES	16
Services	Heating	Heat Source	Gas Boiler	25kW ThermaFast Condens 31	aluminium	2.49	kg/unit	YES	YES	16
Services	Heating	Heat Source	Gas Boiler	25kW ThermaFast Condens 31	copper	3.65	kg/unit	YES	YES	16
Services	Heating	Heat Source	Gas Boiler	25kW ThermaFast Condens 31	brass	2.88	kg/unit	YES	YES	16
Services	Heating	Heat Source	Gas Boiler	25kW ThermaFast Condens 31	plastic	2.37	kg/unit	YES	YES	16
Services	Heating	Heat Source	Gas Boiler	25kW ecoTEC plus VUW 25/32CS/1-5 (N-FR)	steel	15.56	kg/unit	YES	YES	17
Services	Heating	Heat Source	Gas Boiler	25kW ecoTEC plus VUW 25/32CS/1-5 (N-FR)	stainless steel	9.4	kg/unit	YES	YES	17
Services	Heating	Heat Source	Gas Boiler	25kW ecoTEC plus VUW 25/32CS/1-5 (N-FR)	aluminium	2.45	kg/unit	YES	YES	17
Services	Heating	Heat Source	Gas Boiler	25kW ecoTEC plus VUW 25/32CS/1-5 (N-FR)	copper	2.75	kg/unit	YES	YES	17
Services	Heating	Heat Source	Gas Boiler	25kW ecoTEC plus VUW 25/32CS/1-5 (N-FR)	brass	2.69	kg/unit	YES	YES	17
Services	Heating	Heat Source	Gas Boiler	25kW ecoTEC plus VUW 25/32CS/1-5 (N-FR)	plastic	3.55	kg/unit	YES	YES	17
Services	Heating	Heat Source	Gas Boiler	25kW ecoTEC plus système VU 25 CS/1-5 (N-FR)	steel	15.45	kg/unit	YES	YES	18
Services	Heating	Heat Source	Gas Boiler	25kW ecoTEC plus système VU 25 CS/1-5 (N-FR)	stainless steel	9.41	kg/unit	YES	YES	18
Services	Heating	Heat Source	Gas Boiler	25kW ecoTEC plus système VU 25 CS/1-5 (N-FR)	aluminium	2.47	kg/unit	YES	YES	18
Services	Heating	Heat Source	Gas Boiler	25kW ecoTEC plus système VU 25 CS/1-5 (N-FR)	copper	2.34	kg/unit	YES	YES	18
Services	Heating	Heat Source	Gas Boiler	25kW ecoTEC plus système VU 25 CS/1-5 (N-FR)	brass	2.29	kg/unit	YES	YES	18
Services	Heating	Heat Source	Gas Boiler	25kW ecoTEC plus système VU 25 CS/1-5 (N-FR)	plastic	3.83	kg/unit	YES	YES	18
Services	Heating	Heat Source	Air/Water Heat Pump	4.73kW T.One® AquaAIR (heating, cooling hot water)	steel	117.63	kg/unit	YES	YES	19
Services	Heating	Heat Source	Air/Water Heat Pump	4.73kW T.One® AquaAIR (heating, cooling hot water)	aluminium	8.46	kg/unit	YES	YES	19
Services	Heating	Heat Source	Air/Water Heat Pump	4.73kW T.One® AquaAIR (heating, cooling hot water)	copper	17.91	kg/unit	YES	YES	19
Services	Heating	Heat Source	Air/Water Heat Pump	4.73kW T.One® AquaAIR (heating, cooling hot water)	brass	2.25	kg/unit	YES	YES	19
Services	Heating	Heat Source	Air/Water Heat Pump	4.73kW T.One® AquaAIR (heating, cooling hot water)	plastic	13.12	kg/unit	YES	YES	19
Services	Heating	Heat Source	Air/Water Heat Pump	4.89kW T.One® AquaAIR R32 (heating cooling, hot water)	steel	121.67	kg/unit	YES	YES	20
Services	Heating	Heat Source	Air/Water Heat Pump	4.89kW T.One® AquaAIR R32 (heating cooling, hot water)	aluminium	10.33	kg/unit	YES	YES	20
Services	Heating	Heat Source	Air/Water Heat Pump	4.89kW T.One® AquaAIR R32 (heating cooling, hot water)	copper	23.44	kg/unit	YES	YES	20
Services	Heating	Heat Source	Air/Water Heat Pump	4.89kW T.One® AquaAIR R32 (heating cooling, hot water)	brass	2.25	kg/unit	YES	YES	20
Services	Heating	Heat Source	Air/Water Heat Pump	4.89kW T.One® AquaAIR R32 (heating cooling, hot water)	plastic	16.75	kg/unit	YES	YES	20
Services	Heating	Heat Source	Air/Water Heat Pump	5.65kW Nimbus Pocket/Arianext Lite R32 50 (heating)	steel	39.2	kg/unit	YES	YES	21
Services	Heating	Heat Source	Air/Water Heat Pump	5.65kW Nimbus Pocket/Arianext Lite R32 50 (heating)	stainless steel	2.45	kg/unit	YES	YES	21
Services	Heating	Heat Source	Air/Water Heat Pump	5.65kW Nimbus Pocket/Arianext Lite R32 50 (heating)	aluminium	5.95	kg/unit	YES	YES	21
Services	Heating	Heat Source	Air/Water Heat Pump	5.65kW Nimbus Pocket/Arianext Lite R32 50 (heating)	copper	10.22	kg/unit	YES	YES	21
Services	Heating	Heat Source	Air/Water Heat Pump	5.65kW Nimbus Pocket/Arianext Lite R32 50 (heating)	brass	1.49	kg/unit	YES	YES	21
Services	Heating	Heat Source	Air/Water Heat Pump	5.65kW Nimbus Pocket/Arianext Lite R32 50 (heating)	plastic	6.85	kg/unit	YES	YES	21
Services	Heating	Heat Source	Air/Water Heat Pump	6.05kW Arianext Compact 50S (heating, hot water)	steel	116.69	kg/unit	YES	YES	22
Services	Heating	Heat Source	Air/Water Heat Pump	6.05kW Arianext Compact 50S (heating, hot water)	aluminium	5.24	kg/unit	YES	YES	22
Services	Heating	Heat Source	Air/Water Heat Pump	6.05kW Arianext Compact 50S (heating, hot water)	copper	20.72	kg/unit	YES	YES	22
Services	Heating	Heat Source	Air/Water Heat Pump	6.05kW Arianext Compact 50S (heating, hot water)	brass	2.81	kg/unit	YES	YES	22
Services	Heating	Heat Source	Air/Water Heat Pump	6.05kW Arianext Compact 50S (heating, hot water)	plastic	14.63	kg/unit	YES	YES	22
Services	Heating	Heat Source	Air/Water Heat Pump	6kW BAGUIO 4 ECS - R32 (heating, hot water)	steel	123.9	kg/unit	YES	YES	23
Services	Heating	Heat Source	Air/Water Heat Pump	6kW BAGUIO 4 ECS - R32 (heating, hot water)	stainless steel	11.85	kg/unit	YES	YES	23
Services	Heating	Heat Source	Air/Water Heat Pump	6kW BAGUIO 4 ECS - R32 (heating, hot water)	aluminium	3.11	kg/unit	YES	YES	23
Services	Heating	Heat Source	Air/Water Heat Pump	6kW BAGUIO 4 ECS - R32 (heating, hot water)	copper	13.86	kg/unit	YES	YES	23
Services	Heating	Heat Source	Air/Water Heat Pump	6kW BAGUIO 4 ECS - R32 (heating, hot water)	brass	3.11	kg/unit	YES	YES	23
Services	Heating	Heat Source	Air/Water Heat Pump	6kW BAGUIO 4 ECS - R32 (heating, hot water)	plastic	13.52	kg/unit	YES	YES	23
Services	Heating	Heat Source	Air/Water Heat Pump	6kW BAGUIO 4 - R32 (heating)	steel	66.13	kg/unit	YES	YES	24
Services	Heating	Heat Source	Air/Water Heat Pump	6kW BAGUIO 4 - R32 (heating)	stainless steel	7.37	kg/unit	YES	YES	24
Services	Heating	Heat Source	Air/Water Heat Pump	6kW BAGUIO 4 - R32 (heating)	aluminium	2.9	kg/unit	YES	YES	24
Services	Heating	Heat Source	Air/Water Heat Pump	6kW BAGUIO 4 - R32 (heating)	copper	11.29	kg/unit	YES	YES	24
Services	Heating	Heat Source	Air/Water Heat Pump	6kW BAGUIO 4 - R32 (heating)	brass	1.57	kg/unit	YES	YES	24
Services	Heating	Heat Source	Air/Water Heat Pump	6kW BAGUIO 4 - R32 (heating)	plastic	6.48	kg/unit	YES	YES	24
Services	Heating	Heat Source	Air/Water Heat Pump	6kW HTi70 et DS170C meduim temperature (heating, hot water)	steel	111.13	kg/unit	YES	YES	25
Services	Heating	Heat Source	Air/Water Heat Pump	6kW HTi70 et DS170C meduim temperature (heating, hot water)	aluminium	3.56	kg/unit	YES	YES	25
Services	Heating	Heat Source	Air/Water Heat Pump	6kW HTi70 et DS170C meduim temperature (heating, hot water)	copper	17.46	kg/unit	YES	YES	25
Services	Heating	Heat Source	Air/Water Heat Pump	6kW HTi70 et DS170C meduim temperature (heating, hot water)	plastic	17.95	kg/unit	YES	YES	25
Services	Heating	Heat Source	Air/Water Heat Pump	6kW HTi70 et DS170C low temperature (heating, hot water)	steel	111.13	kg/unit	YES	YES	26
Services	Heating	Heat Source	Air/Water Heat Pump	6kW HTi70 et DS170C low temperature (heating, hot water)	aluminium	3.56	kg/unit	YES	YES	26
Services	Heating	Heat Source	Air/Water Heat Pump	6kW HTi70 et DS170C low temperature (heating, hot water)	copper	17.46	kg/unit	YES	YES	26
Services	Heating	Heat Source	Air/Water Heat Pump	6kW HTi70 et DS170C low temperature (heating, hot water)	plastic	17.95	kg/unit	YES	YES	26
Services	Heating	Heat Source	Air/Water Heat Pump	6.82kW Platinum BC Mural iR32 ALYA WH (heating, cooling)	steel	52.17	kg/unit	YES	YES	27
Services	Heating	Heat Source	Air/Water Heat Pump	6.82kW Platinum BC Mural iR32 ALYA WH (heating, cooling)	aluminium	5.7	kg/unit	YES	YES	27
Services	Heating	Heat Source	Air/Water Heat Pump	6.82kW Platinum BC Mural iR32 ALYA WH (heating, cooling)	copper	10.83	kg/unit	YES	YES	27
Services	Heating	Heat Source	Air/Water Heat Pump	6.82kW Platinum BC Mural iR32 ALYA WH (heating, cooling)	brass	1.86	kg/unit	YES	YES	27
Services	Heating	Heat Source	Air/Water Heat Pump	6.82kW Platinum BC Mural iR32 ALYA WH (heating, cooling)	plastic	12.96	kg/unit	YES	YES	27
Services	Heating	Heat Source	Air/Water Heat Pump	5.7kW Baxi HP40 Monobloc ASHP Baxi Assure HP50 Monobloc ASHP (heating)	steel	58.19	kg/unit	YES	YES	28
Services	Heating	Heat Source	Air/Water Heat Pump	5.7kW Baxi HP40 Monobloc ASHP Baxi Assure HP50 Monobloc ASHP (heating)	aluminium	7.26	kg/unit	YES	YES	28
Services	Heating	Heat Source	Air/Water Heat Pump	5.7kW Baxi HP40 Monobloc ASHP Baxi Assure HP50 Monobloc ASHP (heating)	copper	9.76	kg/unit	YES	YES	28
Services	Heating	Heat Source	Air/Water Heat Pump	5.7kW Baxi HP40 Monobloc ASHP Baxi Assure HP50 Monobloc ASHP (heating)	brass	2.74	kg/unit	YES	YES	28
Services	Heating	Heat Source	Air/Water Heat Pump	5.7kW Baxi HP40 Monobloc ASHP Baxi Assure HP50 Monobloc ASHP (heating)	plastic	6.55	kg/unit	YES	YES	28
Services	Heating	Heat Source	Air/Water Heat Pump	5.7kW BLW Eco-W 6.1 MH (heating)	steel	76.14	kg/unit	YES	YES	29
Services	Heating	Heat Source	Air/Water Heat Pump	5.7kW BLW Eco-W 6.1 MH (heating)	aluminium	7.12	kg/unit	YES	YES	29
Services	Heating	Heat Source	Air/Water Heat Pump	5.7kW BLW Eco-W 6.1 MH (heating)	copper	13.45	kg/unit	YES	YES	29
Services	Heating	Heat Source	Air/Water Heat Pump	5.7kW BLW Eco-W 6.1 MH (heating)	brass	3.92	kg/unit	YES	YES	29
Services	Heating	Heat Source	Air/Water Heat Pump	5.7kW BLW Eco-W 6.1 MH (heating)	plastic	11.39	kg/unit	YES	YES	29
Services	Heating	Heat Source	Air/Water Heat Pump	4.8kW ELGA Ace (heating)	steel	26.47	kg/unit	YES	YES	30
Services	Heating	Heat Source	Air/Water Heat Pump	4.8kW ELGA Ace (heating)	aluminium	2.15	kg/unit	YES	YES	30
Services	Heating	Heat Source	Air/Water Heat Pump	4.8kW ELGA Ace (heating)	copper	5.48	kg/unit	YES	YES	30
Services	Heating	Heat Source	Air/Water Heat Pump	4.8kW ELGA Ace (heating)	brass	1.43	kg/unit	YES	YES	30
Services	Heating	Heat Source	Air/Water Heat Pump	4.8kW ELGA Ace (heating)	plastic	3.74	kg/unit	YES	YES	30
Services	Heating	Heat Source	Air/Water Heat Pump	6kW Daikin Altherma 3 R 180L, refrigerant R-32 (heating, cooling, hot water)	steel	113.96	kg/unit	YES	YES	31
Services	Heating	Heat Source	Air/Water Heat Pump	6kW Daikin Altherma 3 R 180L, refrigerant R-32 (heating, cooling, hot water)	aluminium	6.12	kg/unit	YES	YES	31
Services	Heating	Heat Source	Air/Water Heat Pump	6kW Daikin Altherma 3 R 180L, refrigerant R-32 (heating, cooling, hot water)	copper	26.78	kg/unit	YES	YES	31
Services	Heating	Heat Source	Air/Water Heat Pump	6kW Daikin Altherma 3 R 180L, refrigerant R-32 (heating, cooling, hot water)	brass	4.54	kg/unit	YES	YES	31
Services	Heating	Heat Source	Air/Water Heat Pump	6kW Daikin Altherma 3 R 180L, refrigerant R-32 (heating, cooling, hot water)	plastic	24.57	kg/unit	YES	YES	31
Services	Heating	Heat Source	Air/Water Heat Pump	6kW Daikin Altherma 3 R 230L, refrigerant R-32 (heating, cooling, hot water)	steel	120.6	kg/unit	YES	YES	32
Services	Heating	Heat Source	Air/Water Heat Pump	6kW Daikin Altherma 3 R 230L, refrigerant R-32 (heating, cooling, hot water)	aluminium	6.2	kg/unit	YES	YES	32
Services	Heating	Heat Source	Air/Water Heat Pump	6kW Daikin Altherma 3 R 230L, refrigerant R-32 (heating, cooling, hot water)	copper	28	kg/unit	YES	YES	32
Services	Heating	Heat Source	Air/Water Heat Pump	6kW Daikin Altherma 3 R 230L, refrigerant R-32 (heating, cooling, hot water)	brass	4.96	kg/unit	YES	YES	32
Services	Heating	Heat Source	Air/Water Heat Pump	6kW Daikin Altherma 3 R 230L, refrigerant R-32 (heating, cooling, hot water)	plastic	25.28	kg/unit	YES	YES	32
Services	Heating	Heat Source	Air/Water Heat Pump	5kW ALFEA EXTENSA DUO A.I. R32 (heating, hot water)	steel	114.29	kg/unit	YES	YES	33
Services	Heating	Heat Source	Air/Water Heat Pump	5kW ALFEA EXTENSA DUO A.I. R32 (heating, hot water)	stainless steel	9.11	kg/unit	YES	YES	33
Services	Heating	Heat Source	Air/Water Heat Pump	5kW ALFEA EXTENSA DUO A.I. R32 (heating, hot water)	copper	17.69	kg/unit	YES	YES	33
Services	Heating	Heat Source	Air/Water Heat Pump	5kW ALFEA EXTENSA DUO A.I. R32 (heating, hot water)	plastic	8.66	kg/unit	YES	YES	33
Services	Heating	Heat Source	Air/Water Heat Pump	5kW Alféa Extensa A.I.5 R32 (heating)	steel	36.12	kg/unit	YES	YES	34
Services	Heating	Heat Source	Air/Water Heat Pump	5kW Alféa Extensa A.I.5 R32 (heating)	stainless steel	8.7	kg/unit	YES	YES	34
Services	Heating	Heat Source	Air/Water Heat Pump	5kW Alféa Extensa A.I.5 R32 (heating)	copper	15.23	kg/unit	YES	YES	34
Services	Heating	Heat Source	Air/Water Heat Pump	5kW Alféa Extensa A.I.5 R32 (heating)	plastic	5.09	kg/unit	YES	YES	34
Services	Heating	Heat Source	Air/Water Heat Pump	6kW Hitachi Yutaki S Combi 2.0 (heating, hot water)	steel	31.7	kg/unit	YES	YES	35
Services	Heating	Heat Source	Air/Water Heat Pump	6kW Hitachi Yutaki S Combi 2.0 (heating, hot water)	stainless steel	42.36	kg/unit	YES	YES	35
Services	Heating	Heat Source	Air/Water Heat Pump	6kW Hitachi Yutaki S Combi 2.0 (heating, hot water)	copper	15.38	kg/unit	YES	YES	35
Services	Heating	Heat Source	Air/Water Heat Pump	6kW Hitachi Yutaki S Combi 2.0 (heating, hot water)	plastic	23.37	kg/unit	YES	YES	35
Services	Heating	Heat Source	Air/Water Heat Pump	16kW THERMA V : HM163M U33 (heating, cooling, hot water)	steel	70.31	kg/unit	YES	YES	36
Services	Heating	Heat Source	Air/Water Heat Pump	16kW THERMA V : HM163M U33 (heating, cooling, hot water)	aluminium	9.98	kg/unit	YES	YES	36
Services	Heating	Heat Source	Air/Water Heat Pump	16kW THERMA V : HM163M U33 (heating, cooling, hot water)	copper	31.29	kg/unit	YES	YES	36
Services	Heating	Heat Source	Air/Water Heat Pump	16kW THERMA V : HM163M U33 (heating, cooling, hot water)	plastic	16.72	kg/unit	YES	YES	36
Services	Heating	Heat Source	Air/Water Heat Pump	6kW Therma V IWT : HU091MR U44 & HN0913T NK0 (heating, hot water)	steel	132.71	kg/unit	YES	YES	37
Services	Heating	Heat Source	Air/Water Heat Pump	6kW Therma V IWT : HU091MR U44 & HN0913T NK0 (heating, hot water)	aluminium	4.37	kg/unit	YES	YES	37
Services	Heating	Heat Source	Air/Water Heat Pump	6kW Therma V IWT : HU091MR U44 & HN0913T NK0 (heating, hot water)	copper	14.17	kg/unit	YES	YES	37
Services	Heating	Heat Source	Air/Water Heat Pump	6kW Therma V IWT : HU091MR U44 & HN0913T NK0 (heating, hot water)	plastic	15.03	kg/unit	YES	YES	37
Services	Heating	Heat Source	Air/Water Heat Pump	6.6kW Pompe à chaleur air/eau Eco Inverter Duo 6 200L, fluide R32 (heating, hot water)	steel	85.14	kg/unit	YES	YES	38
Services	Heating	Heat Source	Air/Water Heat Pump	6.6kW Pompe à chaleur air/eau Eco Inverter Duo 6 200L, fluide R32 (heating, hot water)	stainless steel	32.94	kg/unit	YES	YES	38
Services	Heating	Heat Source	Air/Water Heat Pump	6.6kW Pompe à chaleur air/eau Eco Inverter Duo 6 200L, fluide R32 (heating, hot water)	zinc	1.08	kg/unit	YES	YES	38
Services	Heating	Heat Source	Air/Water Heat Pump	6.6kW Pompe à chaleur air/eau Eco Inverter Duo 6 200L, fluide R32 (heating, hot water)	aluminium	3.24	kg/unit	YES	YES	38
Services	Heating	Heat Source	Air/Water Heat Pump	6.6kW Pompe à chaleur air/eau Eco Inverter Duo 6 200L, fluide R32 (heating, hot water)	copper	22.14	kg/unit	YES	YES	38
Services	Heating	Heat Source	Air/Water Heat Pump	6.6kW Pompe à chaleur air/eau Eco Inverter Duo 6 200L, fluide R32 (heating, hot water)	plastic	8.1	kg/unit	YES	YES	38
Services	Heating	Heat Source	Air/Water Heat Pump	10kW Pompe à chaleur air/eau EcoDan Power Inverter 10kW réversible (heating, cooling)	steel	113.67	kg/unit	YES	YES	39
Services	Heating	Heat Source	Air/Water Heat Pump	10kW Pompe à chaleur air/eau EcoDan Power Inverter 10kW réversible (heating, cooling)	aluminium	9.14	kg/unit	YES	YES	39
Services	Heating	Heat Source	Air/Water Heat Pump	10kW Pompe à chaleur air/eau EcoDan Power Inverter 10kW réversible (heating, cooling)	copper	17.29	kg/unit	YES	YES	39
Services	Heating	Heat Source	Air/Water Heat Pump	10kW Pompe à chaleur air/eau EcoDan Power Inverter 10kW réversible (heating, cooling)	plastic	7.69	kg/unit	YES	YES	39
Services	Heating	Heat Source	Air/Water Heat Pump	4.5kW F730 (heating, hot water)	steel	124.24	kg/unit	YES	YES	40
Services	Heating	Heat Source	Air/Water Heat Pump	4.5kW F730 (heating, hot water)	aluminium	13.6	kg/unit	YES	YES	40
Services	Heating	Heat Source	Air/Water Heat Pump	4.5kW F730 (heating, hot water)	copper	15.09	kg/unit	YES	YES	40
Services	Heating	Heat Source	Air/Water Heat Pump	4.5kW F730 (heating, hot water)	brass	5	kg/unit	YES	YES	40
Services	Heating	Heat Source	Air/Water Heat Pump	4.5kW F730 (heating, hot water)	plastic	31.13	kg/unit	YES	YES	40
Services	Heating	Heat Source	Air/Water Heat Pump	6kW Gamme NIBE S735 (heating, hot water)	steel	133.87	kg/unit	YES	YES	41
Services	Heating	Heat Source	Air/Water Heat Pump	6kW Gamme NIBE S735 (heating, hot water)	zinc	4.76	kg/unit	YES	YES	41
Services	Heating	Heat Source	Air/Water Heat Pump	6kW Gamme NIBE S735 (heating, hot water)	aluminium	13.39	kg/unit	YES	YES	41
Services	Heating	Heat Source	Air/Water Heat Pump	6kW Gamme NIBE S735 (heating, hot water)	copper	39.25	kg/unit	YES	YES	41
Services	Heating	Heat Source	Air/Water Heat Pump	6kW Gamme NIBE S735 (heating, hot water)	plastic	16.11	kg/unit	YES	YES	41
Services	Heating	Heat Source	Air/Water Heat Pump	7kW AQUAREA Génération H (heating)	steel	61.64	kg/unit	YES	YES	42
Services	Heating	Heat Source	Air/Water Heat Pump	7kW AQUAREA Génération H (heating)	aluminium	4.01	kg/unit	YES	YES	42
Services	Heating	Heat Source	Air/Water Heat Pump	7kW AQUAREA Génération H (heating)	copper	20.7	kg/unit	YES	YES	42
Services	Heating	Heat Source	Air/Water Heat Pump	7kW AQUAREA Génération H (heating)	plastic	9.95	kg/unit	YES	YES	42
Services	Heating	Heat Source	Air/Water Heat Pump	8kW Aquarea Haute Performance All in One avec ECS intégrée Série K (heating, coling, hot water)	steel	117.29	kg/unit	YES	YES	43
Services	Heating	Heat Source	Air/Water Heat Pump	8kW Aquarea Haute Performance All in One avec ECS intégrée Série K (heating, coling, hot water)	zinc	0.51	kg/unit	YES	YES	43
Services	Heating	Heat Source	Air/Water Heat Pump	8kW Aquarea Haute Performance All in One avec ECS intégrée Série K (heating, coling, hot water)	aluminium	6.08	kg/unit	YES	YES	43
Services	Heating	Heat Source	Air/Water Heat Pump	8kW Aquarea Haute Performance All in One avec ECS intégrée Série K (heating, coling, hot water)	copper	9.63	kg/unit	YES	YES	43
Services	Heating	Heat Source	Air/Water Heat Pump	8kW Aquarea Haute Performance All in One avec ECS intégrée Série K (heating, coling, hot water)	plastic	14.53	kg/unit	YES	YES	43
Services	Heating	Heat Source	Air/Water Heat Pump	5kW GeniaSet Max (heating, hot water)	steel	150.16	kg/unit	YES	YES	44
Services	Heating	Heat Source	Air/Water Heat Pump	5kW GeniaSet Max (heating, hot water)	stainless steel	13.42	kg/unit	YES	YES	44
Services	Heating	Heat Source	Air/Water Heat Pump	5kW GeniaSet Max (heating, hot water)	aluminium	9.03	kg/unit	YES	YES	44
Services	Heating	Heat Source	Air/Water Heat Pump	5kW GeniaSet Max (heating, hot water)	copper	17.6	kg/unit	YES	YES	44
Services	Heating	Heat Source	Air/Water Heat Pump	5kW GeniaSet Max (heating, hot water)	brass	3.1	kg/unit	YES	YES	44
Services	Heating	Heat Source	Air/Water Heat Pump	5kW GeniaSet Max (heating, hot water)	plastic	29.36	kg/unit	YES	YES	44
Services	Heating	Heat Source	Air/Water Heat Pump	4.72kW GeniaAir Split (heating)	steel	66.81	kg/unit	YES	YES	45
Services	Heating	Heat Source	Air/Water Heat Pump	4.72kW GeniaAir Split (heating)	aluminium	7.21	kg/unit	YES	YES	45
Services	Heating	Heat Source	Air/Water Heat Pump	4.72kW GeniaAir Split (heating)	copper	8.91	kg/unit	YES	YES	45
Services	Heating	Heat Source	Air/Water Heat Pump	4.72kW GeniaAir Split (heating)	brass	3.28	kg/unit	YES	YES	45
Services	Heating	Heat Source	Air/Water Heat Pump	4.72kW GeniaAir Split (heating)	plastic	12.97	kg/unit	YES	YES	45
Services	Heating	Heat Source	Air/Water Heat Pump	5.1kW Pompe à chaleur double service résidentielle air/eau (heating, hot water)	steel	155.42	kg/unit	YES	YES	46
Services	Heating	Heat Source	Air/Water Heat Pump	5.1kW Pompe à chaleur double service résidentielle air/eau (heating, hot water)	aluminium	3.37	kg/unit	YES	YES	46
Services	Heating	Heat Source	Air/Water Heat Pump	5.1kW Pompe à chaleur double service résidentielle air/eau (heating, hot water)	copper	23.23	kg/unit	YES	YES	46
Services	Heating	Heat Source	Air/Water Heat Pump	5.1kW Pompe à chaleur double service résidentielle air/eau (heating, hot water)	plastic	21.9	kg/unit	YES	YES	46
Services	Heating	Heat Source	Air/Water Heat Pump	6.4kW Pompes à chaleur air/eau en double service au fluide R32 (heating, hot water)	steel	140.83	kg/unit	YES	YES	47
Services	Heating	Heat Source	Air/Water Heat Pump	6.4kW Pompes à chaleur air/eau en double service au fluide R32 (heating, hot water)	aluminium	4.3	kg/unit	YES	YES	47
Services	Heating	Heat Source	Air/Water Heat Pump	6.4kW Pompes à chaleur air/eau en double service au fluide R32 (heating, hot water)	copper	21.8	kg/unit	YES	YES	47
Services	Heating	Heat Source	Air/Water Heat Pump	6.4kW Pompes à chaleur air/eau en double service au fluide R32 (heating, hot water)	brass	3.23	kg/unit	YES	YES	47
Services	Heating	Heat Source	Air/Water Heat Pump	6.4kW Pompes à chaleur air/eau en double service au fluide R32 (heating, hot water)	glass	0.86	kg/unit	YES	YES	47
Services	Heating	Heat Source	Air/Water Heat Pump	6.4kW Pompes à chaleur air/eau en double service au fluide R32 (heating, hot water)	plastic	15.82	kg/unit	YES	YES	47
Services	Heating	Heat Source	Air/Water Heat Pump	8kW VITOCAL 100-S (heating)	steel	47.67	kg/unit	YES	YES	48
Services	Heating	Heat Source	Air/Water Heat Pump	8kW VITOCAL 100-S (heating)	stainless steel	37.52	kg/unit	YES	YES	48
Services	Heating	Heat Source	Air/Water Heat Pump	8kW VITOCAL 100-S (heating)	aluminium	8.19	kg/unit	YES	YES	48
Services	Heating	Heat Source	Air/Water Heat Pump	8kW VITOCAL 100-S (heating)	copper	16.07	kg/unit	YES	YES	48
Services	Heating	Heat Source	Air/Water Heat Pump	8kW VITOCAL 100-S (heating)	brass	0.26	kg/unit	YES	YES	48
Services	Heating	Heat Source	Air/Water Heat Pump	8kW VITOCAL 100-S (heating)	plastic	8.77	kg/unit	YES	YES	48
Services	Heating	Heat Source	Air/Water Heat Pump	8kW VITOCAL 111-S (heating, hot water)	steel	151.72	kg/unit	YES	YES	49
Services	Heating	Heat Source	Air/Water Heat Pump	8kW VITOCAL 111-S (heating, hot water)	stainless steel	42.86	kg/unit	YES	YES	49
Services	Heating	Heat Source	Air/Water Heat Pump	8kW VITOCAL 111-S (heating, hot water)	aluminium	8.05	kg/unit	YES	YES	49
Services	Heating	Heat Source	Air/Water Heat Pump	8kW VITOCAL 111-S (heating, hot water)	copper	20.43	kg/unit	YES	YES	49
Services	Heating	Heat Source	Air/Water Heat Pump	8kW VITOCAL 111-S (heating, hot water)	plastic	12.31	kg/unit	YES	YES	49
Services	Heating	Emitter	Hot Water Radiator	1kW Classic Hot Water Radiator Range	steel	20.16	kg/unit	YES	YES	50
Services	Heating	Emitter	Hot Water Radiator	1kW Galant Hot Water Radiator Range	steel	29.96	kg/unit	YES	YES	51
Services	Heating	Emitter	Hot Water Radiator	1kW Therma Hot Water Radiator Range	steel	25.06	kg/unit	YES	YES	52
Services	Heating	Emitter	Hot Water Radiator	1kW Thermopanel V4	steel	20.44	kg/unit	YES	YES	53
Services	Heating	Emitter	Hot Water Radiator	1kW Thermopanel V4	brass	0.09	kg/unit	YES	YES	53
Services	Heating	Emitter	Hot Water Radiator	1kW Thermopanel V4	plastic	0.11	kg/unit	YES	YES	53
Services	Heating	Emitter	Hot Water Radiator	1kW Fassane Pack double à ailettes	steel	31.24	kg/unit	YES	YES	54
Services	Heating	Emitter	Hot Water Radiator	1kW Fassane Pack double à ailettes	brass	0.1	kg/unit	YES	YES	54
Services	Heating	Emitter	Hot Water Radiator	1kW Fassane Pack double à ailettes	plastic	0.24	kg/unit	YES	YES	54
Services	Heating	Emitter	Electric Radiator	1kW Myneo Fluid	steel	1.43	kg/unit	YES	YES	55
Services	Heating	Emitter	Electric Radiator	1kW Myneo Fluid	aluminium	9.47	kg/unit	YES	YES	55
Services	Heating	Emitter	Electric Radiator	1kW Myneo Fluid	brass	0.047	kg/unit	YES	YES	55
Services	Heating	Emitter	Electric Radiator	1kW Myneo Fluid	plastic	0.84	kg/unit	YES	YES	55
Services	Heating	Emitter	Electric Radiator	1kW Optalys & Aloé Digital	steel	3.2	kg/unit	YES	YES	56
Services	Heating	Emitter	Electric Radiator	1kW Optalys & Aloé Digital	aluminium	7.98	kg/unit	YES	YES	56
Services	Heating	Emitter	Electric Radiator	1kW Optalys & Aloé Digital	copper	0.015	kg/unit	YES	YES	56
Services	Heating	Emitter	Electric Radiator	1kW Optalys & Aloé Digital	plastic	0.29	kg/unit	YES	YES	56
Services	Heating	Emitter	Electric Radiator	1kW Gamme Efluid	steel	1.19	kg/unit	YES	YES	57
Services	Heating	Emitter	Electric Radiator	1kW Gamme Efluid	aluminium	8.04	kg/unit	YES	YES	57
Services	Heating	Emitter	Electric Radiator	1kW Gamme Efluid	plastic	1.46	kg/unit	YES	YES	57
Services	Heating	Emitter	Electric Radiator	1kW Gamme Efluid	copper	0.13	kg/unit	YES	YES	57
Services	Heating	Emitter	Electric Radiator	1kW Gamme radiateurs verticaux VELKIS	steel	6.63	kg/unit	YES	YES	58
Services	Heating	Emitter	Electric Radiator	1kW Gamme radiateurs verticaux VELKIS	aluminium	8.26	kg/unit	YES	YES	58
Services	Heating	Emitter	Electric Radiator	1kW Gamme radiateurs verticaux VELKIS	plastic	0.3	kg/unit	YES	YES	58
Services	Heating	Emitter	Electric Radiator	1kW Gamme radiateurs verticaux VELKIS	copper	0.24	kg/unit	YES	YES	58
Services	Heating	Emitter	Electric Radiator	1kW Gamme TEKO	steel	1.19	kg/unit	YES	YES	59
Services	Heating	Emitter	Electric Radiator	1kW Gamme TEKO	aluminium	8.04	kg/unit	YES	YES	59
Services	Heating	Emitter	Electric Radiator	1kW Gamme TEKO	plastic	1.46	kg/unit	YES	YES	59
Services	Heating	Emitter	Electric Radiator	1kW Gamme TEKO	copper	0.13	kg/unit	YES	YES	59
Services	Heating	Emitter	Electric Radiator	1kW Radiateur NARIA NKF15	steel	1.42	kg/unit	YES	YES	60
Services	Heating	Emitter	Electric Radiator	1kW Radiateur NARIA NKF15	stainless steel	1.37	kg/unit	YES	YES	60
Services	Heating	Emitter	Electric Radiator	1kW Radiateur NARIA NKF15	aluminium	5.41	kg/unit	YES	YES	60
Services	Heating	Emitter	Electric Radiator	1kW Radiateur NARIA NKF15	copper	0.075	kg/unit	YES	YES	60
Services	Heating	Emitter	Electric Radiator	1kW Radiateur NARIA NKF15	plastic	1.12	kg/unit	YES	YES	60
Services	Heating	Emitter	Electric Radiator	1kW Radiateur FSC2	steel	1.42	kg/unit	YES	YES	61
Services	Heating	Emitter	Electric Radiator	1kW Radiateur FSC2	stainless steel	1.37	kg/unit	YES	YES	61
Services	Heating	Emitter	Electric Radiator	1kW Radiateur FSC2	aluminium	5.41	kg/unit	YES	YES	61
Services	Heating	Emitter	Electric Radiator	1kW Radiateur FSC2	copper	0.075	kg/unit	YES	YES	61
Services	Heating	Emitter	Electric Radiator	1kW Radiateur FSC2	plastic	1.12	kg/unit	YES	YES	61
Services	Heating	Emitter	Electric Radiator	1kW Radiateur AGILIA PI	steel	4.38	kg/unit	YES	YES	62
Services	Heating	Emitter	Electric Radiator	1kW Radiateur AGILIA PI	stainless steel	0.083	kg/unit	YES	YES	62
Services	Heating	Emitter	Electric Radiator	1kW Radiateur AGILIA PI	aluminium	0.14	kg/unit	YES	YES	62
Services	Heating	Emitter	Electric Radiator	1kW Radiateur AGILIA PI	copper	0.092	kg/unit	YES	YES	62
Services	Heating	Emitter	Electric Radiator	1kW Radiateur AGILIA PI	plastic	0.35	kg/unit	YES	YES	62
Services	Heating	Emitter	Electric Radiator	1.5kW INGENIO V	steel	15.66	kg/unit	YES	YES	63
Services	Heating	Emitter	Electric Radiator	1.5kW INGENIO V	stainless steel	0.7	kg/unit	YES	YES	63
Services	Heating	Emitter	Electric Radiator	1.5kW INGENIO V	aluminium	0.42	kg/unit	YES	YES	63
Services	Heating	Emitter	Electric Radiator	1.5kW INGENIO V	copper	0.04	kg/unit	YES	YES	63
Services	Heating	Emitter	Electric Radiator	1.5kW INGENIO V	plastic	1.25	kg/unit	YES	YES	63
Services	Heating	Emitter	Electric Radiator	1kW INGENIO H	steel	4.02	kg/unit	YES	YES	64
Services	Heating	Emitter	Electric Radiator	1kW INGENIO H	stainless steel	0.4	kg/unit	YES	YES	64
Services	Heating	Emitter	Electric Radiator	1kW INGENIO H	aluminium	0.072	kg/unit	YES	YES	64
Services	Heating	Emitter	Electric Radiator	1kW INGENIO H	copper	0.13	kg/unit	YES	YES	64
Services	Heating	Emitter	Electric Radiator	1kW INGENIO H	plastic	0.6	kg/unit	YES	YES	64
Services	Heating	Emitter	Electric Radiator	1kW Etic Compact Horizontal	steel	5.94	kg/unit	YES	YES	65
Services	Heating	Emitter	Electric Radiator	1kW Etic Compact Horizontal	aluminium	0.12	kg/unit	YES	YES	65
Services	Heating	Emitter	Electric Radiator	1kW Etic Compact Horizontal	copper	0.059	kg/unit	YES	YES	65
Services	Heating	Emitter	Electric Radiator	1kW Etic Compact Horizontal	plastic	0.54	kg/unit	YES	YES	65
Services	Heating	Emitter	Electric Radiator	1kW Noveo 4 Horizontal	steel	6.72	kg/unit	YES	YES	66
Services	Heating	Emitter	Electric Radiator	1kW Noveo 4 Horizontal	aluminium	0.75	kg/unit	YES	YES	66
Services	Heating	Emitter	Electric Radiator	1kW Noveo 4 Horizontal	copper	0.049	kg/unit	YES	YES	66
Services	Heating	Emitter	Electric Radiator	1kW Noveo 4 Horizontal	plastic	0.98	kg/unit	YES	YES	66
Services	Heating	Emitter	Electric Radiator	1kW Noveo 4 Vertical	steel	9.27	kg/unit	YES	YES	67
Services	Heating	Emitter	Electric Radiator	1kW Noveo 4 Vertical	aluminium	1.09	kg/unit	YES	YES	67
Services	Heating	Emitter	Electric Radiator	1kW Noveo 4 Vertical	copper	0.079	kg/unit	YES	YES	67
Services	Heating	Emitter	Electric Radiator	1kW Noveo 4 Vertical	plastic	0.94	kg/unit	YES	YES	67
Services	Heating	Emitter	Electric Radiator	1kW Sensual Horizontal	steel	10.54	kg/unit	YES	YES	68
Services	Heating	Emitter	Electric Radiator	1kW Sensual Horizontal	aluminium	0.76	kg/unit	YES	YES	68
Services	Heating	Emitter	Electric Radiator	1kW Sensual Horizontal	copper	0.056	kg/unit	YES	YES	68
Services	Heating	Emitter	Electric Radiator	1kW Sensual Horizontal	plastic	0.64	kg/unit	YES	YES	68
Services	Heating	Emitter	Electric Radiator	1kW Sensual Vertical	steel	15.41	kg/unit	YES	YES	69
Services	Heating	Emitter	Electric Radiator	1kW Sensual Vertical	aluminium	1.1	kg/unit	YES	YES	69
Services	Heating	Emitter	Electric Radiator	1kW Sensual Vertical	copper	0.089	kg/unit	YES	YES	69
Services	Heating	Emitter	Electric Radiator	1kW Sensual Vertical	plastic	0.65	kg/unit	YES	YES	69
Services	Heating	Emitter	Electric Radiator	1kW Etic Slim Horizontal	steel	13.4	kg/unit	YES	YES	70
Services	Heating	Emitter	Electric Radiator	1kW Etic Slim Horizontal	aluminium	0.089	kg/unit	YES	YES	70
Services	Heating	Emitter	Electric Radiator	1kW Etic Slim Horizontal	copper	0.079	kg/unit	YES	YES	70
Services	Heating	Emitter	Electric Radiator	1kW Etic Slim Horizontal	plastic	0.65	kg/unit	YES	YES	70
Services	Heating	Emitter	Electric Radiator	1.5kW Etic Vertical	steel	19.75	kg/unit	YES	YES	71
Services	Heating	Emitter	Electric Radiator	1.5kW Etic Vertical	aluminium	0.092	kg/unit	YES	YES	71
Services	Heating	Emitter	Electric Radiator	1.5kW Etic Vertical	copper	0.713	kg/unit	YES	YES	71
Services	Heating	Emitter	Electric Radiator	1.5kW Etic Vertical	plastic	0.57	kg/unit	YES	YES	71
Services	Heating	Emitter	Electric Radiator	1kW Calidoo Horizontal	steel	17.78	kg/unit	YES	YES	72
Services	Heating	Emitter	Electric Radiator	1kW Calidoo Horizontal	aluminium	0.14	kg/unit	YES	YES	72
Services	Heating	Emitter	Electric Radiator	1kW Calidoo Horizontal	copper	0.091	kg/unit	YES	YES	72
Services	Heating	Emitter	Electric Radiator	1kW Calidoo Horizontal	plastic	1.13	kg/unit	YES	YES	72
Services	Heating	Emitter	Electric Radiator	1kW Calidoo Bas	steel	14.39	kg/unit	YES	YES	73
Services	Heating	Emitter	Electric Radiator	1kW Calidoo Bas	aluminium	0.14	kg/unit	YES	YES	73
Services	Heating	Emitter	Electric Radiator	1kW Calidoo Bas	copper	0.1	kg/unit	YES	YES	73
Services	Heating	Emitter	Electric Radiator	1kW Calidoo Bas	plastic	1.04	kg/unit	YES	YES	73
Services	Heating	Emitter	Electric Radiator	1.5kW Calidoo Vertical	steel	15.88	kg/unit	YES	YES	74
Services	Heating	Emitter	Electric Radiator	1.5kW Calidoo Vertical	aluminium	0.097	kg/unit	YES	YES	74
Services	Heating	Emitter	Electric Radiator	1.5kW Calidoo Vertical	copper	0.089	kg/unit	YES	YES	74
Services	Heating	Emitter	Electric Radiator	1.5kW Calidoo Vertical	plastic	0.88	kg/unit	YES	YES	74
Services	Heating	Emitter	Electric Radiator	1kW Axoo Horizontal	steel	15.79	kg/unit	YES	YES	75
Services	Heating	Emitter	Electric Radiator	1kW Axoo Horizontal	aluminium	0.13	kg/unit	YES	YES	75
Services	Heating	Emitter	Electric Radiator	1kW Axoo Horizontal	copper	0.047	kg/unit	YES	YES	75
Services	Heating	Emitter	Electric Radiator	1kW Axoo Horizontal	plastic	0.57	kg/unit	YES	YES	75
Services	Heating	Emitter	Electric Radiator	1kW Axoo Bas	steel	19.35	kg/unit	YES	YES	76
Services	Heating	Emitter	Electric Radiator	1kW Axoo Bas	aluminium	0.15	kg/unit	YES	YES	76
Services	Heating	Emitter	Electric Radiator	1kW Axoo Bas	copper	0.04	kg/unit	YES	YES	76
Services	Heating	Emitter	Electric Radiator	1kW Axoo Bas	plastic	0.89	kg/unit	YES	YES	76
Services	Heating	Emitter	Electric Radiator	1kW Axoo Vertical	steel	23.39	kg/unit	YES	YES	77
Services	Heating	Emitter	Electric Radiator	1kW Axoo Vertical	aluminium	0.13	kg/unit	YES	YES	77
Services	Heating	Emitter	Electric Radiator	1kW Axoo Vertical	copper	0.11	kg/unit	YES	YES	77
Services	Heating	Emitter	Electric Radiator	1kW Axoo Vertical	plastic	0.92	kg/unit	YES	YES	77
Services	Heating	Emitter	Electric Radiator	1kW Beladoo Horizontal	steel	15.16	kg/unit	YES	YES	78
Services	Heating	Emitter	Electric Radiator	1kW Beladoo Horizontal	aluminium	0.13	kg/unit	YES	YES	78
Services	Heating	Emitter	Electric Radiator	1kW Beladoo Horizontal	copper	0.052	kg/unit	YES	YES	78
Services	Heating	Emitter	Electric Radiator	1kW Beladoo Horizontal	plastic	0.78	kg/unit	YES	YES	78
Services	Heating	Emitter	Electric Radiator	1kW Beladoo Bas	steel	14.71	kg/unit	YES	YES	79
Services	Heating	Emitter	Electric Radiator	1kW Beladoo Bas	aluminium	0.136	kg/unit	YES	YES	79
Services	Heating	Emitter	Electric Radiator	1kW Beladoo Bas	copper	0.049	kg/unit	YES	YES	79
Services	Heating	Emitter	Electric Radiator	1kW Beladoo Bas	plastic	0.83	kg/unit	YES	YES	79
Services	Heating	Emitter	Electric Radiator	1kW Beladoo Vertical	steel	14.62	kg/unit	YES	YES	80
Services	Heating	Emitter	Electric Radiator	1kW Beladoo Vertical	aluminium	0.17	kg/unit	YES	YES	80
Services	Heating	Emitter	Electric Radiator	1kW Beladoo Vertical	copper	0.043	kg/unit	YES	YES	80
Services	Heating	Emitter	Electric Radiator	1kW Beladoo Vertical	plastic	1.12	kg/unit	YES	YES	80
Services	Heating	Emitter	Electric Radiator	1kW Beladoo Plinthe	steel	17.04	kg/unit	YES	YES	81
Services	Heating	Emitter	Electric Radiator	1kW Beladoo Plinthe	aluminium	0.14	kg/unit	YES	YES	81
Services	Heating	Emitter	Electric Radiator	1kW Beladoo Plinthe	copper	0.059	kg/unit	YES	YES	81
Services	Heating	Emitter	Electric Radiator	1kW Beladoo Plinthe	plastic	0.96	kg/unit	YES	YES	81
Services	Heating	Emitter	Electric Radiator	1kW R21 D	steel	12.81	kg/unit	YES	YES	82
Services	Heating	Emitter	Electric Radiator	1kW R21 D	aluminium	0.76	kg/unit	YES	YES	82
Services	Heating	Emitter	Electric Radiator	1kW R21 D	copper	0.045	kg/unit	YES	YES	82
Services	Heating	Emitter	Electric Radiator	1kW R21 D	plastic	0.8	kg/unit	YES	YES	82
Services	Heating	Emitter	Electric Radiator	1kW Axino / Radiaflo	steel	3.47	kg/unit	YES	YES	83
Services	Heating	Emitter	Electric Radiator	1kW Axino / Radiaflo	aluminium	5.45	kg/unit	YES	YES	83
Services	Heating	Emitter	Electric Radiator	1kW Axino / Radiaflo	copper	0.028	kg/unit	YES	YES	83
Services	Heating	Emitter	Electric Radiator	1kW Axino / Radiaflo	plastic	0.23	kg/unit	YES	YES	83
Services	Heating	Emitter	Electric Radiator	1kW RFD-3EO	steel	3.47	kg/unit	YES	YES	84
Services	Heating	Emitter	Electric Radiator	1kW RFD-3EO	aluminium	5.45	kg/unit	YES	YES	84
Services	Heating	Emitter	Electric Radiator	1kW RFD-3EO	copper	0.03	kg/unit	YES	YES	84
Services	Heating	Emitter	Electric Radiator	1kW RFD-3EO	plastic	0.25	kg/unit	YES	YES	84
Services	Heating	Emitter	Electric Radiator	1kW Chamane	steel	14.46	kg/unit	YES	YES	85
Services	Heating	Emitter	Electric Radiator	1kW Chamane	aluminium	0.053	kg/unit	YES	YES	85
Services	Heating	Emitter	Electric Radiator	1kW Chamane	copper	0.04	kg/unit	YES	YES	85
Services	Heating	Emitter	Electric Radiator	1kW Chamane	plastic	0.27	kg/unit	YES	YES	85
Services	Heating	Emitter	Electric Radiator	1kW Oslo 2 / RAD néo	steel	4.09	kg/unit	YES	YES	86
Services	Heating	Emitter	Electric Radiator	1kW Oslo 2 / RAD néo	aluminium	0.059	kg/unit	YES	YES	86
Services	Heating	Emitter	Electric Radiator	1kW Oslo 2 / RAD néo	copper	0.03	kg/unit	YES	YES	86
Services	Heating	Emitter	Electric Radiator	1kW Oslo 2 / RAD néo	plastic	0.16	kg/unit	YES	YES	86
Services	Heating	Emitter	Electric Radiator	1kW RADIATEUR VOLGA PLUS	steel	0.85	kg/unit	YES	YES	87
Services	Heating	Emitter	Electric Radiator	1kW RADIATEUR VOLGA PLUS	stainless steel	0.5	kg/unit	YES	YES	87
Services	Heating	Emitter	Electric Radiator	1kW RADIATEUR VOLGA PLUS	aluminium	8.24	kg/unit	YES	YES	87
Services	Heating	Emitter	Electric Radiator	1kW RADIATEUR VOLGA PLUS	plastic	2.05	kg/unit	YES	YES	87
Services	Heating	Emitter	Electric Radiator	1kW RADIATEUR VOLGA PLUS	copper	0.08	kg/unit	YES	YES	87
Services	Heating	Storage	Storage tank	300L Atlantic Mileo + 300	stainless steel	34.55	kg/unit	YES	YES	88
Services	Heating	Storage	Storage tank	300L Atlantic Mileo + 300	plastic	31.1	kg/unit	YES	YES	88
Services	Heating	Storage	Storage tank	300L ACV SMART E	steel	36.05	kg/unit	YES	YES	89
Services	Heating	Storage	Storage tank	300L ACV SMART E	stainless steel	18.8	kg/unit	YES	YES	89
Services	Heating	Storage	Storage tank	300L ACV SMART E	plastic	17.53	kg/unit	YES	YES	89
Services	Heating	Storage	Storage tank	606L HRI 600	steel	111.9	kg/unit	YES	YES	90
Services	Heating	Storage	Storage tank	606L HRI 600	stainless steel	76.9	kg/unit	YES	YES	90
Services	Heating	Storage	Storage tank	606L HRI 600	brass	0.96	kg/unit	YES	YES	90
Services	Heating	Storage	Storage tank	606L HRI 600	plastic	6.99	kg/unit	YES	YES	90
Services	Heating	Transportation	Heating pipe	15mm Copper Pipe 0.7mm thickness	copper	0.28	kg/m	YES	YES	91
Services	Heating	Transportation	Heating pipe	22mm Copper Pipe 0.9mm thickness	copper	0.53	kg/m	YES	YES	91
Services	Heating	Transportation	Heating pipe	15mm Plastic Pipe 1.5mm thickness	plastic	0.085	kg/m	YES	YES	92
Services	Heating	Transportation	Heating pipe	22mm Plastic Pipe 2mm thickness	plastic	0.088	kg/m	YES	YES	92
Services	Ventilation	Extraction	Air Outlet	Air Extraction ventilator	plastic	0.418	kg/unit	YES	YES	93
Services	Ventilation	Extraction	Air Outlet	Air Extraction ventilator	copper	0.146	kg/unit	YES	YES	93
Services	Electrical	Wiring	Electrical cable	1.5mm2 twin and earth cable	copper	0.067	kg/m	YES	YES	94
Services	Electrical	Wiring	Electrical cable	1.5mm2 twin and earth cable	plastic	0.048	kg/m	YES	YES	94
Services	Electrical	Wiring	Electrical cable	2.5mm2 twin and earth cable	copper	0.099	kg/m	YES	YES	94
Services	Electrical	Wiring	Electrical cable	2.5mm2 twin and earth cable	plastic	0.071	kg/m	YES	YES	94
Services	Heating	Emitter	Underfloor heating	T45, PERT EVOH, cabinet and manifolds	polystyrene	1.44	kg/m2 (floor area)		YES	95
Services	Heating	Emitter	Underfloor heating	T45, PERT EVOH, cabinet and manifolds	polyethylene	0.706	kg/m2 (floor area)		YES	95
Services	Heating	Emitter	Underfloor heating	T45, PERT EVOH, cabinet and manifolds	additives	0.0142	kg/m2 (floor area)		YES	95
Services	Heating	Emitter	Underfloor heating	T45, PERT EVOH, cabinet and manifolds	steel	0.148	kg/m2 (floor area)		YES	95
Services	Heating	Emitter	Underfloor heating	T45, PERT EVOH, cabinet and manifolds	painting	0.013	kg/m2 (floor area)		YES	95
Services	Heating	Emitter	Underfloor heating	T45, PERT EVOH, cabinet and manifolds	copper	0.00284	kg/m2 (floor area)		YES	95
Services	Heating	Emitter	Underfloor heating	T45, PERT EVOH, cabinet and manifolds	plastic	0.000342	kg/m2 (floor area)		YES	95
Services	Heating	Emitter	Underfloor heating	T45, PERT-AL-PERT cabinet and manifolds	polystyrene	1.44	kg/m2 (floor area)		YES	95
Services	Heating	Emitter	Underfloor heating	T45, PERT-AL-PERT cabinet and manifolds	polyethylene	0.95	kg/m2 (floor area)		YES	95
Services	Heating	Emitter	Underfloor heating	T45, PERT-AL-PERT cabinet and manifolds	additives	0.00674	kg/m2 (floor area)		YES	95
Services	Heating	Emitter	Underfloor heating	T45, PERT-AL-PERT cabinet and manifolds	aluminium	0.39	kg/m2 (floor area)		YES	95
Services	Heating	Emitter	Underfloor heating	T45, PERT-AL-PERT cabinet and manifolds	adhesives	0.045	kg/m2 (floor area)		YES	95
Services	Heating	Emitter	Underfloor heating	T45, PERT-AL-PERT cabinet and manifolds	steel	0.148	kg/m2 (floor area)		YES	95
Services	Heating	Emitter	Underfloor heating	T45, PERT-AL-PERT cabinet and manifolds	painting	0.013	kg/m2 (floor area)		YES	95
Services	Heating	Emitter	Underfloor heating	T45, PERT-AL-PERT cabinet and manifolds	copper	0.00284	kg/m2 (floor area)		YES	95
Services	Heating	Emitter	Underfloor heating	T45, PERT-AL-PERT cabinet and manifolds	plastic	0.000342	kg/m2 (floor area)		YES	95
Services	Heating	Emitter	Underfloor heating	T45, PEX-a EVOH cabinet and manifolds	polystyrene	1.44	kg/m2 (floor area)		YES	95
Services	Heating	Emitter	Underfloor heating	T45, PEX-a EVOH cabinet and manifolds	polyethylene	0.787	kg/m2 (floor area)		YES	95
Services	Heating	Emitter	Underfloor heating	T45, PEX-a EVOH cabinet and manifolds	additives	0.0151	kg/m2 (floor area)		YES	95
Services	Heating	Emitter	Underfloor heating	T45, PEX-a EVOH cabinet and manifolds	adhesives	0.00795	kg/m2 (floor area)		YES	95
Services	Heating	Emitter	Underfloor heating	T45, PEX-a EVOH cabinet and manifolds	steel	0.148	kg/m2 (floor area)		YES	95
Services	Heating	Emitter	Underfloor heating	T45, PEX-a EVOH cabinet and manifolds	painting	0.013	kg/m2 (floor area)		YES	95
Services	Heating	Emitter	Underfloor heating	T45, PEX-a EVOH cabinet and manifolds	copper	0.00284	kg/m2 (floor area)		YES	95
Services	Heating	Emitter	Underfloor heating	T45, PEX-a EVOH cabinet and manifolds	plastic	0.000342	kg/m2 (floor area)		YES	95
Services	Heating	Emitter	Underfloor heating	T55 TAC, PERT EVOH, cabinet and manifolds	polystyrene	1.67	kg/m2 (floor area)		YES	95
Services	Heating	Emitter	Underfloor heating	T55 TAC, PERT EVOH, cabinet and manifolds	polyethylene	0.706	kg/m2 (floor area)		YES	95
Services	Heating	Emitter	Underfloor heating	T55 TAC, PERT EVOH, cabinet and manifolds	additives	0.0142	kg/m2 (floor area)		YES	95
Services	Heating	Emitter	Underfloor heating	T55 TAC, PERT EVOH, cabinet and manifolds	steel	0.148	kg/m2 (floor area)		YES	95
Services	Heating	Emitter	Underfloor heating	T55 TAC, PERT EVOH, cabinet and manifolds	painting	0.013	kg/m2 (floor area)		YES	95
Services	Heating	Emitter	Underfloor heating	T55 TAC, PERT EVOH, cabinet and manifolds	copper	0.00284	kg/m2 (floor area)		YES	95
Services	Heating	Emitter	Underfloor heating	T55 TAC, PERT EVOH, cabinet and manifolds	plastic	0.000342	kg/m2 (floor area)		YES	95
Services	Heating	Emitter	Underfloor heating	T55 TAC, PERT-AL-PERT cabinet and manifolds	polystyrene	1.67	kg/m2 (floor area)		YES	95
Services	Heating	Emitter	Underfloor heating	T55 TAC, PERT-AL-PERT cabinet and manifolds	polyethylene	0.95	kg/m2 (floor area)		YES	95
Services	Heating	Emitter	Underfloor heating	T55 TAC, PERT-AL-PERT cabinet and manifolds	additives	0.00674	kg/m2 (floor area)		YES	95
Services	Heating	Emitter	Underfloor heating	T55 TAC, PERT-AL-PERT cabinet and manifolds	aluminium	0.39	kg/m2 (floor area)		YES	95
Services	Heating	Emitter	Underfloor heating	T55 TAC, PERT-AL-PERT cabinet and manifolds	adhesives	0.045	kg/m2 (floor area)		YES	95
Services	Heating	Emitter	Underfloor heating	T55 TAC, PERT-AL-PERT cabinet and manifolds	steel	0.148	kg/m2 (floor area)		YES	95
Services	Heating	Emitter	Underfloor heating	T55 TAC, PERT-AL-PERT cabinet and manifolds	painting	0.013	kg/m2 (floor area)		YES	95
Services	Heating	Emitter	Underfloor heating	T55 TAC, PERT-AL-PERT cabinet and manifolds	copper	0.00284	kg/m2 (floor area)		YES	95
Services	Heating	Emitter	Underfloor heating	T55 TAC, PERT-AL-PERT cabinet and manifolds	plastic	0.000342	kg/m2 (floor area)		YES	95
Services	Heating	Emitter	Underfloor heating	T55 TAC, PEX-a EVOH cabinet and manifolds	polystyrene	1.67	kg/m2 (floor area)		YES	95
Services	Heating	Emitter	Underfloor heating	T55 TAC, PEX-a EVOH cabinet and manifolds	polyethylene	0.787	kg/m2 (floor area)		YES	95
Services	Heating	Emitter	Underfloor heating	T55 TAC, PEX-a EVOH cabinet and manifolds	additives	0.0151	kg/m2 (floor area)		YES	95
Services	Heating	Emitter	Underfloor heating	T55 TAC, PEX-a EVOH cabinet and manifolds	adhesives	0.00795	kg/m2 (floor area)		YES	95
Services	Heating	Emitter	Underfloor heating	T55 TAC, PEX-a EVOH cabinet and manifolds	steel	0.148	kg/m2 (floor area)		YES	95
Services	Heating	Emitter	Underfloor heating	T55 TAC, PEX-a EVOH cabinet and manifolds	painting	0.013	kg/m2 (floor area)		YES	95
Services	Heating	Emitter	Underfloor heating	T55 TAC, PEX-a EVOH cabinet and manifolds	copper	0.00284	kg/m2 (floor area)		YES	95
Services	Heating	Emitter	Underfloor heating	T55 TAC, PEX-a EVOH cabinet and manifolds	plastic	0.000342	kg/m2 (floor area)		YES	95
Services	Plumbing	Transportation	Plumbing pipe	110mm Plastic Soil Pipe 4.2 mm thickness	plastic	1.857	kg/m	YES	YES	96
Services	Plumbing	Transportation	Plumbing pipe	160mm Plastic Soil Pipe 6.2 mm thickness	plastic	3.984	kg/m	YES	YES	96
Services	Plumbing	Transportation	Plumbing pipe	32mm Plastic Waste Pipe 1.8 mm thickness	plastic	0.227	kg/m	YES	YES	96
Services	Plumbing	Transportation	Plumbing pipe	40mm Plastic Waste Pipe 1.9 mm thickness	plastic	0.302	kg/m	YES	YES	96
Services	Plumbing	Transportation	Plumbing pipe	50mm Plastic Waste Pipe 2.4 mm thickness	plastic	0.477	kg/m	YES	YES	96
References
	1	Ariston (2023b). Product Environnemental Profil Condensing boiler Alteas One+ Net 24 (reference: 3301771) providing heating and domestic hot water production for individual dwelling Product Environmental Profile Condensing boiler Alteas One+ Net 24 providing heating and domestic hot water production for individual dwelling. [online] PEP Ecopassport . Available at: https://register.pep-ecopassport…
	2	CHAPPÉE (2021). PRODUCT ENVIRONMENTAL PROFILE Individual mixed wall-mounted gas condensing boiler CHAPPÉE -ACCEA. [online] PEP Ecopassport . Available at: https://register.pep-ecopassport.org/pep/consult/mbesqrsCBZbWbKJq6-kJ3itAcihcBIz5ewJYeRLslxE/mbesqrsCBZbWbKJq6-kJ3lQmBuGvAHsLUfQU9idjOpk [Accessed 21 Nov. 2025].
	3	DE DIETRICH (2022). Profile Environmental Product Individual mixed wall-mounted gas condensing boiler De Dietrich -MCR-S Product category. [online] PEP Ecopassport . Available at: https://register.pep-ecopassport.org/pep/consult/mbesqrsCBZbWbKJq6-kJ3nkNQD2_9ngUG3PvD_fTDo0/mbesqrsCBZbWbKJq6-kJ3lQmBuGvAHsLUfQU9idjOpk [Accessed 21 Nov. 2025].
	4	DE DIETRICH (2024a). Product Environmental Profile Individual mixed wall-mounted gas condensing boiler MPX2 MI (BE). [online] PEP Ecopassport . Available at: https://register.pep-ecopassport.org/pep/consult/mbesqrsCBZbWbKJq6-kJ3q3X42iEI6SliyWemszXi-w/mbesqrsCBZbWbKJq6-kJ3lQmBuGvAHsLUfQU9idjOpk [Accessed 21 Nov. 2025].
	5	DE DIETRICH (2024). Product Environmental Profile Individual wall-mounted gas condensing boiler MPX2 System (BE). [online] PEP Ecopassport . Available at: https://register.pep-ecopassport.org/pep/consult/mbesqrsCBZbWbKJq6-kJ3s_L7H5OKzL59JFGWdv3vKA/mbesqrsCBZbWbKJq6-kJ3lQmBuGvAHsLUfQU9idjOpk [Accessed 21 Nov. 2025].
	6	DE DIETRICH (2024b). Product Environmental Profile Individual mixed wall-mounted gas condensing boiler MPX2 MI (FR). [online] PEP Ecopassport . Available at: https://register.pep-ecopassport.org/pep/consult/mbesqrsCBZbWbKJq6-kJ3jn6YPq_kisD1I5F4GBrtPc/mbesqrsCBZbWbKJq6-kJ3lQmBuGvAHsLUfQU9idjOpk [Accessed 21 Nov. 2025].
	7	DE DIETRICH (2024c). Product Environmental Profile Individual wall-mounted gas condensing boiler MPX2 System (FR). [online] PEP Ecopassport . Available at: https://register.pep-ecopassport.org/pep/consult/mbesqrsCBZbWbKJq6-kJ3t4g5BQ8UvPAgrb5fPO3HiY/mbesqrsCBZbWbKJq6-kJ3lQmBuGvAHsLUfQU9idjOpk [Accessed 21 Nov. 2025].
	8	Remeha (2022a). Individual mixed wall-mounted gas condensing boiler. [online] PEP Ecopassport . Available at: https://register.pep-ecopassport.org/pep/consult/mbesqrsCBZbWbKJq6-kJ3sz7NNuRGsz4S82-oS4b-qk/mbesqrsCBZbWbKJq6-kJ3lQmBuGvAHsLUfQU9idjOpk [Accessed 21 Nov. 2025].
	9	Remeha (2022b). Individual mixed wall-mounted gas condensing boiler. [online] PEP Ecopassport . Available at: https://register.pep-ecopassport.org/pep/consult/mbesqrsCBZbWbKJq6-kJ3qEggBO-ggMD4V8EvQV_Qa4/mbesqrsCBZbWbKJq6-kJ3lQmBuGvAHsLUfQU9idjOpk [Accessed 21 Nov. 2025].
	10	Remeha (2023c). TZERRA Ace-Matic (NL). [online] PEP Ecopassport . Available at: https://register.pep-ecopassport.org/pep/consult/mbesqrsCBZbWbKJq6-kJ3ga3uP9l2qX600a1EdHA5lk/mbesqrsCBZbWbKJq6-kJ3lQmBuGvAHsLUfQU9idjOpk [Accessed 21 Nov. 2025].
	11	Remeha (2023b). TZERRA Ace-Matic (DE). [online] PEP Ecopassport . Available at: https://register.pep-ecopassport.org/pep/consult/mbesqrsCBZbWbKJq6-kJ3oh8iypliQ-la-PlA7-wssA/mbesqrsCBZbWbKJq6-kJ3lQmBuGvAHsLUfQU9idjOpk [Accessed 21 Nov. 2025].
	12	Remeha (2023a). TZERRA Ace-Matic (BE). [online] PEP Ecopassport . Available at: https://register.pep-ecopassport.org/pep/consult/mbesqrsCBZbWbKJq6-kJ3hhLjOiRUbbZI5uFSkl_ZLA/mbesqrsCBZbWbKJq6-kJ3lQmBuGvAHsLUfQU9idjOpk [Accessed 21 Nov. 2025].
	13	Remeha (2023d). TZERRA Ace-Matic - System (BE). [online] PEP Ecopassport . Available at: https://register.pep-ecopassport.org/pep/consult/mbesqrsCBZbWbKJq6-kJ3jzxY5oZVLMxRGW9z59ayj4/mbesqrsCBZbWbKJq6-kJ3lQmBuGvAHsLUfQU9idjOpk [Accessed 21 Nov. 2025].
	14	Remeha (2023e). TZERRA Ace-Matic - System (DE). [online] PEP Ecopassport . Available at: https://register.pep-ecopassport.org/pep/consult/mbesqrsCBZbWbKJq6-kJ3hY37ePQV_gys6mgYiTr6KQ/mbesqrsCBZbWbKJq6-kJ3lQmBuGvAHsLUfQU9idjOpk [Accessed 21 Nov. 2025].
	15	ATLANTIC (2023). Naia 3 micro. [online] PEP Ecopassport . Available at: https://register.pep-ecopassport.org/pep/consult/mbesqrsCBZbWbKJq6-kJ3skltvttM_S-IyYvneBJRvs/mbesqrsCBZbWbKJq6-kJ3nXTEwaL2H-VUQApFU2-Q6g [Accessed 21 Nov. 2025].
	16	SAUNIER DUVAL (2024c). Saunier Duval - ThemaFast Condens 31. [online] PEP Ecopassport . Available at: https://register.pep-ecopassport.org/pep/consult/mbesqrsCBZbWbKJq6-kJ3swSDDZ9z5LAZcEj-TPxALg/mbesqrsCBZbWbKJq6-kJ3nXTEwaL2H-VUQApFU2-Q6g [Accessed 21 Nov. 2025].
	17	VALLANT (2024b). ecoTEC plus VUW 25/32CS/1-5. [online] PEP Ecopassport . Available at: https://register.pep-ecopassport.org/pep/consult/mbesqrsCBZbWbKJq6-kJ3hAU8wYNHfDnAC9XUwDEHj4/mbesqrsCBZbWbKJq6-kJ3nXTEwaL2H-VUQApFU2-Q6g [Accessed 21 Nov. 2025].
	18	VALLANT (2024a). ecoTEC plus système VU 25 CS/1-5. [online] PEP Ecopassport . Available at: https://register.pep-ecopassport.org/pep/consult/mbesqrsCBZbWbKJq6-kJ3ia4U-yrZ28gR6DaJWCfVHs/mbesqrsCBZbWbKJq6-kJ3nXTEwaL2H-VUQApFU2-Q6g [Accessed 21 Nov. 2025].
	19	UNICLIMA (2022). PROFIL ENVIRONNEMENTAL PRODUIT (DECLARATION COLLECTIVE). [online] PEP Ecopassport . Available at: https://register.pep-ecopassport.org/pep/consult/mbesqrsCBZbWbKJq6-kJ3r1JiUGxVuh09vaoy_icrAo/mbesqrsCBZbWbKJq6-kJ3nXTEwaL2H-VUQApFU2-Q6g [Accessed 21 Nov. 2025].
	20	HM HEIZKÖRPER GMBH HEATING TECHNOLOGY (2024a). Gamme de radiateur eau chaude CLASSIC . [online] PEP Ecopassport . Available at: https://register.pep-ecopassport.org/pep/consult/mbesqrsCBZbWbKJq6-kJ3rTFCS84Y6UIgOkgedY_cvE/mbesqrsCBZbWbKJq6-kJ3nXTEwaL2H-VUQApFU2-Q6g [Accessed 21 Nov. 2025].
	21	HM HEIZKÖRPER GMBH HEATING TECHNOLOGY (2024b). Gamme de radiateur eau chaude GALANT. [online] PEP Ecopassport . Available at: https://register.pep-ecopassport.org/pep/consult/mbesqrsCBZbWbKJq6-kJ3hkSwftek-KJewQR5l0JDRw/mbesqrsCBZbWbKJq6-kJ3nXTEwaL2H-VUQApFU2-Q6g [Accessed 21 Nov. 2025].
	22	HM HEIZKÖRPER GMBH HEATING TECHNOLOGY (2024c). Gamme de radiateur eau chaude THEMA. [online] PEP Ecopassport . Available at: https://register.pep-ecopassport.org/pep/consult/mbesqrsCBZbWbKJq6-kJ3utfjMeNNLtYx-c1cFyuxk0/mbesqrsCBZbWbKJq6-kJ3nXTEwaL2H-VUQApFU2-Q6g [Accessed 21 Nov. 2025].
	23	PURMO GROUP (2022). PRODUCT ENVIRONMENTAL PROFILE THERMOPANEL V4. [online] PEP Ecopassport . Available at: https://register.pep-ecopassport.org/pep/consult/mbesqrsCBZbWbKJq6-kJ3nrlzNy1xwpUtaPJX-VyAtk/mbesqrsCBZbWbKJq6-kJ3lQmBuGvAHsLUfQU9idjOpk [Accessed 21 Nov. 2025].
	24	ZHENDER GROUP FRANCE (2024). PROFIL ENVIRONMENTAL PRODUIT Détenteur de la déclaration Méthodologie. [online] PEP Ecopassport . Available at: https://register.pep-ecopassport.org/pep/consult/mbesqrsCBZbWbKJq6-kJ3tYTp5GU5RQKX4eLF05kfZY/mbesqrsCBZbWbKJq6-kJ3nXTEwaL2H-VUQApFU2-Q6g [Accessed 21 Nov. 2025].
	25	NEOMITIS (2020a). PROFIL ENVIRONNEMENTAL PRODUIT Myneo Fluid . [online] PEP Ecopassport . Available at: https://register.pep-ecopassport.org/pep/consult [Accessed 13 Dec. 2024].
	26	NEOMITIS (2020b). PROFIL ENVIRONNEMENTAL PRODUIT Optalys & Aloe Digital. [online] PEP Ecopassport . Available at: https://register.pep-ecopassport.org/pep/consult [Accessed 13 Dec. 2024].
	27	NEOMITIS (2022). NEOMITIS - EFLUID - Radiateur connecté - EZRFLD1001. [online] PEP Ecopassport . Available at: https://register.pep-ecopassport.org/pep/consult/mbesqrsCBZbWbKJq6-kJ3p3n5O3XXvisfVdJf_dye3s/mbesqrsCBZbWbKJq6-kJ3nXTEwaL2H-VUQApFU2-Q6g [Accessed 21 Nov. 2025].
	28	NEOMITIS (2024). NEOMITIS - VELKIS - Radiateur - RFLB100VE1. [online] PEP Ecopassport . Available at: https://register.pep-ecopassport.org/pep/consult/mbesqrsCBZbWbKJq6-kJ3uyDx9ErYGX7i8s8coyDd3Y/mbesqrsCBZbWbKJq6-kJ3nXTEwaL2H-VUQApFU2-Q6g [Accessed 21 Nov. 2025].
	29	THERMANCE (2024). THERMANCE - TEKO - Radiateur - RAD30163 (1000W). [online] PEP Ecopassport . Available at: https://register.pep-ecopassport.org/pep/consult/mbesqrsCBZbWbKJq6-kJ3nypQqhaDWeiPIb2cF73cNc/mbesqrsCBZbWbKJq6-kJ3nXTEwaL2H-VUQApFU2-Q6g [Accessed 21 Nov. 2025].
	30	ATLANTIC (2021b). NARIA NKF15. [online] PEP Ecopassport , Available at: https://register.pep-ecopassport.org/pep/consult/mbesqrsCBZbWbKJq6-kJ3lr1HkqpmoRHJcg6gHcnym0/mbesqrsCBZbWbKJq6-kJ3nXTEwaL2H-VUQApFU2-Q6g [Accessed 21 Nov. 2025].
	31	THERMOR (2021). FSC2 (LISBONNE 2). Sociographe, [online] N° Hors-série(1). Available at: https://register.pep-ecopassport.org/pep/consult/mbesqrsCBZbWbKJq6-kJ3gzdKblOmY9UqarF3ZlAMgE/mbesqrsCBZbWbKJq6-kJ3nXTEwaL2H-VUQApFU2-Q6g [Accessed 21 Nov. 2025].
	32	ATLANTIC (2021a). AGILIA PI. [online] PEP Ecopassport , Available at: https://register.pep-ecopassport.org/pep/consult/mbesqrsCBZbWbKJq6-kJ3gs-T7QtVUaJLOHmaJTInLs/mbesqrsCBZbWbKJq6-kJ3nXTEwaL2H-VUQApFU2-Q6g [Accessed 21 Nov. 2025].
	33	THERMOR (2022b). INGENIO V. [online] PEP Ecopassport . Available at: https://register.pep-ecopassport.org/pep/consult/mbesqrsCBZbWbKJq6-kJ3jOef9sIg1B3A64zo18Q67s/mbesqrsCBZbWbKJq6-kJ3nXTEwaL2H-VUQApFU2-Q6g [Accessed 24 Nov. 2025].
	34	THERMOR (2022a). INGENIO H. [online] PEP Ecopassport . Available at: https://register.pep-ecopassport.org/pep/consult/mbesqrsCBZbWbKJq6-kJ3sa180xdCJdTewpp5HJVKeY/mbesqrsCBZbWbKJq6-kJ3nXTEwaL2H-VUQApFU2-Q6g [Accessed 24 Nov. 2025].
	35	INTUIS (2020). Etic Compact Horizontal. PEP Ecopassport .
	36	INTUIS (2021b). RCD-3EO / RCDM-3EO / Noveo 4 Horizontal. [online] PEP Ecopassport . Available at: https://register.pep-ecopassport.org/pep/consult/mbesqrsCBZbWbKJq6-kJ3kvssglpTgAWzgnf-vcPMvM/mbesqrsCBZbWbKJq6-kJ3nXTEwaL2H-VUQApFU2-Q6g [Accessed 24 Nov. 2025].
	37	INTUIS (2021l). RCD-3EO / RCDM-3EO / Noveo 4 Vertical. [online] PEP Ecopassport . Available at: https://register.pep-ecopassport.org/pep/consult/mbesqrsCBZbWbKJq6-kJ3oTxbPEsMUJtX1ygpV8jUY8/mbesqrsCBZbWbKJq6-kJ3nXTEwaL2H-VUQApFU2-Q6g [Accessed 24 Nov. 2025].
	38	INTUIS (2021m). Sensual Horizontal. [online] PEP Ecopassport . Available at: https://register.pep-ecopassport.org/pep/consult/mbesqrsCBZbWbKJq6-kJ3md22y3oeHT9x_tjNU7Me8M/mbesqrsCBZbWbKJq6-kJ3nXTEwaL2H-VUQApFU2-Q6g [Accessed 24 Nov. 2025].
	39	INTUIS (2021n). Sensual Vertical. [online] PEP Ecopassport . Available at: https://register.pep-ecopassport.org/pep/consult/mbesqrsCBZbWbKJq6-kJ3tm-D5jC2xpH4vDYHBZEmjc/mbesqrsCBZbWbKJq6-kJ3nXTEwaL2H-VUQApFU2-Q6g [Accessed 24 Nov. 2025].
	40	INTUIS (2021k). Etic Slim. [online] PEP Ecopassport . Available at: https://register.pep-ecopassport.org/pep/consult/mbesqrsCBZbWbKJq6-kJ3mIPkk6jiHWyubgHsGqLOvY/mbesqrsCBZbWbKJq6-kJ3nXTEwaL2H-VUQApFU2-Q6g [Accessed 24 Nov. 2025].
	41	INTUIS (2021j). Etic compact vertical. [online] PEP Ecopassport . Available at: https://register.pep-ecopassport.org/pep/consult/mbesqrsCBZbWbKJq6-kJ3gw1rsDcwXlXdMz_p7MwZxU/mbesqrsCBZbWbKJq6-kJ3nXTEwaL2H-VUQApFU2-Q6g [Accessed 24 Nov. 2025].
	42	INTUIS (2021i). Calidoo Horizontal. [online] PEP Ecopassport . Available at: https://register.pep-ecopassport.org/pep/consult/mbesqrsCBZbWbKJq6-kJ3u7pVlfbpN4JZztnTeYRfR4/mbesqrsCBZbWbKJq6-kJ3nXTEwaL2H-VUQApFU2-Q6g [Accessed 24 Nov. 2025].
	43	INTUIS (2021a). Calidoo Bas. [online] PEP Ecopassport . Available at: https://register.pep-ecopassport.org/pep/consult/mbesqrsCBZbWbKJq6-kJ3m9JCbQHfD3axQdJlQy4-MA/mbesqrsCBZbWbKJq6-kJ3nXTEwaL2H-VUQApFU2-Q6g [Accessed 24 Nov. 2025].
	44	INTUIS (2022c). Calidoo Vertical. [online] PEP Ecopassport . Available at: https://register.pep-ecopassport.org/pep/consult/mbesqrsCBZbWbKJq6-kJ3jF1C3g-l3aLR79wfTFyTUo/mbesqrsCBZbWbKJq6-kJ3nXTEwaL2H-VUQApFU2-Q6g [Accessed 24 Nov. 2025].
	45	INTUIS (2021d). Axoo Horizontal. [online] PEP Ecopassport . Available at: https://register.pep-ecopassport.org/pep/consult/mbesqrsCBZbWbKJq6-kJ3ieNypAW6HZPj3wWTRvJV30/mbesqrsCBZbWbKJq6-kJ3nXTEwaL2H-VUQApFU2-Q6g [Accessed 24 Nov. 2025].
	46	INTUIS (2021c). Axoo Bas. [online] PEP Ecopassport . Available at: https://register.pep-ecopassport.org/pep/consult/mbesqrsCBZbWbKJq6-kJ3pTMjM21UsCTO_Q5w3etzc8/mbesqrsCBZbWbKJq6-kJ3nXTEwaL2H-VUQApFU2-Q6g [Accessed 24 Nov. 2025].
	47	INTUIS (2021e). Axoo Vertical. [online] PEP Ecopassport . Available at: https://register.pep-ecopassport.org/pep/consult/mbesqrsCBZbWbKJq6-kJ3otlTLkY8CFr8rs3dhfgDAw/mbesqrsCBZbWbKJq6-kJ3nXTEwaL2H-VUQApFU2-Q6g [Accessed 24 Nov. 2025].
	48	INTUIS (2021g). Beladoo Horizontal. [online] PEP Ecopassport . Available at: https://register.pep-ecopassport.org/pep/consult/mbesqrsCBZbWbKJq6-kJ3uGzvrcKK9SczKfdCB24Xrs/mbesqrsCBZbWbKJq6-kJ3nXTEwaL2H-VUQApFU2-Q6g [Accessed 24 Nov. 2025].
	49	INTUIS (2021f). Beladoo Bas. [online] PEP Ecopassport . Available at: https://register.pep-ecopassport.org/pep/consult/mbesqrsCBZbWbKJq6-kJ3lILBeqkkGDQTKBwcywglPo/mbesqrsCBZbWbKJq6-kJ3nXTEwaL2H-VUQApFU2-Q6g [Accessed 24 Nov. 2025].
	50	INTUIS (2022b). Beladoo Vertical. [online] PEP Ecopassport . Available at: https://register.pep-ecopassport.org/pep/consult/mbesqrsCBZbWbKJq6-kJ3oWJHHOWApMFLpHnl_72H08/mbesqrsCBZbWbKJq6-kJ3nXTEwaL2H-VUQApFU2-Q6g [Accessed 24 Nov. 2025].
	51	INTUIS (2021h). Beladoo Plinthes. [online] PEP Ecopassport . Available at: https://register.pep-ecopassport.org/pep/consult/mbesqrsCBZbWbKJq6-kJ3r327DYGxXHF88DMPt85uNg/mbesqrsCBZbWbKJq6-kJ3nXTEwaL2H-VUQApFU2-Q6g [Accessed 24 Nov. 2025].
	52	INTUIS (2022f). R21 D. [online] PEP Ecopassport . Available at: https://register.pep-ecopassport.org/pep/consult/mbesqrsCBZbWbKJq6-kJ3qLcE8emh6-kEkI4XAJux20/mbesqrsCBZbWbKJq6-kJ3nXTEwaL2H-VUQApFU2-Q6g [Accessed 24 Nov. 2025].
	53	INTUIS (2022a). Axino / Radiadlo. [online] PEP Ecopassport . Available at: https://register.pep-ecopassport.org/pep/consult/mbesqrsCBZbWbKJq6-kJ3lnGzVgRSk2Bs_-fCv2-Q6Q/mbesqrsCBZbWbKJq6-kJ3nXTEwaL2H-VUQApFU2-Q6g [Accessed 24 Nov. 2025].
	54	INTUIS (2022g). RFD-3EO. [online] PEP Ecopassport . Available at: https://register.pep-ecopassport.org/pep/consult/mbesqrsCBZbWbKJq6-kJ3r6hyzHI2w8mI-oEtIGBlqo/mbesqrsCBZbWbKJq6-kJ3nXTEwaL2H-VUQApFU2-Q6g [Accessed 24 Nov. 2025].
	55	INTUIS (2022d). Chamane. [online] PEP Ecopassport . Available at: https://register.pep-ecopassport.org/pep/consult/mbesqrsCBZbWbKJq6-kJ3qCWRs469Q8yrqPn3-7rF-g/mbesqrsCBZbWbKJq6-kJ3nXTEwaL2H-VUQApFU2-Q6g [Accessed 24 Nov. 2025].
	56	INTUIS (2022e). Oslo 2 / RAD NEO. [online] PEP Ecopassport . Available at: https://register.pep-ecopassport.org/pep/consult/mbesqrsCBZbWbKJq6-kJ3q093F1TDh0lfyA_ALl4i3A/mbesqrsCBZbWbKJq6-kJ3nXTEwaL2H-VUQApFU2-Q6g [Accessed 24 Nov. 2025].
	57	ACOVA (2022). RADIATEUR COLGA PLUS TAMH-100-063/CF - 1000W. [online] PEP Ecopassport . Available at: https://register.pep-ecopassport.org/pep/consult/mbesqrsCBZbWbKJq6-kJ3vRC6UnoEIK2CM1IINEkPZU/mbesqrsCBZbWbKJq6-kJ3nXTEwaL2H-VUQApFU2-Q6g [Accessed 24 Nov. 2025].
	58	ATLANTIC (2024). Atlantic Mileo + 300. [online] PEP Ecopassport . Available at: https://register.pep-ecopassport.org/pep/consult/mbesqrsCBZbWbKJq6-kJ3veteI57K2eGuHyWKUR6_Uo/mbesqrsCBZbWbKJq6-kJ3nXTEwaL2H-VUQApFU2-Q6g [Accessed 24 Nov. 2025].
	59	ACV (2024b). Smart E 300. [online] PEP Ecopassport . Available at: https://register.pep-ecopassport.org/pep/consult/mbesqrsCBZbWbKJq6-kJ3gGZuzMRsCEuySJct7AyWM4/mbesqrsCBZbWbKJq6-kJ3nXTEwaL2H-VUQApFU2-Q6g [Accessed 24 Nov. 2025].
	60	ACV (2024a). HRI 600. [online] PEP Ecopassport . Available at: https://register.pep-ecopassport.org/pep/consult/mbesqrsCBZbWbKJq6-kJ3uNcq1c351NI4MyafLVhJpQ/mbesqrsCBZbWbKJq6-kJ3nXTEwaL2H-VUQApFU2-Q6g [Accessed 1 Oct. 2024].
	61	ALDES (2021). T.One® AquaAIR R410A (obsolète). [online] PEP Ecopassport . Available at: https://register.pep-ecopassport.org/pep/consult/mbesqrsCBZbWbKJq6-kJ3hRgk9wD858lqfaABu7CNkM/mbesqrsCBZbWbKJq6-kJ3nXTEwaL2H-VUQApFU2-Q6g [Accessed 25 Nov. 2025].
	62	ALDES (2022). T.One® AquaAIR R32 + accessoires (obsolète). [online] PEP Ecopassport . Available at: https://register.pep-ecopassport.org/pep/consult/mbesqrsCBZbWbKJq6-kJ3un3ExtqTU0kjtxhFqj1-kk/mbesqrsCBZbWbKJq6-kJ3nXTEwaL2H-VUQApFU2-Q6g [Accessed 25 Nov. 2025].
	63	Ariston (2023a). Air/Water heat pump Nimbus Pocket/Arianext Lite R32 50 . [online] PEP Ecopassport . Available at: https://register.pep-ecopassport.org/pep/consult/mbesqrsCBZbWbKJq6-kJ3oRm2rX8sMf1hH6w7uDMntk/mbesqrsCBZbWbKJq6-kJ3lQmBuGvAHsLUfQU9idjOpk [Accessed 25 Nov. 2025].
	64	ARISTON (2020). Arianext Compact 50S . PEP Ecopassport .
	65	ARKTEOS (2025b). BAGUIO 4 ECS - R32. [online] PEP Ecopassport . Available at: https://register.pep-ecopassport.org/pep/consult/mbesqrsCBZbWbKJq6-kJ3mR4qL5OHcWbt5gwBP8ah4I/mbesqrsCBZbWbKJq6-kJ3nXTEwaL2H-VUQApFU2-Q6g [Accessed 25 Nov. 2025].
	66	ARKTEOS (2025a). BAGUIO 4 - R32. [online] PEP Ecopassport . Available at: https://register.pep-ecopassport.org/pep/consult/mbesqrsCBZbWbKJq6-kJ3tDjUimzvSVZuanupntN3ls/mbesqrsCBZbWbKJq6-kJ3nXTEwaL2H-VUQApFU2-Q6g [Accessed 25 Nov. 2025].
	67	AUER (2022b). HTi70 Double Service Pour Application Moyenne Température. [online] PEP Ecopassport . Available at: https://register.pep-ecopassport.org/pep/consult/mbesqrsCBZbWbKJq6-kJ3oNEyzPzx8BokUpQ8PSGwCM/mbesqrsCBZbWbKJq6-kJ3nXTEwaL2H-VUQApFU2-Q6g [Accessed 25 Nov. 2025].
	68	AUER (2022a). HTi70 Double Service Pour Application Basse Température. [online] PEP Ecopassport . Available at: https://register.pep-ecopassport.org/pep/consult/mbesqrsCBZbWbKJq6-kJ3kENkO520eWRe83F-ea3tdc/mbesqrsCBZbWbKJq6-kJ3nXTEwaL2H-VUQApFU2-Q6g [Accessed 25 Nov. 2025].
	69	BAXI (2023b). BAXI - ALYA WH - Platinum BC Mural iR32. [online] PEP Ecopassport . Available at: https://register.pep-ecopassport.org/pep/consult/mbesqrsCBZbWbKJq6-kJ3s9DI7EkulJ_9qhwv1QEvME/mbesqrsCBZbWbKJq6-kJ3lQmBuGvAHsLUfQU9idjOpk [Accessed 25 Nov. 2025].
	70	BAXI (2023a). BAXI - HP40/HP50 Monobloc ASHP. [online] PEP Ecopassport . Available at: https://register.pep-ecopassport.org/pep/consult/mbesqrsCBZbWbKJq6-kJ3oDktmVjJCdEJDAJumKFc6g/mbesqrsCBZbWbKJq6-kJ3lQmBuGvAHsLUfQU9idjOpk [Accessed 25 Nov. 2025].
	71	BROTJE (2024). BLW Eco-W MH/OH. [online] PEP Ecopassport . Available at: https://register.pep-ecopassport.org/pep/consult/mbesqrsCBZbWbKJq6-kJ3vDK2yG2JellJdKIsxEL6HY/mbesqrsCBZbWbKJq6-kJ3lQmBuGvAHsLUfQU9idjOpk.
	72	REMEHA (2023). ELGA ACE. [online] PEP Ecopassport . Available at: https://register.pep-ecopassport.org/pep/consult/mbesqrsCBZbWbKJq6-kJ3nLGky1AqsX9EUG-pzlmRPk/mbesqrsCBZbWbKJq6-kJ3lQmBuGvAHsLUfQU9idjOpk [Accessed 25 Nov. 2025].
	73	DAIKIN (2022a). Daikin Altherma 3 R 180L, refrigerant R-32. PEP Ecopassport .
	74	DAIKIN (2022b). Daikin Altherma 3 R 230L, refrigerant R-32. PEP Ecopassport .
	75	ATLANTIC (2022a). ALFEA EXTENSA DUO A.I. 5 R32. [online] PEP Ecopassport , Available at: https://register.pep-ecopassport.org/pep/consult/mbesqrsCBZbWbKJq6-kJ3rTi5oh2dT-u7dvOnB702do/mbesqrsCBZbWbKJq6-kJ3nXTEwaL2H-VUQApFU2-Q6g [Accessed 25 Nov. 2025].
	76	ATLANTIC (2022b). ALFEA EXTENSA A.I.5 R32. [online] PEP Ecopassport . Available at: https://register.pep-ecopassport.org/pep/consult/mbesqrsCBZbWbKJq6-kJ3mrrPLqWjGkr9ubE6diP0Tc/mbesqrsCBZbWbKJq6-kJ3nXTEwaL2H-VUQApFU2-Q6g [Accessed 25 Nov. 2025].
	77	HITACHI (2023). Hitachi Yutaki S Combi 2.0. [online] PEP Ecopassport . Available at: https://register.pep-ecopassport.org/pep/consult/mbesqrsCBZbWbKJq6-kJ3itW8a9dU7WL9S-IuFNQM9U/mbesqrsCBZbWbKJq6-kJ3nXTEwaL2H-VUQApFU2-Q6g [Accessed 25 Nov. 2025].
	78	LG ELECTRONICS INC (2022b). THERMA V: HM163M U33. [online] PEP Ecopassport . Available at: https://register.pep-ecopassport.org/pep/consult/mbesqrsCBZbWbKJq6-kJ3vHn1MTDKeC7khBB9k3SSRA/mbesqrsCBZbWbKJq6-kJ3nXTEwaL2H-VUQApFU2-Q6g [Accessed 25 Nov. 2025].
	79	LG ELECTRONICS INC (2022a). Therma V IWT : HU091MR U44 & HN0913T NK0. [online] PEP Ecopassport . Available at: https://register.pep-ecopassport.org/pep/consult/mbesqrsCBZbWbKJq6-kJ3rZju21cmTSviXJ-92ZrDmI/mbesqrsCBZbWbKJq6-kJ3nXTEwaL2H-VUQApFU2-Q6g [Accessed 25 Nov. 2025].
	80	MITSUBISHI ELECTRIC (2021). PAC AIR/EAU : ECODAN SPLIT ECOINVERTER R32 | DUO | RESIDENTIEL INDIVIDUEL. [online] PEP Ecopassport . Available at: https://register.pep-ecopassport.org/pep/consult/mbesqrsCBZbWbKJq6-kJ3t4YqZYoIIwResJZEpiVLRs/mbesqrsCBZbWbKJq6-kJ3nXTEwaL2H-VUQApFU2-Q6g [Accessed 25 Nov. 2025].
	81	MITSUBISHI ELECTRIC (2024). PAC AIR/EAU : ECODAN SPLIT POWERINVERTER R32 | REVERSIBLE | RESIDENTIEL INDIVIDUEL . [online] PEP Ecopassport . Available at: https://register.pep-ecopassport.org/pep/consult/mbesqrsCBZbWbKJq6-kJ3uiqo8ffudJolAXpu8QrwPE/mbesqrsCBZbWbKJq6-kJ3nXTEwaL2H-VUQApFU2-Q6g [Accessed 25 Nov. 2025].
	82	NIBE (2020). Pompe à chaleur monobloc air extrait/eau non réversible de production de chaud et d’eau chaude sanitaire. PEP Ecopassport .
	83	NIBE (2024). Gamme NIBE S735 Pompe à chaleur monobloc intérieure air extrait/eau. [online] PEP Ecopassport . Available at: https://register.pep-ecopassport.org/pep/consult/mbesqrsCBZbWbKJq6-kJ3p0pMdoDckIPGHN-WHG_NJw/mbesqrsCBZbWbKJq6-kJ3nXTEwaL2H-VUQApFU2-Q6g [Accessed 25 Nov. 2025].
	84	PANASONIC (2020). AQUAREA Génération H. PEP Ecopassport .
	85	PANASONIC (2024). Aquarea Haute Performance All in One avec ECS intégrée Série K. [online] PEP Ecopassport . Available at: https://register.pep-ecopassport.org/pep/consult/mbesqrsCBZbWbKJq6-kJ3oEKKWsBCMD2pPTIYzk0OKc/mbesqrsCBZbWbKJq6-kJ3nXTEwaL2H-VUQApFU2-Q6g [Accessed 25 Nov. 2025].
	86	SAUNIER DUVAL (2024b). Pompe à chaleur air/eau Saunier Duval GeniaSet Max assurant le chauffage et l’eau chaude sanitaire accumulée. [online] PEP Ecopassport . Available at: https://register.pep-ecopassport.org/pep/consult/mbesqrsCBZbWbKJq6-kJ3twS0pXA3GKSjCuCPNNcQZY/mbesqrsCBZbWbKJq6-kJ3nXTEwaL2H-VUQApFU2-Q6g [Accessed 25 Nov. 2025].
	87	SAUNIER DUVAL (2024a). GeniaAir Split - Pompe à chaleur Saunier Duval air/eau assurant le chauffage en logement individuel. [online] PEP Ecopassport . Available at: https://register.pep-ecopassport.org/pep/consult/mbesqrsCBZbWbKJq6-kJ3tGAOnmXN4wxbah5Ut-2YRM/mbesqrsCBZbWbKJq6-kJ3nXTEwaL2H-VUQApFU2-Q6g [Accessed 25 Nov. 2025].
	88	UNICLIMA (2020). Pompe à chaleur double service résidentielle air/eau . PEP Ecopassport .
	89	UNICLIMA (2023). Pompes à chaleur air/eau en double service au fluide R32 pour logement individuel. [online] PEP Ecopassport . Available at: https://register.pep-ecopassport.org/pep/consult/mbesqrsCBZbWbKJq6-kJ3iMmgLjTQCCK1N_o4LvcZYk/mbesqrsCBZbWbKJq6-kJ3nXTEwaL2H-VUQApFU2-Q6g [Accessed 25 Nov. 2025].
	90	VIESSMANN FRANCE (2023a). Vitocal 100-S. [online] PEP Ecopassport . Available at: https://register.pep-ecopassport.org/pep/consult/mbesqrsCBZbWbKJq6-kJ3tEVaKlwMLGbmqXio0TVwS4/mbesqrsCBZbWbKJq6-kJ3lQmBuGvAHsLUfQU9idjOpk [Accessed 25 Nov. 2025].
	91	VIESSMANN FRANCE (2023b). Vitocal 111-S. [online] PEP Ecopassport . Available at: https://register.pep-ecopassport.org/pep/consult/mbesqrsCBZbWbKJq6-kJ3qLRyWpc7c8x8kJI7BMPX_s/mbesqrsCBZbWbKJq6-kJ3lQmBuGvAHsLUfQU9idjOpk [Accessed 25 Nov. 2025].
	92	SGDS GRUPPEN (2024). Altech Copper Pipes (unannealed). [online] International EPD System. Available at: https://www.environdec.com/library [Accessed 11 Aug. 2025].
	93	VINIDEX (2022). PVC Non-Pressure Pipes and Conduits. [online] International EPD System. Available at: https://www.environdec.com/library [Accessed 11 Aug. 2025].
	94	ABN Pipe Systems (2019). INSTAL CT FASER RD and EVAC ENERGY PLUS. [online] International EPD System. Available at: https://www.environdec.com/library [Accessed 11 Aug. 2025].
	95	TT KABELI D.O.O (2025). N2XH Cca and B2ca, YMz1K, FR-N1X1G-U, FR-N1X1G-R, XGB, FXQ . [online] International EPD System. Available at: https://www.environdec.com/library [Accessed 11 Aug. 2025].
	96	BRASS & FITTINGS, S.L. (2021). Underfloor heating system. [online] International EPD System. Available at: https://www.environdec.com/library [Accessed 19 May 2025].

## Sheet: MI-Doors&Windows
Title: Hierarchical material intensities for doors and windows
Building levels					Material	MI	MI Unit	Age cohorts		Ref
Layer	Function	Sub-Function	Technology	Specification				<1920	2010-present
Skin	Opening	Door	Wooden door	OPUS Wooden Front Doors with glass	timber	63	kg/unit	YES	YES	1
Skin	Opening	Door	Wooden door	OPUS Wooden Front Doors with glass	glass	10.5	kg/unit	YES	YES	1
Skin	Opening	Door	Wooden door	OPUS Wooden Front Doors with glass	plastic	6.3	kg/unit		YES	1
Skin	Opening	Door	Wooden door	OPUS Wooden Front Doors with glass	metal	12.6	kg/unit		YES	1
Skin	Opening	Door	Wooden door	OPUS Wooden Front Doors	timber	77.49	kg/unit	YES	YES	2
Skin	Opening	Door	Wooden door	OPUS Wooden Front Doors	plastic	5.04	kg/unit		YES	2
Skin	Opening	Door	Wooden door	OPUS Wooden Front Doors	metal	11.13	kg/unit		YES	2
Skin	Opening	Door	Wooden door	Rationel AURA / Rationel FORMA	timber	36.716	kg/unit	YES	YES	3
Skin	Opening	Door	Wooden door	Rationel AURA / Rationel FORMA	glass	55.208	kg/unit	YES	YES	3
Skin	Opening	Door	Wooden door	Rationel AURA / Rationel FORMA	plastic	1.5812	kg/unit		YES	3
Skin	Opening	Door	Wooden door	Rationel AURA / Rationel FORMA	metal	5.1724	kg/unit		YES	3
Skin	Opening	Door	Wooden door	Rationel AURAPLUS / Rationel FORMAPLUS - glazed	timber	35.108	kg/unit	YES	YES	4
Skin	Opening	Door	Wooden door	Rationel AURAPLUS / Rationel FORMAPLUS - glazed	glass	54.94	kg/unit	YES	YES	4
Skin	Opening	Door	Wooden door	Rationel AURAPLUS / Rationel FORMAPLUS - glazed	plastic	1.34	kg/unit		YES	4
Skin	Opening	Door	Wooden door	Rationel AURAPLUS / Rationel FORMAPLUS - glazed	metal	9.38	kg/unit		YES	4
Skin	Opening	Door	Wooden door	ST10 Ei30 RW43 RC2 with glass	timber	81.207	kg/unit	YES	YES	5
Skin	Opening	Door	Wooden door	ST10 Ei30 RW43 RC2 with glass	glass	27.3	kg/unit	YES	YES	5
Skin	Opening	Door	Wooden door	ST10 Ei30 RW43 RC2 with glass	plastic	0.651	kg/unit		YES	5
Skin	Opening	Door	Wooden door	ST10 Ei30 RW43 RC2 with glass	metal	11.613	kg/unit		YES	5
Skin	Opening	Door	Steel door	Steel doors S30/Y30 - S63/Y63	timber	0.945	kg/unit	YES	YES	6
Skin	Opening	Door	Steel door	Steel doors S30/Y30 - S63/Y63	glass	0.0378	kg/unit	YES	YES	6
Skin	Opening	Door	Steel door	Steel doors S30/Y30 - S63/Y63	metal	84.483	kg/unit		YES	6
Skin	Opening	Window	Metal frame window	hinged windows, series ITESAL 45, coated	glass	22.54	kg/unit	YES	YES	7
Skin	Opening	Window	Metal frame window	hinged windows, series ITESAL 45, coated	plastic	1.012	kg/unit		YES	7
Skin	Opening	Window	Metal frame window	hinged windows, series ITESAL 45, coated	metal	25.1344	kg/unit		YES	7
Skin	Opening	Window	Metal frame window	Glass fiber fixed window OK	glass	32.214	kg/unit	YES	YES	8
Skin	Opening	Window	Metal frame window	Glass fiber fixed window OK	plastic	0.4004	kg/unit		YES	8
Skin	Opening	Window	Metal frame window	Glass fiber fixed window OK	metal	5.4418	kg/unit		YES	8
Skin	Opening	Window	Metal frame window	forster unico Windows	glass	90.2139	kg/unit	YES	YES	9
Skin	Opening	Window	Metal frame window	forster unico Windows	plastic	11.2727	kg/unit		YES	9
Skin	Opening	Window	Metal frame window	forster unico Windows	metal	80.427	kg/unit		YES	9
Skin	Opening	Window	Wooden frame window	VELFAC Classic wood–Top-guided window	timber	19.0372	kg/unit	YES	YES	10
Skin	Opening	Window	Wooden frame window	VELFAC Classic wood–Top-guided window	glass	40.1674	kg/unit	YES	YES	10
Skin	Opening	Window	Wooden frame window	VELFAC Classic wood–Top-guided window	plastic	0.455	kg/unit		YES	10
Skin	Opening	Window	Wooden frame window	VELFAC Classic wood–Top-guided window	metal	2.821	kg/unit		YES	10
Skin	Opening	Window	Wooden frame window	Side hung window 3-glass Alu - AFSC	timber	16.9806	kg/unit	YES	YES	11
Skin	Opening	Window	Wooden frame window	Side hung window 3-glass Alu - AFSC	glass	40.7498	kg/unit	YES	YES	11
Skin	Opening	Window	Wooden frame window	Side hung window 3-glass Alu - AFSC	plastic	0.3094	kg/unit		YES	11
Skin	Opening	Window	Wooden frame window	Side hung window 3-glass Alu - AFSC	metal	5.9514	kg/unit		YES	11
Skin	Opening	Window	Composite frame window	Viking SW17 Aluclad Window Viking SW17 Wooden Window	timber	15.015	kg/unit	YES	YES	12
Skin	Opening	Window	Composite frame window	Viking SW17 Aluclad Window Viking SW17 Wooden Window	glass	42.0238	kg/unit	YES	YES	12
Skin	Opening	Window	Composite frame window	Viking SW17 Aluclad Window Viking SW17 Wooden Window	metal	9.009	kg/unit		YES	12
Skin	Opening	Window	Composite frame window	SERIE STH ECO – WINDOW SYSTEM	timber	9.919	kg/unit	YES	YES	13
Skin	Opening	Window	Composite frame window	SERIE STH ECO – WINDOW SYSTEM	glass	42.2968	kg/unit	YES	YES	13
Skin	Opening	Window	Composite frame window	SERIE STH ECO – WINDOW SYSTEM	metal	12.4852	kg/unit		YES	13
Skin	Opening	Window	Composite frame window	Side-hung window 2+1 Kipp/Dreh - IKL-AL	timber	7.0434	kg/unit	YES	YES	14
Skin	Opening	Window	Composite frame window	Side-hung window 2+1 Kipp/Dreh - IKL-AL	glass	40.859	kg/unit	YES	YES	14
Skin	Opening	Window	Composite frame window	Side-hung window 2+1 Kipp/Dreh - IKL-AL	plastic	0.637	kg/unit		YES	14
Skin	Opening	Window	Composite frame window	Side-hung window 2+1 Kipp/Dreh - IKL-AL	metal	8.1536	kg/unit		YES	14
Space	Opening	Door	Wooden Door	Forza FD60 Flush Solid Core Timber Door	timber	67.6	kg/unit	YES	YES	15
References
	1	Saint-Gobain Building Distribution (SGDS) (2024). Environmental Product Declaration for OPUS Wooden Front Doors with glass. [online] The International EPD® System. Available at: https://www.environdec.com/library/epd16125.
	2	Saint-Gobain Building Distribution (SGDS) (2024). Environmental Product Declaration for OPUS Wooden Front Doors. [online] The International EPD® System. Available at: https://environdec.com/library/epd16101.
	3	Rationel (2024). Environmental Product Declaration for Rationel AURAPLUS/ FORMAPLUS - Flush Entrance Door – inward/outward opening. [online] The International EPD® System. Available at: https://rationel.co.uk/wp-content/uploads/sites/2/2024/05/2024_05_16_Rationel-AURAPLUS_FORMAPLUS-Flush-entrance-door-EPD.pdf.
	4	Rationel (2024b). Environmental Product Declaration Rationel AURAPLUS / Rationel FORMAPLUS – Glazed entrance door, inward opening. [online] The International EPD® System. Available at: https://rationel.co.uk/wp-content/uploads/sites/2/2024/05/2024_05_16_Rationel-AURAPLUS_FORMAPLUS-Flush-entrance-door-EPD.pdf.
	5	Dieden ekodoor (2024). Environmental Product Declaration for ST10 Ei30 RW43 RC2 with glass;ST10 Ei30 RW43 with glass;ST10 RW43 RC2 with glass;ST10 RW43 with glass. [online] The International EPD® System. Available at: https://https//www.environdec.com/library/epd8652.
	6	Daloc AB (2024). Environmental Product Declaration for Steel doors S30/Y30 - S63/Y63 with or without glass. [online] The International EPD® System. Available at: https://www.daloc.de/media/fkzfqxu3/epd-daloc-s30y30-to-s63y63-with-or-without-glass.pdf.
	7	ITESAL (2022). Environmental Product Declaration for window systems. [online] The International EPD® System. Available at: https://www.itesalventanas.es/documentos/paginas/100-DAP%20ITESAL%20Windows%20and%20door%20-%20English.pdf.
	8	Orama i Lysekil AB (2023). Environmental Product Declaration for Glass fiber fixed window OK. [online] The International EPD® System. Available at: https://www.environdec.com/library/epd9769.
	9	Forster (2024). Environmental Product Declaration for forster unico windows. [online] The International EPD® System. Available at: https://www.forster-profile.ch/gb-en/downloads/download-kategorie-detail/downloads-2023/product/forster-unico.html.
	10	VELFAC (2023). Environmental Product Declaration VELFAC Classic wood–Top-guided window. [online] The International EPD System. Available at: https://products-domestic.velfac.co.uk/downloads/19599/35356/#p-35551.
	11	Elitfönster AB (2024). Environmental Product Declaration for Elitfönster Original Alu 100 - Sidehung window 3-glass Alu (AFSC). [online] The International EPD® System. Available at: https://www.environdec.com/library/epd12884.
	12	Viking Window AS (2025). Environmental Product Declaration for Viking SW17 Aluclad Window, Viking SW17 Wooden Window. [online] The International EPD® System. Available at: https://www.environdec.com/library/epd17889.
	13	Novalprogetti srl (2023). Environmental Product Declaration for SERIE STH ECO – WINDOW SYSTEM. [online] The International EPD® System. Available at: https://www.noval.group/en/certification-epd/.
	14	Elitfönster AB (2023). Elitfönster Harmoni 2+1 Kipp-Dreh windows - IKI-AL kd - Window. [online] The International EPD® System. Available at: https://www.environdec.com/library/epd6947.
	15	Forza Doors Ltd. (2023). Environmental Product Declaration Forza FD60 Flush Solid Core Timber Door 2040x926x54mm . [online] The International EPD System. Available at: https://forza-doors.com/media/icelktjo/forza-fd60-flush-solid-core-timber-door-2040x926x54mm.pdf.

## Sheet: MI-Conc
Title: Hierarchical material intensities for structure, skin and space of multistorey concrete frame apartment buildings
Note: As expalined in the main paper material intensities for structures of multistorey concrete frame apartment buildings are calculated from real building data.
Building levels						Material Density (kg/m3)	MI	MI Unit	Age cohorts		Ref
Layer	Function	Sub-Function	Technology	Specification	Material				<1920	2010-present
Structure	Deep foundation	Pile cap	Reinforced concrete	Reinforced concrete pile cap	concrete	2400	31.98	kg/m2 (GFA)		YES	(From case study)
Structure	Deep foundation	Pile cap	Reinforced concrete	Reinforced concrete pile cap	reinforcement bar	7850	0.49569	kg/m2 (GFA)		YES	(From case study)
Structure	Deep foundation	Piles	Reinforced concrete	Reinforced concrete circular piles	concrete	2400	145.275	kg/m2 (GFA)		YES	(From case study)
Structure	Deep foundation	Piles	Reinforced concrete	Reinforced concrete circular piles	reinforcement bar	7850	2.25176	kg/m2 (GFA)		YES	(From case study)
Structure	Shallow foundation	Ground slab	Reinforced concrete	Reinforced concrete foundation slab	concrete	2400	93.27	kg/m2 (GFA)		YES	(From case study)
Structure	Shallow foundation	Ground slab	Reinforced concrete	Reinforced concrete foundation slab	reinforcement bar	7850	1.88872	kg/m2 (GFA)		YES	(From case study)
Structure	Shallow foundation	Footing and beam	Reinforced concrete	Reinforced concrete strip footing	concrete	2400	8.8325	kg/m2 (GFA)		YES	(From case study)
Structure	Shallow foundation	Footing and beam	Reinforced concrete	Reinforced concrete strip footing	reinforcement bar	7850	0.178858	kg/m2 (GFA)		YES	(From case study)
Structure	Shallow foundation	Footing and beam	Reinforced concrete	Reinforced concrete ground beam	concrete	2400	16.785	kg/m2 (GFA)		YES	(From case study)
Structure	Shallow foundation	Footing and beam	Reinforced concrete	Reinforced concrete ground beam	reinforcement bar	7850	0.339896	kg/m2 (GFA)		YES	(From case study)
Structure	Frame	Beam 1	Reinforced concrete	Reinforced concrete rectangular beam	concrete	2400	14.985	kg/m2 (GFA)		YES	(From case study)
Structure	Frame	Beam 1	Reinforced concrete	Reinforced concrete rectangular beam	reinforcement bar	7850	0.414585	kg/m2 (GFA)		YES	(From case study)
Structure	Frame	Beam 2	Structural steel	Steel Universal Beams (UB)	structural steel	7800	0.1825	kg/m2 (GFA)		YES	(From case study)
Structure	Frame	Column 1	Reinforced concrete	Reinforced concrete column	concrete	2400	71.25	kg/m2 (GFA)		YES	(From case study)
Structure	Frame	Column 1	Reinforced concrete	Reinforced concrete column	reinforcement bar	7850	1.97125	kg/m2 (GFA)		YES	(From case study)
Structure	Frame	Column 2	Structural steel	Steel Universal Columns (UC)	structural steel	7800	0.321	kg/m2 (GFA)		YES	(From case study)
Structure	Stair/ramp	Load bearing	Reinforced concrete	Reinforced Concrete stair	concrete	2400	0.0125	kg/m2 (GFA)		YES	(From case study)
Structure	Stair/ramp	Load bearing	Reinforced concrete	Reinforced Concrete stair	reinforcement bar	7850	0.00024375	kg/m2 (GFA)		YES	(From case study)
Structure	Floor	Load bearing slab 1	Reinforced concrete	Reinforced concrete slab	concrete	2400	553.555	kg/m2 (GFA)		YES	(From case study)
Structure	Floor	Load bearing slab 1	Reinforced concrete	Reinforced concrete slab	reinforcement bar	7850	6.5873	kg/m2 (GFA)		YES	(From case study)
Structure	Floor	Load bearing slab 2	Prestressed concrete	Post tensioned concrete slab	concrete	2400	120.65	kg/m2 (GFA)		YES	(From case study)
Structure	Floor	Load bearing slab 2	Prestressed concrete	Post tensioned concrete slab	reinforcement bar	7850	1.43573	kg/m2 (GFA)		YES	(From case study)
Structure	Roof	Load bearing	Reinforced concrete	Reinforced concrete roof slab	concrete	2400	0.26	kg/m2 (GFA)		YES	(From case study)
Structure	Roof	Load bearing	Reinforced concrete	Reinforced concrete roof slab	reinforcement bar	7850	0.003094	kg/m2 (GFA)		YES	(From case study)
Skin	Wall	Cladding	Brick cladding system	Brix brick cladding system	brick slip	1750	30.74	kg/m2 (wall elevation area)		YES	1
Skin	Wall	Cladding	Brick cladding system	Brix brick cladding system	mortar	2162	6.71	kg/m2 (wall elevation area)		YES	1
Skin	Wall	Cladding	Brick cladding system	Brix brick cladding system	steel	7800	15.09	kg/m2 (wall elevation area)		YES	1
Skin	Wall	Cladding	Brick cladding system	MECHSLIP brick slip cladding system	brick slip	1750	42	kg/m2 (wall elevation area)		YES	2
Skin	Wall	Cladding	Brick cladding system	MECHSLIP brick slip cladding system	mortar	2162	5	kg/m2 (wall elevation area)		YES	2
Skin	Wall	Cladding	Brick cladding system	MECHSLIP brick slip cladding system	steel	7900	1.48	kg/m2 (wall elevation area)		YES	2
Skin	Wall	Cladding	Brick cladding system	MECHSLIP brick slip cladding system	aluminium	2700	3	kg/m2 (wall elevation area)		YES	2
Skin	Wall	Cladding	Brick cladding system	NaturAL-X brick cladding system	brick slip	1750	47.4	kg/m2 (wall elevation area)		YES	3
Skin	Wall	Cladding	Brick cladding system	NaturAL-X brick cladding system	mortar	2162	5.3	kg/m2 (wall elevation area)		YES	3
Skin	Wall	Cladding	Brick cladding system	NaturAL-X brick cladding system	aluminium	2700	4.48	kg/m2 (wall elevation area)		YES	3
Skin	Wall	Cladding	Brick cladding system	Corium brick cladding system	brick slip	1750	46.956	kg/m2 (wall elevation area)		YES	4
Skin	Wall	Cladding	Brick cladding system	Corium brick cladding system	mortar	2162	5	kg/m2 (wall elevation area)		YES	4
Skin	Wall	Cladding	Brick cladding system	Corium brick cladding system	steel	7900	16.044	kg/m2 (wall elevation area)		YES	4
Skin	Wall	Insulation	Expanded polystyrene (EPS)	25 mm thick EPS insulation	expanded polystyrene (eps)	15	0.375	kg/m2 (wall elevation area)			5,6,7,8
Skin	Wall	Insulation	Expanded polystyrene (EPS)	50 mm thick EPS insulation	expanded polystyrene (eps)	15	0.75	kg/m2 (wall elevation area)			5,6,7,8
Skin	Wall	Insulation	Polyurethane foam (PU)	25 mm thick PU insulation	polyurethane foam	30	0.75	kg/m2 (wall elevation area)			5,9,6,8
Skin	Wall	Insulation	Polyurethane foam (PU)	35 mm thick PU insulation	polyurethane foam	30	1.05	kg/m2 (wall elevation area)			5,9,6,8
Skin	Wall	Insulation	Polyurethane foam (PU)	50 mm thick PU insulation	polyurethane foam	30	1.5	kg/m2 (wall elevation area)			5,9,6,8
Skin	Wall	Insulation	Polyurethane foam (PU)	100 mm thick PU insulation	polyurethane foam	30	3	kg/m2 (wall elevation area)		YES	5,9,6,8
Skin	Wall	Insulation	Polyurethane foam (PU)	150 mm thick PU insulation	polyurethane foam	30	4.5	kg/m2 (wall elevation area)		YES	5,9,6,8
Skin	Wall	Insulation	Polyurethane foam (PU)	200 mm thick PU insulation	polyurethane foam	30	6	kg/m2 (wall elevation area)		YES	5,9,6,8
Skin	Wall	Insulation	Mineral wool insulation	25 mm thick mineral wool quilt	mineral wool (quilt)	12	0.3	kg/m2 (wall elevation area)			5,9,6,8
Skin	Wall	Insulation	Mineral wool insulation	50 mm thick mineral wool quilt	mineral wool (quilt)	12	0.6	kg/m2 (wall elevation area)			5,9,6,8
Skin	Wall	Insulation	Mineral wool insulation	85 mm thick mineral wool quilt	mineral wool (quilt)	12	1.02	kg/m2 (wall elevation area)			5,9,6,8
Skin	Wall	Insulation	Mineral wool insulation	95 mm thick mineral wool quilt	mineral wool (quilt)	12	1.14	kg/m2 (wall elevation area)			5,9,6,8
Skin	Wall	Insulation	Mineral wool insulation	100 mm thick mineral wool quilt	mineral wool (quilt)	12	1.2	kg/m2 (wall elevation area)		YES	5,9,6,8
Skin	Wall	Insulation	Mineral wool insulation	140 mm thick mineral wool quilt	mineral wool (quilt)	12	1.68	kg/m2 (wall elevation area)		YES	5,9,6,8
Skin	Wall	Insulation	Mineral wool insulation	150 mm thick mineral wool quilt	mineral wool (quilt)	12	1.8	kg/m2 (wall elevation area)		YES	5,9,6,8
Skin	Wall	Insulation	Mineral wool insulation	200 mm thick mineral wool quilt	mineral wool (quilt)	12	2.4	kg/m2 (wall elevation area)		YES	5,9,6,8
Skin	Wall	Insulation	Blown fibre insulation	50 mm thick blown fibre insulation	blown fibre	12	0.6	kg/m2 (wall elevation area)			5,10,11,8
Skin	Wall	Insulation	Blown fibre insulation	100 mm thick blown fibre insulation	blown fibre	12	1.2	kg/m2 (wall elevation area)			5,10,11,8
Skin	Wall	Insulation	Urea Formaldehyde (UF) foam	50 mm thick UF foam insulation	urea formaldehyde (uf) foam	10	0.5	kg/m2 (wall elevation area)			5,12,8
Skin	Wall	Insulation	No Insulation	Airspace	airspace	0	0	kg/m2 (wall elevation area)	YES
Skin	Wall	Internal finish	Timber	19 mm thick plywood sheathing	plywood	500	9.5	kg/m2 (wall elevation area)		YES	5,13
Skin	Wall	Internal finish	Plaster	13 mm thick dense plaster	plaster	1300	16.9	kg/m2 (wall elevation area)	YES	YES	5,8
Skin	Wall	Internal finish	Plaster	13 mm thick lightweight plaster	plaster	600	7.8	kg/m2 (wall elevation area)	YES	YES	5,8
Skin	Wall	Internal finish	Plaster	25 mm thick dense plaster on laths	plaster	1300	32.5	kg/m2 (wall elevation area)	YES	YES	5,8
Skin	Wall	Internal finish	Plasterboard	12.5 mm thick plasterboard	plasterboard	700	8.75	kg/m2 (wall elevation area)		YES	5,14
Skin	Wall	Internal finish	Plasterboard	13 mm thick dense plasterboard	plasterboard	900	11.7	kg/m2 (wall elevation area)		YES	5,14
Skin	Wall	Internal finish	Plasterboard	15 mm thick plasterboard	plasterboard	700	10.5	kg/m2 (wall elevation area)		YES	5,14
Skin	Floor	Finish 1	Floor finish	4 mm thick vinyl covering	vinyl floor covering	1390	5.56	kg/m2 (floor area)		YES	5,23
Skin	Floor	Finish 1	Floor finish	10 mm thick carpet/underlay	carpet/underlay	200	2	kg/m2 (floor area)	YES	YES	5,8
Skin	Floor	Intermediate finish 1	Timber	25 mm thick wood block	timber	700	17.5	kg/m2 (floor area)		YES	5,15
Skin	Floor	Intermediate finish 1	Timber	19 mm thick timber or chipboard	chipboard	600	11.4	kg/m2 (floor area)		YES	5,8
Skin	Floor	Intermediate finish 1	Screed	50 mm thick screed	screed	1200	60	kg/m2 (floor area)	YES	YES	5,8,16,17
Skin	Floor	Intermediate finish 1	Screed	75 mm thick screed	screed	1200	90	kg/m2 (floor area)	YES	YES	5,8,16,17
Skin	Floor	Insulation	Expanded polystyrene (EPS)	25 mm thick EPS insulation	expanded polystyrene (eps)	15	0.375	kg/m2 (floor area)			5,6,7,8
Skin	Floor	Insulation	Expanded polystyrene (EPS)	50 mm thick EPS insulation	expanded polystyrene (eps)	15	0.75	kg/m2 (floor area)			5,6,7,8
Skin	Floor	Insulation	Polyurethane foam (PU)	25 mm thick PU insulation	polyurethane foam	30	0.75	kg/m2 (floor area)			5,9,6,8
Skin	Floor	Insulation	Polyurethane foam (PU)	35 mm thick PU insulation	polyurethane foam	30	1.05	kg/m2 (floor area)			5,9,6,8
Skin	Floor	Insulation	Polyurethane foam (PU)	50 mm thick PU insulation	polyurethane foam	30	1.5	kg/m2 (floor area)			5,9,6,8
Skin	Floor	Insulation	Polyurethane foam (PU)	100 mm thick PU insulation	polyurethane foam	30	3	kg/m2 (floor area)		YES	5,9,6,8
Skin	Floor	Insulation	Polyurethane foam (PU)	150 mm thick PU insulation	polyurethane foam	30	4.5	kg/m2 (floor area)		YES	5,9,6,8
Skin	Floor	Insulation	Polyurethane foam (PU)	200 mm thick PU insulation	polyurethane foam	30	6	kg/m2 (floor area)		YES	5,9,6,8
Skin	Floor	Insulation	Mineral wool insulation	25 mm thick mineral wool quilt	mineral wool (quilt)	12	0.3	kg/m2 (floor area)			5,9,6,8
Skin	Floor	Insulation	Mineral wool insulation	50 mm thick mineral wool quilt	mineral wool (quilt)	12	0.6	kg/m2 (floor area)			5,9,6,8
Skin	Floor	Insulation	Mineral wool insulation	85 mm thick mineral wool quilt	mineral wool (quilt)	12	1.02	kg/m2 (floor area)			5,9,6,8
Skin	Floor	Insulation	Mineral wool insulation	95 mm thick mineral wool quilt	mineral wool (quilt)	12	1.14	kg/m2 (floor area)			5,9,6,8
Skin	Floor	Insulation	Mineral wool insulation	100 mm thick mineral wool quilt	mineral wool (quilt)	12	1.2	kg/m2 (floor area)		YES	5,9,6,8
Skin	Floor	Insulation	Mineral wool insulation	140 mm thick mineral wool quilt	mineral wool (quilt)	12	1.68	kg/m2 (floor area)		YES	5,9,6,8
Skin	Floor	Insulation	Mineral wool insulation	150 mm thick mineral wool quilt	mineral wool (quilt)	12	1.8	kg/m2 (floor area)		YES	5,9,6,8
Skin	Floor	Insulation	Mineral wool insulation	200 mm thick mineral wool quilt	mineral wool (quilt)	12	2.4	kg/m2 (floor area)		YES	5,9,6,8
Skin	Floor	Insulation	Blown fibre insulation	50 mm thick blown fibre insulation	blown fibre	12	0.6	kg/m2 (floor area)			5,10,11,8
Skin	Floor	Insulation	Blown fibre insulation	100 mm thick blown fibre insulation	blown fibre	12	1.2	kg/m2 (floor area)			5,10,11,8
Skin	Floor	Insulation	Urea Formaldehyde (UF) foam	50 mm thick UF foam insulation	urea formaldehyde (uf) foam	10	0.5	kg/m2 (floor area)			5,12,8
Skin	Floor	Insulation	No Insulation	Airspace	airspace	0	0	kg/m2 (floor area)	YES
Skin	Roof	Finish 1	Plasterboard	12.5 mm thick plasterboard	plasterboard	700	8.75	kg/m2 (roof area)		YES	5,14
Skin	Roof	Finish 1	Plasterboard	13 mm thick dense plasterboard	plasterboard	900	11.7	kg/m2 (roof area)		YES	5,14
Skin	Roof	Finish 1	Plasterboard	15 mm thick plasterboard	plasterboard	700	10.5	kg/m2 (roof area)		YES	5,14
Skin	Roof	Finish 1	Sheet metal	0.4 mm thick sheet metal	steel	7800	3.12	kg/m2 (roof area)		YES	5,8,18
Skin	Roof	Finish 1	Sheet metal	0.7 mm thick sheet metal	steel	7800	5.46	kg/m2 (roof area)		YES	5,8,18
Skin	Roof	Insulation	No Insulation	Airspace	airspace	0	0	kg/m2 (roof area)	YES
Skin	Roof	Insulation	Expanded polystyrene (EPS)	25 mm thick EPS insulation	expanded polystyrene (eps)	15	0.375	kg/m2 (roof area)			5,6,7,8
Skin	Roof	Insulation	Expanded polystyrene (EPS)	50 mm thick EPS insulation	expanded polystyrene (eps)	15	0.75	kg/m2 (roof area)			5,6,7,8
Skin	Roof	Insulation	Polyurethane foam (PU)	25 mm thick PU insulation	polyurethane foam	30	0.75	kg/m2 (roof area)			5,9,6,8
Skin	Roof	Insulation	Polyurethane foam (PU)	35 mm thick PU insulation	polyurethane foam	30	1.05	kg/m2 (roof area)			5,9,6,8
Skin	Roof	Insulation	Polyurethane foam (PU)	50 mm thick PU insulation	polyurethane foam	30	1.5	kg/m2 (roof area)			5,9,6,8
Skin	Roof	Insulation	Polyurethane foam (PU)	100 mm thick PU insulation	polyurethane foam	30	3	kg/m2 (roof area)			5,9,6,8
Skin	Roof	Insulation	Polyurethane foam (PU)	150 mm thick PU insulation	polyurethane foam	30	4.5	kg/m2 (roof area)		YES	5,9,6,8
Skin	Roof	Insulation	Polyurethane foam (PU)	200 mm thick PU insulation	polyurethane foam	30	6	kg/m2 (roof area)		YES	5,9,6,8
Skin	Roof	Insulation	Mineral wool insulation	25 mm thick mineral wool quilt	mineral wool (quilt)	12	0.3	kg/m2 (roof area)			5,9,6,8
Skin	Roof	Insulation	Mineral wool insulation	50 mm thick mineral wool quilt	mineral wool (quilt)	12	0.6	kg/m2 (roof area)			5,9,6,8
Skin	Roof	Insulation	Mineral wool insulation	85 mm thick mineral wool quilt	mineral wool (quilt)	12	1.02	kg/m2 (roof area)			5,9,6,8
Skin	Roof	Insulation	Mineral wool insulation	95 mm thick mineral wool quilt	mineral wool (quilt)	12	1.14	kg/m2 (roof area)			5,9,6,8
Skin	Roof	Insulation	Mineral wool insulation	100 mm thick mineral wool quilt	mineral wool (quilt)	12	1.2	kg/m2 (roof area)			5,9,6,8
Skin	Roof	Insulation	Mineral wool insulation	140 mm thick mineral wool quilt	mineral wool (quilt)	12	1.68	kg/m2 (roof area)			5,9,6,8
Skin	Roof	Insulation	Mineral wool insulation	150 mm thick mineral wool quilt	mineral wool (quilt)	12	1.8	kg/m2 (roof area)			5,9,6,8
Skin	Roof	Insulation	Mineral wool insulation	200 mm thick mineral wool quilt	mineral wool (quilt)	12	2.4	kg/m2 (roof area)		YES	5,9,6,8
Skin	Roof	Insulation	Blown fibre insulation	50 mm thick blown fibre insulation	blown fibre	12	0.6	kg/m2 (roof area)			5,10,11,8
Skin	Roof	Insulation	Blown fibre insulation	100 mm thick blown fibre insulation	blown fibre	12	1.2	kg/m2 (roof area)			5,10,11,8
Skin	Roof	Insulation	Urea Formaldehyde (UF) foam	50 mm thick UF foam insulation	urea formaldehyde (uf) foam	10	0.5	kg/m2 (roof area)			5,12,8
Skin	Roof	Intermediate finish 1	Screed	50 mm thick screed	screed	1200	60	kg/m2 (roof area)		YES	5,8,16,17
Skin	Roof	Intermediate finish 1	Screed	75 mm thick screed	screed	1200	90	kg/m2 (roof area)		YES	5,8,16,17
Skin	Roof	Intermediate finish 1	Covering	0.3 mm thick Polyethylene vapour control	polyethylene vapour control	900	0.27	kg/m2 (roof area)		YES	5
Skin	Roof	Intermediate finish 1	Covering	4 mm thick water proof covering	waterproof roof covering	110	0.44	kg/m2 (roof area)		YES	5,19
Skin	Roof	Intermediate support	Timber	19 mm thick timber decking	timber	500	9.5	kg/m2 (roof area)		YES	5,15
Skin	Roof	Intermediate finish 2	Roofing felt	3 mm thick roofing felt	roofing felt	61.6667	0.19	kg/m2 (roof area)		YES	5,20
Skin	Roof	Intermediate finish 2	Screed	50 mm thick screed	screed	1200	60	kg/m2 (roof area)	YES	YES	5,8,16,17
Skin	Roof	Intermediate finish 2	Screed	75 mm thick screed	screed	1200	90	kg/m2 (roof area)	YES	YES	5,8,16,17
Skin	Roof	Intermediate finish 2	Covering	0.3 mm thick Polyethylene vapour control	polyethylene vapour control	900	0.27	kg/m2 (roof area)		YES	5
Skin	Roof	Intermediate finish 2	Covering	4 mm thick water proof covering	waterproof roof covering	110	0.44	kg/m2 (roof area)		YES	5,19
Skin	Roof	Finish 2	Sheet metal	0.4 mm thick sheet metal	steel	7800	3.12	kg/m2 (roof area)		YES	5,8,18
Skin	Roof	Finish 2	Sheet metal	0.7 mm thick sheet metal	steel	7800	5.46	kg/m2 (roof area)		YES	5,8,18
Skin	Roof	Finish 2	Tiles	13 mm thick Clay tiles	clay tiles	2270	29.51	kg/m2 (roof area)	YES	YES	5,8
Skin	Roof	Finish 2	Tiles	13 mm thick Concrete tiles	concrete tiles	2100	27.3	kg/m2 (roof area)	YES	YES	5,8
Skin	Roof	Finish 2	Tiles	13 mm thick Slate tiles	slate tiles	2800	36.4	kg/m2 (roof area)	YES	YES	5,8
Skin	Roof	Finish 2	Covering	4 mm thick water proof covering	waterproof roof covering	110	0.44	kg/m2 (roof area)		YES	5,19
Skin	Roof	Finish 2	Ballast	75 mm thick ballast (gravel)	ballast (gravel)	1800	135	kg/m2 (roof area)			5,8
Space	Wall	Finish 1	Plaster	13 mm thick dense plaster	plaster	1300	16.9	kg/m2 (wall elevation area)	YES	YES	5,8
Space	Wall	Finish 1	Plaster	13 mm thick lightweight plaster	plaster	600	7.8	kg/m2 (wall elevation area)	YES	YES	5,8
Space	Wall	Finish 1	Plasterboard	12.5 mm thick plasterboard	plasterboard	700	8.75	kg/m2 (wall elevation area)		YES	5,14
Space	Wall	Finish 1	Plasterboard	13 mm thick dense plasterboard	plasterboard	900	11.7	kg/m2 (wall elevation area)		YES	5,14
Space	Wall	Finish 1	Plasterboard	15 mm thick plasterboard	plasterboard	700	10.5	kg/m2 (wall elevation area)		YES	5,14
Space	Wall	Finish 1	Plasterboard	19 mm thick plywood sheathing	plywood	500	9.5	kg/m2 (wall elevation area)		YES	5,13
Space	Wall	Intermediate finish 1	Timber	6.5 mm thick 35 mm wide timber laths	timber	500	1.25125	kg/m2 (wall elevation area)	YES		5,8
Space	Wall	Intermediate finish 1	Timber	19 mm thick timber or chipboard	chipboard	600	11.4	kg/m2 (wall elevation area)		YES	5,8
Space	Wall	Non-Load Bearing Structure	Brick	105 mm thick brick	brick	1750	183.75	kg/m2 (wall elevation area)	YES	YES	5,8,18
Space	Wall	Non-Load Bearing Structure	Brick	215 mm thick brick	brick	1750	376.25	kg/m2 (wall elevation area)	YES	YES	5,8,18
Space	Wall	Non-Load Bearing Structure	Brick	220 mm thick brick	brick	1750	385	kg/m2 (wall elevation area)	YES		5,8,18
Space	Wall	Non-Load Bearing Structure	Precast concrete block	100 mm thick dense concrete block	concrete block	2300	230	kg/m2 (wall elevation area)		YES	5,8,16,17
Space	Wall	Non-Load Bearing Structure	Precast concrete block	100 mm thick lightweight aggregate concrete block	lightweight aggregate concrete block	600	60	kg/m2 (wall elevation area)		YES	5,8,16,17
Space	Wall	Non-Load Bearing Structure	Precast concrete block	200 mm thick dense concrete block	concrete block	2300	460	kg/m2 (wall elevation area)		YES	5,8,16,17
Space	Wall	Non-Load Bearing Structure	Precast concrete block	215 mm thick dense concrete block	concrete block	2300	494.5	kg/m2 (wall elevation area)		YES	5,8,16,17
Space	Wall	Non-Load Bearing Structure	Precast concrete block	220 mm thick no-fines concrete	no-fines concrete	2000	440	kg/m2 (wall elevation area)		YES	5,8,16,17
Space	Wall	Non-Load Bearing Structure	Precast concrete block	80 mm thick dense concrete	concrete block	2300	184	kg/m2 (wall elevation area)		YES	5,8,16,17
Space	Wall	Non-Load Bearing Structure	Precast concrete block	100 mm thick autoclaved aerated concrete block	autoclaved aerated concrete block	700	70	kg/m2 (wall elevation area)		YES	5,7,8,16,17
Space	Wall	Non-Load Bearing Structure	Precast concrete block	150 mm thick autoclaved aerated concrete block	autoclaved aerated concrete block	700	105	kg/m2 (wall elevation area)		YES	5,7,8,16,17
Space	Wall	Intermediate support	Timber	95 mm thick studding at 600mm c/c spacing	timber studwork	500	6.6975	kg/m2 (wall elevation area)	YES	YES	5,21,8,22
Space	Wall	Intermediate support	Timber	140 mm thick studding at 600mm c/c spacing	timber studwork	500	9.87	kg/m2 (wall elevation area)	YES	YES	5,21,8,22
Space	Wall	Intermediate support	Timber	25 mm thick timber battens at 600mm c/c spacing	timber studwork	500	1.7625	kg/m2 (wall elevation area)	YES	YES	5,21,8,22
Space	Wall	Intermediate finish 2	Timber	6.5 mm thick 35 mm wide timber laths	timber	500	1.25125	kg/m2 (wall elevation area)	YES		5,8
Space	Wall	Intermediate finish 2	Timber	19 mm thick timber or chipboard	chipboard	600	11.4	kg/m2 (wall elevation area)		YES	5,8
Space	Wall	Finish 2	Plasterboard	12.5 mm thick plasterboard	plasterboard	700	8.75	kg/m2 (wall elevation area)		YES	5,14
Space	Wall	Finish 2	Plasterboard	13 mm thick dense plasterboard	plasterboard	900	11.7	kg/m2 (wall elevation area)		YES	5,14
Space	Wall	Finish 2	Plasterboard	15 mm thick plasterboard	plasterboard	700	10.5	kg/m2 (wall elevation area)		YES	5,14
Space	Wall	Finish 2	Plasterboard	19 mm thick plywood sheathing	plywood	500	9.5	kg/m2 (wall elevation area)		YES	5,13
Space	Wall	Finish 2	Plaster	13 mm thick dense plaster	plaster	1300	16.9	kg/m2 (wall elevation area)	YES	YES	5,8
Space	Wall	Finish 2	Plaster	13 mm thick lightweight plaster	plaster	600	7.8	kg/m2 (wall elevation area)	YES	YES	5,8
Space	Floor	Finish 1	Floor finish	4 mm thick vinyl covering	vinyl floor covering	1390	5.56	kg/m2 (floor area)		YES	5,23
Space	Floor	Finish 1	Floor finish	10 mm thick carpet/underlay	carpet/underlay	200	2	kg/m2 (floor area)	YES	YES	5,8
Space	Floor	Intermediate finish 1	Timber	25 mm thick wood block	timber	700	17.5	kg/m2 (floor area)		YES	5,15
Space	Floor	Intermediate finish 1	Timber	19 mm thick timber or chipboard	chipboard	600	11.4	kg/m2 (floor area)	YES	YES	5,8
Space	Floor	Intermediate finish 1	Screed	50 mm thick screed	screed	1200	60	kg/m2 (floor area)	YES	YES	5,8,16,17
Space	Floor	Intermediate finish 1	Screed	75 mm thick screed	screed	1200	90	kg/m2 (floor area)	YES	YES	5,8,16,17
Space	Floor	Finish 2	Building board	12 mm thick cementitious building board on underside	cement bonded particleboard	1200	14.4	kg/m2 (floor area)		YES	5,24
Space	Floor	Finish 2	Plasterboard	12.5 mm thick plasterboard	plasterboard	700	8.75	kg/m2 (floor area)		YES	5,14
Space	Floor	Finish 2	Plasterboard	13 mm thick dense plasterboard	plasterboard	900	11.7	kg/m2 (floor area)		YES	5,14
Space	Floor	Finish 2	Plasterboard	15 mm thick plasterboard	plasterboard	700	10.5	kg/m2 (floor area)		YES	5,14
Space	Floor	Finish 2	Plaster	13 mm thick dense plaster	plaster	1300	16.9	kg/m2 (floor area)	YES	YES	5,8
Space	Floor	Finish 2	Plaster	13 mm thick lightweight plaster	plaster	600	7.8	kg/m2 (floor area)	YES	YES	5,8
	References
		1	Stofix Suomi Oy (2024). Environmental Product Declaration The Brix Brick Cladding System. Kiwa-Ecobility Experts
		2	Ibstock Kevingtion, Ash & Lacy (2019). MECHSLIP product pack. Available from: https://www.aquariancladding.co.uk/downloads?_gl=1*1izmu7p*_up*MQ..*_ga*MTMyMTE2NjYzNy4xNzQ3NDA2MjMx*_ga_F55TC84JRK*czE3NDc0MDYyMzEkbzEkZzEkdDE3NDc0MDYzNjckajAkbDAkaDA.
		3	ASH & LACY (2024). Natural AL-X Cladding System. Available from: https://www.ashandlacy.com/products/facade/natural-x/
		4	Taylor Maxwell. (2022). Corium FAQs. [online] Available at: https://www.taylormaxwell.co.uk/resources/facades.
		5	CIBSE (2015). Environmental design : CIBSE guide A. London: Chartered Institution Of Building Services Engineers.
		6	Buy Insulation Online. (n.d.). Facts About Expanded Polystyrene Insulation | Insulation Blog. [online] Available at: https://www.buyinsulationonline.co.uk/blog/facts-about-expanded-polystyrene-insulation.
		7	Designingbuildings.co.uk. (2023). Autoclaved aerated concrete. [online] Available at: https://www.designingbuildings.co.uk/wiki/Autoclaved_aerated_concrete [Accessed 13 Mar. 2025]. ‌
		8	Geoffrey Hunt (no date) . Architectural Time Line A history of building in the UK from the 15th century to the present day.
		9	First Choice Energy. (n.d.). Different types of cavity wall insulation… and their pros and cons! [online] Available at: https://firstchoiceenergy.co.uk/cavity-wall-insulation-removal/insulation-material-pros-cons/.
		10	Buy Insulation Online (n.d.). The History of Insulation | Buy Insulation Online Blog. [online] Buy Insulation Online. Available at: https://www.buyinsulationonline.co.uk/blog/the-history-of-insulation.
		11	Eco Spray-Foam Systems (2019). A History of Home Insulation – Traditional Insulations. [online] www.sprayfoam.co.uk. Available at: https://www.sprayfoam.co.uk/blog/traditional-insulation-history.html.
		12	BuildingMaterials.co.uk. (2024). Can Cavity Wall Insulation be Removed? [online] Available at: https://www.buildingmaterials.co.uk/info-hub/insulation/can-cavity-wall-insulation-be-removed [Accessed 18 Feb. 2025].
		13	Summers, G. (2025). PLYWOOD: THE UNLIKELY MODERN ICON. [online] The Fine Art Society Ltd. Available at: https://www.thefineartsociety.com/journal/issue-1/plywood-the-unlikely-modern-icon/ [Accessed 16 Dec. 2025].
		14	Gracesguide.co.uk. (2021). British Plaster Board - Graces Guide. [online] Available at: https://www.gracesguide.co.uk/British_Plaster_Board [Accessed 17 Feb. 2025].
		15	Fisher, J. (2024). What’s the difference between wooden and composite decking? [online] Select Living Group. Available at: https://selectlivinggroup.co.uk/blogs/blog/composite-decking-vs-natural-wood-decking [Accessed 19 Mar. 2025].
		16	Hashemi, A. (2013). Review of the UK housing history in relation to system building. 6(1), pp.47–58
		17	Drewniok, M.P., Azevedo, J.M.C., Dunant, C.F., Allwood, J.M., Cullen, J.M., Ibell, T. and Hawkins, W. (2022). Mapping Material Use and Embodied Carbon in UK Construction. SSRN Electronic Journal. doi:https://doi.org/10.2139/ssrn.4153659.
		18	Cobb, F. (2009) Structural engineer's pocket book [electronic resource]. 2nd ed. Oxford: Butterworth-Heinemann.
		19	Widopan.co.uk. (2022). The Evolution Of Waterproofing Materials - WIDOPAN UK. [online] Available at: https://widopan.co.uk/news/evolution-waterproofing-materials [Accessed 19 Dec. 2025].
		20	martincastree (2021). Sarking Felt (Part 2) - Domestic Surveys. [online] Domestic Surveys. Available at: https://www.domesticsurveys.co.uk/2021/07/15/lapped-domestic-survey-blog/ [Accessed 19 Dec. 2025].
		21	Designingbuildings.co.uk. (2022). The history of timber construction in the UK. [online] www.designingbuildings.co.uk. Available at: https://www.designingbuildings.co.uk/wiki/The_history_of_timber_construction_in_the_UK.
		22	Romero Perez de Tudela, A., Rose, C.M. and Stegemann, J.A. (2020). Quantification of material stocks in existing buildings using secondary data—A case study for timber in a London Borough. Resources, Conservation & Recycling: X, 5, p.100027. doi:https://doi.org/10.1016/j.rcrx.2019.100027.
		23	Floorbay (2024). The history and development of vinyl flooring. [online] Floorbay. Available at: https://www.floorbay.co.uk/blog/history-of-vinyl-flooring/.
		24	Saunders, A. and Davidson, E. (2013). Cement Boards 101. [online] www.globalcement.com. Available at: https://www.globalcement.com/magazine/articles/825-cement-boards-101.
